# Supplementary material for: Enhancing Traffic Prediction Accuracy: A Comparative Analysis of Data Quality and Model Evaluation Using Artificial Intelligence
Source: Preprints.org preprint supplement (doi:10.20944/preprints202401.1917.v1), 2024-01-26
Supplement: Supplementary file 1 [file supplementary]

## Sheet: Sheet1
کد محور	نام محور		مدت زمان کارکرد(دقیقه)	تعداد کل وسیله نقلیه	تعداد وسیله نقلیه کلاس 1	تعداد وسیله نقلیه کلاس 2	تعداد وسیله نقلیه کلاس 3	تعداد وسیله نقلیه کلاس 4	تعداد وسیله نقلیه کلاس 5	سرعت متوسط	تعداد تخلف سبقت غیرمجاز	تعداد تخلف فاصله غیرمجاز	تعداد تخلف سرعت غیرمجاز	تعداد برگزیده
114501	آزادراه تهران - کرج (عوارضي قديم)	1395/06/01 00:00:00	60	2906	2827	0	0	0	79	95.6	704	624	0	2906
114501	آزادراه تهران - کرج (عوارضي قديم)	1395/06/01 01:00:00	60	1759	1710	0	0	0	49	97.05	475	142	0	1759
114501	آزادراه تهران - کرج (عوارضي قديم)	1395/06/01 02:00:00	60	904	888	0	0	0	16	97.15	246	0	0	904
114501	آزادراه تهران - کرج (عوارضي قديم)	1395/06/01 03:00:00	60	542	532	0	0	0	10	98.79	160	0	0	542
114501	آزادراه تهران - کرج (عوارضي قديم)	1395/06/01 04:00:00	60	707	664	0	0	0	43	98.51	201	0	0	707
114501	آزادراه تهران - کرج (عوارضي قديم)	1395/06/01 05:00:00	60	1175	1105	0	0	0	70	99.59	349	5	0	1175
114501	آزادراه تهران - کرج (عوارضي قديم)	1395/06/01 06:00:00	60	3851	3465	191	8	60	127	100.27	1217	1072	0	3851
114501	آزادراه تهران - کرج (عوارضي قديم)	1395/06/01 07:00:00	60	5545	4684	648	6	113	94	94.37	1301	2231	0	5545
114501	آزادراه تهران - کرج (عوارضي قديم)	1395/06/01 08:00:00	60	5122	3881	1052	4	84	101	94.98	1167	2092	0	5122
114501	آزادراه تهران - کرج (عوارضي قديم)	1395/06/01 09:00:00	60	5082	4179	769	9	38	87	97.76	1437	1530	0	5082
114501	آزادراه تهران - کرج (عوارضي قديم)	1395/06/01 10:00:00	60	5212	4781	328	5	30	68	97.92	1474	1698	0	5212
114501	آزادراه تهران - کرج (عوارضي قديم)	1395/06/01 11:00:00	60	4960	4556	318	3	11	72	104.53	1831	1427	0	4960
114501	آزادراه تهران - کرج (عوارضي قديم)	1395/06/01 12:00:00	60	5094	4869	111	6	23	85	105.05	1942	1469	0	5094
114501	آزادراه تهران - کرج (عوارضي قديم)	1395/06/01 13:00:00	60	4907	4740	72	3	17	75	106.52	1998	1407	0	4907
114501	آزادراه تهران - کرج (عوارضي قديم)	1395/06/01 14:00:00	60	5433	5081	158	10	56	128	106.21	2192	1718	0	5433
114501	آزادراه تهران - کرج (عوارضي قديم)	1395/06/01 15:00:00	60	5946	5590	189	13	49	105	102.29	2088	2046	0	5946
114501	آزادراه تهران - کرج (عوارضي قديم)	1395/06/01 16:00:00	60	6695	6212	242	12	97	132	92.56	1288	2618	0	6695
114501	آزادراه تهران - کرج (عوارضي قديم)	1395/06/01 17:00:00	60	6643	6285	184	4	53	117	94.62	1404	2610	0	6643
114501	آزادراه تهران - کرج (عوارضي قديم)	1395/06/01 18:00:00	60	6490	6149	180	7	62	92	93.45	1284	2529	0	6490
114501	آزادراه تهران - کرج (عوارضي قديم)	1395/06/01 19:00:00	60	6786	6461	170	6	51	98	85.75	560	2686	0	6786
114501	آزادراه تهران - کرج (عوارضي قديم)	1395/06/01 20:00:00	60	5943	5755	23	0	5	160	80.84	84	2240	0	5943
114501	آزادراه تهران - کرج (عوارضي قديم)	1395/06/01 21:00:00	60	6362	6235	0	0	0	127	82.68	200	2599	0	6362
114501	آزادراه تهران - کرج (عوارضي قديم)	1395/06/01 22:00:00	60	5575	5405	0	0	0	170	86.04	456	2158	0	5575
114501	آزادراه تهران - کرج (عوارضي قديم)	1395/06/01 23:00:00	60	4031	3911	0	0	0	120	92.58	755	1009	0	4031
114501	آزادراه تهران - کرج (عوارضي قديم)	1395/06/02 00:00:00	60	3259	3179	0	0	0	80	94.08	721	753	0	3259
114501	آزادراه تهران - کرج (عوارضي قديم)	1395/06/02 01:00:00	60	1905	1861	0	0	0	44	96.28	478	213	0	1905
114501	آزادراه تهران - کرج (عوارضي قديم)	1395/06/02 02:00:00	60	978	960	0	0	0	18	98.88	290	1	0	978
114501	آزادراه تهران - کرج (عوارضي قديم)	1395/06/02 03:00:00	60	582	563	0	0	0	19	98.58	159	0	0	582
114501	آزادراه تهران - کرج (عوارضي قديم)	1395/06/02 04:00:00	60	721	683	0	0	0	38	98.79	207	2	0	721
114501	آزادراه تهران - کرج (عوارضي قديم)	1395/06/02 05:00:00	60	1229	1158	0	0	0	71	97.57	347	69	0	1229
114501	آزادراه تهران - کرج (عوارضي قديم)	1395/06/02 06:00:00	60	4121	3711	200	3	64	143	100.13	1281	1213	0	4121
114501	آزادراه تهران - کرج (عوارضي قديم)	1395/06/02 07:00:00	60	5309	4404	668	10	111	116	93.97	1197	2130	0	5309
114501	آزادراه تهران - کرج (عوارضي قديم)	1395/06/02 08:00:00	60	5203	3929	1092	7	90	85	93.72	1081	2113	0	5203
114501	آزادراه تهران - کرج (عوارضي قديم)	1395/06/02 09:00:00	45	3931	3223	583	6	33	86	97.14	1037	1451	0	5241
114501	آزادراه تهران - کرج (عوارضي قديم)	1395/06/02 10:00:00	60	5189	4679	381	4	35	90	97.66	1422	1833	0	5189
114501	آزادراه تهران - کرج (عوارضي قديم)	1395/06/02 11:15:00	45	3965	3632	236	7	19	71	104.93	1472	1336	0	5286
114501	آزادراه تهران - کرج (عوارضي قديم)	1395/06/02 12:00:00	45	3706	3544	93	2	11	56	105.63	1462	1068	0	4941
114501	آزادراه تهران - کرج (عوارضي قديم)	1395/06/02 13:00:00	60	4862	4677	77	3	18	87	106.68	1996	1395	0	4862
114501	آزادراه تهران - کرج (عوارضي قديم)	1395/06/02 14:00:00	60	5542	5186	167	9	56	124	105.59	2220	1752	0	5542
114501	آزادراه تهران - کرج (عوارضي قديم)	1395/06/02 15:00:00	60	6361	5997	202	5	60	97	100.48	2098	2544	0	6361
114501	آزادراه تهران - کرج (عوارضي قديم)	1395/06/02 16:00:00	60	6955	6478	242	9	109	117	95.51	1675	2756	0	6955
114501	آزادراه تهران - کرج (عوارضي قديم)	1395/06/02 17:00:00	60	6704	6371	177	4	52	100	93.39	1285	2600	0	6704
114501	آزادراه تهران - کرج (عوارضي قديم)	1395/06/02 18:00:00	60	6782	6387	219	4	54	118	92.14	1195	2618	0	6782
114501	آزادراه تهران - کرج (عوارضي قديم)	1395/06/02 19:00:00	60	6516	6163	156	11	56	130	88.76	760	2523	0	6516
114501	آزادراه تهران - کرج (عوارضي قديم)	1395/06/02 20:00:00	60	6088	5932	19	1	3	133	80.11	66	2290	0	6088
114501	آزادراه تهران - کرج (عوارضي قديم)	1395/06/02 21:00:00	60	6265	6116	0	0	0	149	82.39	180	2553	0	6265
114501	آزادراه تهران - کرج (عوارضي قديم)	1395/06/02 22:00:00	60	5692	5523	0	0	0	169	85.44	399	2196	0	5692
114501	آزادراه تهران - کرج (عوارضي قديم)	1395/06/02 23:00:00	60	4396	4260	0	0	0	136	91.31	723	1238	0	4396
114501	آزادراه تهران - کرج (عوارضي قديم)	1395/06/03 00:00:00	60	3429	3361	0	0	0	68	93.61	724	796	0	3429
114501	آزادراه تهران - کرج (عوارضي قديم)	1395/06/03 01:00:00	60	2129	2076	0	0	0	53	96.64	562	296	0	2129
114501	آزادراه تهران - کرج (عوارضي قديم)	1395/06/03 02:00:00	60	1080	1046	0	0	0	34	98.43	320	2	0	1080
114501	آزادراه تهران - کرج (عوارضي قديم)	1395/06/03 03:00:00	60	644	624	0	0	0	20	98.86	186	0	0	644
114501	آزادراه تهران - کرج (عوارضي قديم)	1395/06/03 04:00:00	60	805	771	0	0	0	34	99.09	241	3	0	805
114501	آزادراه تهران - کرج (عوارضي قديم)	1395/06/03 05:00:00	60	1558	1478	0	0	0	80	98.22	445	77	0	1558
114501	آزادراه تهران - کرج (عوارضي قديم)	1395/06/03 06:00:00	60	4402	4036	176	6	71	113	98.21	1242	1304	0	4402
114501	آزادراه تهران - کرج (عوارضي قديم)	1395/06/03 07:00:00	60	5441	4619	600	8	114	100	95.14	1332	2190	0	5441
114501	آزادراه تهران - کرج (عوارضي قديم)	1395/06/03 08:00:00	60	5391	4008	1188	7	79	109	91.9	926	2210	0	5391
114501	آزادراه تهران - کرج (عوارضي قديم)	1395/06/03 09:00:00	60	5445	4405	867	10	54	109	95.99	1377	2115	0	5445
114501	آزادراه تهران - کرج (عوارضي قديم)	1395/06/03 10:00:00	60	5503	5026	365	3	27	82	96.22	1422	2114	0	5503
114501	آزادراه تهران - کرج (عوارضي قديم)	1395/06/03 11:00:00	60	5436	4938	364	9	31	94	102.23	1886	2027	0	5436
114501	آزادراه تهران - کرج (عوارضي قديم)	1395/06/03 12:00:00	60	5431	5221	127	3	17	63	103.44	2041	2102	0	5431
114501	آزادراه تهران - کرج (عوارضي قديم)	1395/06/03 13:00:00	60	5491	5303	84	4	19	81	103.19	2079	1765	0	5491
114501	آزادراه تهران - کرج (عوارضي قديم)	1395/06/03 14:00:00	60	6435	6060	161	12	78	124	99.65	2086	2610	0	6435
114501	آزادراه تهران - کرج (عوارضي قديم)	1395/06/03 15:00:00	60	6767	6374	191	9	61	132	93.51	1425	2693	0	6767
114501	آزادراه تهران - کرج (عوارضي قديم)	1395/06/03 16:00:00	60	7339	6855	244	12	88	140	88.53	1108	3074	0	7339
114501	آزادراه تهران - کرج (عوارضي قديم)	1395/06/03 17:00:00	60	6386	6080	158	4	50	94	93.45	1312	2495	0	6386
114501	آزادراه تهران - کرج (عوارضي قديم)	1395/06/03 18:00:00	60	6303	6001	185	3	35	79	93.82	1360	2297	0	6303
114501	آزادراه تهران - کرج (عوارضي قديم)	1395/06/03 19:00:00	60	6432	6139	140	4	57	92	87.45	568	2452	0	6432
114501	آزادراه تهران - کرج (عوارضي قديم)	1395/06/03 20:00:00	60	5761	5603	7	0	3	148	78.29	38	2178	0	5761
114501	آزادراه تهران - کرج (عوارضي قديم)	1395/06/03 21:00:00	60	6259	6079	10	0	5	165	80.46	140	2566	0	6259
114501	آزادراه تهران - کرج (عوارضي قديم)	1395/06/03 22:00:00	60	5988	5832	0	0	0	156	82.66	274	2488	0	5988
114501	آزادراه تهران - کرج (عوارضي قديم)	1395/06/03 23:00:00	60	5264	5085	0	0	0	179	85.18	456	1834	0	5264
114501	آزادراه تهران - کرج (عوارضي قديم)	1395/06/04 00:00:00	60	4323	4233	0	0	0	90	90.61	720	1209	0	4323
114501	آزادراه تهران - کرج (عوارضي قديم)	1395/06/04 01:00:00	60	2655	2577	0	0	0	78	94.65	635	577	0	2655
114501	آزادراه تهران - کرج (عوارضي قديم)	1395/06/04 02:00:00	60	1413	1393	0	0	0	20	97	389	64	0	1413
114501	آزادراه تهران - کرج (عوارضي قديم)	1395/06/04 03:00:00	60	882	862	0	0	0	20	97.19	243	1	0	882
114501	آزادراه تهران - کرج (عوارضي قديم)	1395/06/04 04:00:00	60	1311	1278	0	0	0	33	97.71	372	4	0	1311
114501	آزادراه تهران - کرج (عوارضي قديم)	1395/06/04 05:00:00	60	2072	2001	0	0	0	71	97.08	576	371	0	2072
114501	آزادراه تهران - کرج (عوارضي قديم)	1395/06/04 06:00:00	60	4288	4012	132	3	42	99	98.18	1245	1135	0	4288
114501	آزادراه تهران - کرج (عوارضي قديم)	1395/06/04 07:00:00	60	4676	3990	482	14	77	113	100.29	1409	1230	0	4676
114501	آزادراه تهران - کرج (عوارضي قديم)	1395/06/04 08:00:00	60	5017	3785	1099	5	60	68	93.94	1069	1874	0	5017
114501	آزادراه تهران - کرج (عوارضي قديم)	1395/06/04 09:00:00	60	5428	4544	764	6	44	70	96.94	1449	2059	0	5428
114501	آزادراه تهران - کرج (عوارضي قديم)	1395/06/04 10:00:00	60	5755	5244	387	3	37	84	95.95	1454	2392	0	5755
114501	آزادراه تهران - کرج (عوارضي قديم)	1395/06/04 11:00:00	60	5894	5440	339	5	28	82	99.23	1796	2450	0	5894
114501	آزادراه تهران - کرج (عوارضي قديم)	1395/06/04 12:00:00	60	6258	5969	154	9	29	97	100.45	2036	2589	0	6258
114501	آزادراه تهران - کرج (عوارضي قديم)	1395/06/04 13:00:00	60	6752	6516	98	3	35	100	97.98	1925	2750	0	6752
114501	آزادراه تهران - کرج (عوارضي قديم)	1395/06/04 14:00:00	60	6822	6588	118	4	31	81	97.46	1899	2736	0	6822
114501	آزادراه تهران - کرج (عوارضي قديم)	1395/06/04 15:00:00	60	6969	6691	138	6	44	90	96.21	1878	2949	0	6969
114501	آزادراه تهران - کرج (عوارضي قديم)	1395/06/04 16:00:00	60	6317	6083	109	8	64	53	96.61	1708	2528	0	6317
114501	آزادراه تهران - کرج (عوارضي قديم)	1395/06/04 17:00:00	60	5828	5606	111	5	27	79	94.67	1338	1603	0	5828
114501	آزادراه تهران - کرج (عوارضي قديم)	1395/06/04 18:00:00	60	6026	5651	291	1	37	46	94.15	1353	2402	0	6026
114501	آزادراه تهران - کرج (عوارضي قديم)	1395/06/04 19:00:00	60	5846	5642	106	6	27	65	88.74	704	1772	0	5846
114501	آزادراه تهران - کرج (عوارضي قديم)	1395/06/04 20:00:00	60	5417	5276	15	0	1	125	82.32	244	1920	0	5417
114501	آزادراه تهران - کرج (عوارضي قديم)	1395/06/04 21:00:00	60	5585	5456	0	0	0	129	83.45	337	2319	0	5585
114501	آزادراه تهران - کرج (عوارضي قديم)	1395/06/04 22:00:00	60	5564	5419	0	0	0	145	84.7	397	2332	0	5564
114501	آزادراه تهران - کرج (عوارضي قديم)	1395/06/04 23:00:00	60	5635	5453	0	0	0	182	80.89	188	2339	0	5635
114501	آزادراه تهران - کرج (عوارضي قديم)	1395/06/05 00:00:00	60	5524	5398	0	0	0	126	83.65	350	2137	0	5524
114501	آزادراه تهران - کرج (عوارضي قديم)	1395/06/05 01:00:00	60	4106	4029	0	0	0	77	90.12	692	1143	0	4106
114501	آزادراه تهران - کرج (عوارضي قديم)	1395/06/05 02:00:00	60	2091	2064	0	0	0	27	95.52	517	303	0	2091
114501	آزادراه تهران - کرج (عوارضي قديم)	1395/06/05 03:00:00	60	1150	1131	0	0	0	19	97.8	333	2	0	1150
114501	آزادراه تهران - کرج (عوارضي قديم)	1395/06/05 04:00:00	60	1109	1067	0	0	0	42	97.91	313	2	0	1109
114501	آزادراه تهران - کرج (عوارضي قديم)	1395/06/05 05:00:00	60	1534	1473	0	0	0	61	96.93	413	137	0	1534
114501	آزادراه تهران - کرج (عوارضي قديم)	1395/06/05 06:00:00	60	2852	2697	41	6	14	94	102.55	973	590	0	2852
114501	آزادراه تهران - کرج (عوارضي قديم)	1395/06/05 07:00:00	60	3512	2835	518	9	75	75	102.73	1069	854	0	3512
114501	آزادراه تهران - کرج (عوارضي قديم)	1395/06/05 08:00:00	60	3920	2793	1006	4	44	73	97.55	1097	937	0	3920
114501	آزادراه تهران - کرج (عوارضي قديم)	1395/06/05 09:00:00	60	4605	3814	693	4	33	61	99.47	1431	1254	0	4605
114501	آزادراه تهران - کرج (عوارضي قديم)	1395/06/05 10:00:00	60	5542	5078	364	4	25	71	95.41	1359	1997	0	5542
114501	آزادراه تهران - کرج (عوارضي قديم)	1395/06/05 11:00:00	60	6067	5701	271	3	30	62	99.4	1838	2680	0	6067
114501	آزادراه تهران - کرج (عوارضي قديم)	1395/06/05 12:00:00	60	6275	6098	103	1	15	58	97.67	1750	2601	0	6275
114501	آزادراه تهران - کرج (عوارضي قديم)	1395/06/05 13:00:00	60	5455	5318	47	2	20	68	102.91	2012	1748	0	5455
114501	آزادراه تهران - کرج (عوارضي قديم)	1395/06/05 14:00:00	60	4909	4763	52	4	26	64	106.73	2066	1397	0	4909
114501	آزادراه تهران - کرج (عوارضي قديم)	1395/06/05 15:00:00	60	4954	4771	88	2	26	67	105.98	2039	1403	0	4954
114501	آزادراه تهران - کرج (عوارضي قديم)	1395/06/05 16:00:00	60	5622	5479	75	4	13	51	101.44	1971	1762	0	5622
114501	آزادراه تهران - کرج (عوارضي قديم)	1395/06/05 17:00:00	60	5531	5365	73	3	20	70	99.22	1701	1550	0	5531
114501	آزادراه تهران - کرج (عوارضي قديم)	1395/06/05 18:00:00	60	5750	5591	86	1	13	59	96.5	1543	1796	0	5750
114501	آزادراه تهران - کرج (عوارضي قديم)	1395/06/05 19:00:00	60	5637	5445	85	3	29	75	90.58	891	2089	0	5637
114501	آزادراه تهران - کرج (عوارضي قديم)	1395/06/05 20:00:00	60	5079	4970	0	0	1	108	83.2	308	1641	0	5079
114501	آزادراه تهران - کرج (عوارضي قديم)	1395/06/05 21:00:00	60	4815	4701	0	0	0	114	87.65	536	1413	0	4815
114501	آزادراه تهران - کرج (عوارضي قديم)	1395/06/05 22:00:00	60	4922	4794	0	0	0	128	87.47	603	1444	0	4922
114501	آزادراه تهران - کرج (عوارضي قديم)	1395/06/05 23:00:00	60	5668	5508	0	0	0	160	82.2	256	2365	0	5668
114501	آزادراه تهران - کرج (عوارضي قديم)	1395/06/06 00:00:00	60	5319	5182	0	0	0	137	85.04	432	1920	0	5319
114501	آزادراه تهران - کرج (عوارضي قديم)	1395/06/06 01:00:00	60	3276	3223	0	0	0	53	92.56	648	767	0	3276
114501	آزادراه تهران - کرج (عوارضي قديم)	1395/06/06 02:00:00	60	1359	1332	0	0	0	27	97.33	383	67	0	1359
114501	آزادراه تهران - کرج (عوارضي قديم)	1395/06/06 03:00:00	60	784	756	0	0	0	28	98.02	220	1	0	784
114501	آزادراه تهران - کرج (عوارضي قديم)	1395/06/06 04:00:00	60	831	784	0	0	0	47	97.55	229	0	0	831
114501	آزادراه تهران - کرج (عوارضي قديم)	1395/06/06 05:00:00	60	1401	1320	0	0	0	81	98.13	401	70	0	1401
114501	آزادراه تهران - کرج (عوارضي قديم)	1395/06/06 06:00:00	60	3574	3283	138	2	36	115	99.29	1095	886	0	3574
114501	آزادراه تهران - کرج (عوارضي قديم)	1395/06/06 07:00:00	60	4914	4218	495	11	109	81	95.77	1301	1630	0	4914
114501	آزادراه تهران - کرج (عوارضي قديم)	1395/06/06 08:00:00	60	4867	3556	1140	4	68	99	94.2	1063	1545	0	4867
114501	آزادراه تهران - کرج (عوارضي قديم)	1395/06/06 09:00:00	60	5314	4311	854	5	50	94	95.48	1279	1721	0	5314
114501	آزادراه تهران - کرج (عوارضي قديم)	1395/06/06 10:00:00	60	5084	4593	366	4	31	90	97.74	1438	1460	0	5084
114501	آزادراه تهران - کرج (عوارضي قديم)	1395/06/06 11:00:00	60	4922	4495	309	7	20	91	101.67	1654	1407	0	4922
114501	آزادراه تهران - کرج (عوارضي قديم)	1395/06/06 12:00:00	60	4786	4571	114	1	15	85	106	1902	1365	0	4786
114501	آزادراه تهران - کرج (عوارضي قديم)	1395/06/06 13:00:00	60	3184	2876	126	9	59	114	73.15	540	811	0	3184
114501	آزادراه تهران - کرج (عوارضي قديم)	1395/06/06 14:00:00	60	4988	4654	145	5	54	130	106.22	2053	1404	0	4988
114501	آزادراه تهران - کرج (عوارضي قديم)	1395/06/06 15:00:00	60	5632	5318	166	7	35	106	103.87	2155	1947	0	5632
114501	آزادراه تهران - کرج (عوارضي قديم)	1395/06/06 16:00:00	60	6770	6313	232	11	83	131	95.89	1708	2695	0	6770
114501	آزادراه تهران - کرج (عوارضي قديم)	1395/06/06 17:00:00	60	6686	6364	150	4	51	117	95.7	1721	2664	0	6686
114501	آزادراه تهران - کرج (عوارضي قديم)	1395/06/06 18:00:00	60	6654	6376	148	6	39	85	96.5	1740	2640	0	6654
114501	آزادراه تهران - کرج (عوارضي قديم)	1395/06/06 19:00:00	60	6378	6088	153	10	33	94	91.48	1021	2512	0	6378
114501	آزادراه تهران - کرج (عوارضي قديم)	1395/06/06 20:00:00	60	5833	5681	1	0	0	151	82.11	153	2238	0	5833
114501	آزادراه تهران - کرج (عوارضي قديم)	1395/06/06 21:00:00	60	6166	6019	0	0	0	147	82.67	222	2550	0	6166
114501	آزادراه تهران - کرج (عوارضي قديم)	1395/06/06 22:00:00	60	4695	4568	0	0	0	127	88.91	691	1380	0	4695
114501	آزادراه تهران - کرج (عوارضي قديم)	1395/06/06 23:00:00	60	3883	3750	0	0	0	133	92	736	905	0	3883
114501	آزادراه تهران - کرج (عوارضي قديم)	1395/06/07 00:00:00	60	2929	2854	0	0	0	75	94.23	687	679	0	2929
114501	آزادراه تهران - کرج (عوارضي قديم)	1395/06/07 01:00:00	60	1717	1688	0	0	0	29	97.3	482	137	0	1717
114501	آزادراه تهران - کرج (عوارضي قديم)	1395/06/07 02:00:00	60	877	860	0	0	0	17	97.68	250	2	0	877
114501	آزادراه تهران - کرج (عوارضي قديم)	1395/06/07 03:00:00	60	621	605	0	0	0	16	97.57	165	1	0	621
114501	آزادراه تهران - کرج (عوارضي قديم)	1395/06/07 04:00:00	60	700	660	0	0	0	40	99.61	221	0	0	700
114501	آزادراه تهران - کرج (عوارضي قديم)	1395/06/07 05:00:00	60	1276	1209	0	0	0	67	97.54	361	9	0	1276
114501	آزادراه تهران - کرج (عوارضي قديم)	1395/06/07 06:00:00	60	3525	3250	124	2	39	110	100.46	1136	883	0	3525
114501	آزادراه تهران - کرج (عوارضي قديم)	1395/06/07 07:00:00	60	5123	4497	444	8	101	73	96.26	1345	1538	0	5123
114501	آزادراه تهران - کرج (عوارضي قديم)	1395/06/07 08:00:00	60	5179	4025	981	12	82	79	90.63	807	1764	0	5179
114501	آزادراه تهران - کرج (عوارضي قديم)	1395/06/07 09:00:00	60	5428	4522	783	3	43	77	94.93	1275	2080	0	5428
114501	آزادراه تهران - کرج (عوارضي قديم)	1395/06/07 10:00:00	60	5104	4612	379	5	22	86	97.48	1442	1487	0	5104
114501	آزادراه تهران - کرج (عوارضي قديم)	1395/06/07 11:00:00	60	4336	3966	277	7	13	73	100.55	1409	1249	0	4336
114501	آزادراه تهران - کرج (عوارضي قديم)	1395/06/07 12:00:00	60	5388	5137	116	8	30	97	96.56	1394	1523	0	5388
114501	آزادراه تهران - کرج (عوارضي قديم)	1395/06/07 13:00:00	60	4842	4671	71	1	21	78	105.75	1969	1381	0	4842
114501	آزادراه تهران - کرج (عوارضي قديم)	1395/06/07 14:00:00	60	5320	4986	142	9	54	129	104.51	2076	1503	0	5320
114501	آزادراه تهران - کرج (عوارضي قديم)	1395/06/07 15:00:00	60	5968	5649	164	3	48	104	102.2	2200	2224	0	5968
114501	آزادراه تهران - کرج (عوارضي قديم)	1395/06/07 16:00:00	60	6820	6369	228	11	82	130	96.9	1845	2724	0	6820
114501	آزادراه تهران - کرج (عوارضي قديم)	1395/06/07 17:00:00	60	6825	6510	165	4	49	97	93.73	1475	2660	0	6825
114501	آزادراه تهران - کرج (عوارضي قديم)	1395/06/07 18:00:00	60	6086	5808	143	6	35	94	90.55	1051	1891	0	6086
114501	آزادراه تهران - کرج (عوارضي قديم)	1395/06/07 19:00:00	60	6716	6382	167	16	56	95	87.38	695	2458	0	6716
114501	آزادراه تهران - کرج (عوارضي قديم)	1395/06/07 20:00:00	60	6176	6007	0	0	0	169	79.26	87	2490	0	6176
114501	آزادراه تهران - کرج (عوارضي قديم)	1395/06/07 21:00:00	60	6083	5923	0	0	0	160	81.98	225	2504	0	6083
114501	آزادراه تهران - کرج (عوارضي قديم)	1395/06/07 22:00:00	60	5061	4913	0	0	0	148	88.18	639	1666	0	5061
114501	آزادراه تهران - کرج (عوارضي قديم)	1395/06/07 23:00:00	60	4069	3951	0	0	0	118	91.44	752	1128	0	4069
114501	آزادراه تهران - کرج (عوارضي قديم)	1395/06/08 00:00:00	60	3075	2997	0	0	0	78	94.94	754	715	0	3075
114501	آزادراه تهران - کرج (عوارضي قديم)	1395/06/08 01:00:00	60	1856	1824	0	0	0	32	96.62	495	208	0	1856
114501	آزادراه تهران - کرج (عوارضي قديم)	1395/06/08 02:00:00	60	937	919	0	0	0	18	97.88	261	0	0	937
114501	آزادراه تهران - کرج (عوارضي قديم)	1395/06/08 03:00:00	60	586	569	0	0	0	17	98.44	168	0	0	586
114501	آزادراه تهران - کرج (عوارضي قديم)	1395/06/08 04:00:00	60	731	695	0	0	0	36	98.73	213	0	0	731
114501	آزادراه تهران - کرج (عوارضي قديم)	1395/06/08 05:00:00	60	1298	1232	0	0	0	66	97.44	363	13	0	1298
114501	آزادراه تهران - کرج (عوارضي قديم)	1395/06/08 06:00:00	60	3546	3277	126	6	33	104	99.1	1087	884	0	3546
114501	آزادراه تهران - کرج (عوارضي قديم)	1395/06/08 07:00:00	60	5279	4752	359	14	86	68	95.01	1311	1962	0	5279
114501	آزادراه تهران - کرج (عوارضي قديم)	1395/06/08 08:00:00	60	5321	4549	623	9	73	67	90.67	897	2043	0	5321
114501	آزادراه تهران - کرج (عوارضي قديم)	1395/06/08 09:00:00	60	5395	4454	798	4	41	98	94.97	1271	2062	0	5395
114501	آزادراه تهران - کرج (عوارضي قديم)	1395/06/08 10:00:00	60	5468	4967	374	8	25	94	95.48	1353	2115	0	5468
114501	آزادراه تهران - کرج (عوارضي قديم)	1395/06/08 11:00:00	60	5163	4751	306	1	17	88	100.49	1642	1492	0	5163
114501	آزادراه تهران - کرج (عوارضي قديم)	1395/06/08 12:00:00	60	5004	4796	104	4	14	86	101.68	1731	1439	0	5004
114501	آزادراه تهران - کرج (عوارضي قديم)	1395/06/08 13:00:00	60	4767	4593	68	3	29	74	104.16	1834	1361	0	4767
114501	آزادراه تهران - کرج (عوارضي قديم)	1395/06/08 14:00:00	60	5336	5010	140	9	56	121	103.9	2053	1679	0	5336
114501	آزادراه تهران - کرج (عوارضي قديم)	1395/06/08 15:00:00	60	5954	5627	169	12	39	107	102.21	2119	2390	0	5954
114501	آزادراه تهران - کرج (عوارضي قديم)	1395/06/08 16:00:00	60	6817	6376	237	8	83	113	95.19	1669	2701	0	6817
114501	آزادراه تهران - کرج (عوارضي قديم)	1395/06/08 17:00:00	60	6674	6346	180	7	45	96	92.94	1272	2596	0	6674
114501	آزادراه تهران - کرج (عوارضي قديم)	1395/06/08 18:00:00	60	6533	6268	136	3	35	91	93.98	1406	2579	0	6533
114501	آزادراه تهران - کرج (عوارضي قديم)	1395/06/08 19:00:00	60	6244	5968	138	7	41	90	91.55	1020	2329	0	6244
114501	آزادراه تهران - کرج (عوارضي قديم)	1395/06/08 20:00:00	60	6030	5822	0	0	0	208	100.12	1559	2105	0	6030
114501	آزادراه تهران - کرج (عوارضي قديم)	1395/06/08 21:00:00	60	6725	6455	11	0	5	254	83.51	890	2691	0	6725
114501	آزادراه تهران - کرج (عوارضي قديم)	1395/06/08 22:00:00	60	5256	5111	0	0	0	145	86.9	548	1706	0	5256
114501	آزادراه تهران - کرج (عوارضي قديم)	1395/06/08 23:00:00	60	4052	3924	0	0	0	128	91.41	746	1133	0	4052
114501	آزادراه تهران - کرج (عوارضي قديم)	1395/06/09 00:00:00	60	3363	3285	0	0	0	78	93.55	726	797	0	3363
114501	آزادراه تهران - کرج (عوارضي قديم)	1395/06/09 01:00:00	60	1961	1931	0	0	0	30	95.84	504	283	0	1961
114501	آزادراه تهران - کرج (عوارضي قديم)	1395/06/09 02:00:00	60	1048	1029	0	0	0	19	96.65	287	0	0	1048
114501	آزادراه تهران - کرج (عوارضي قديم)	1395/06/09 03:00:00	60	629	608	0	0	0	21	97.04	170	0	0	629
114501	آزادراه تهران - کرج (عوارضي قديم)	1395/06/09 04:00:00	60	755	724	0	0	0	31	97.83	212	0	0	755
114501	آزادراه تهران - کرج (عوارضي قديم)	1395/06/09 05:00:00	60	1410	1345	0	0	0	65	97.03	387	68	0	1410
114501	آزادراه تهران - کرج (عوارضي قديم)	1395/06/09 06:00:00	60	3628	3369	133	4	38	84	99.02	1085	891	0	3628
114501	آزادراه تهران - کرج (عوارضي قديم)	1395/06/09 07:00:00	60	5272	4751	349	15	109	48	95.03	1312	1769	0	5272
114501	آزادراه تهران - کرج (عوارضي قديم)	1395/06/09 08:00:00	60	5401	4207	993	8	96	97	89.54	749	2282	0	5401
114501	آزادراه تهران - کرج (عوارضي قديم)	1395/06/09 09:00:00	60	5787	4727	896	6	47	111	93.21	1154	2395	0	5787
114501	آزادراه تهران - کرج (عوارضي قديم)	1395/06/09 10:00:00	60	5308	4857	345	8	31	67	97	1406	1861	0	5308
114501	آزادراه تهران - کرج (عوارضي قديم)	1395/06/09 11:00:00	60	5275	4816	355	3	19	82	102.47	1830	1694	0	5275
114501	آزادراه تهران - کرج (عوارضي قديم)	1395/06/09 12:00:00	60	5109	4906	114	2	11	76	104.99	2013	1477	0	5109
114501	آزادراه تهران - کرج (عوارضي قديم)	1395/06/09 13:00:00	60	5043	4842	87	3	21	90	105.98	2053	1428	0	5043
114501	آزادراه تهران - کرج (عوارضي قديم)	1395/06/09 14:00:00	60	5365	5017	153	11	48	136	104.16	2101	1525	0	5365
114501	آزادراه تهران - کرج (عوارضي قديم)	1395/06/09 15:00:00	60	6260	5942	178	4	39	97	99.1	1925	2530	0	6260
114501	آزادراه تهران - کرج (عوارضي قديم)	1395/06/09 16:00:00	60	7018	6556	252	11	85	114	93.23	1463	2917	0	7018
114501	آزادراه تهران - کرج (عوارضي قديم)	1395/06/09 17:00:00	60	6933	6607	176	6	50	94	92.72	1337	2716	0	6933
114501	آزادراه تهران - کرج (عوارضي قديم)	1395/06/09 18:00:00	60	6681	6389	161	6	37	88	92	1189	2651	0	6681
114501	آزادراه تهران - کرج (عوارضي قديم)	1395/06/09 19:00:00	60	6243	5950	141	10	45	97	91.02	972	2311	0	6243
114501	آزادراه تهران - کرج (عوارضي قديم)	1395/06/09 20:00:00	60	6206	6053	0	0	0	153	79.96	76	2528	0	6206
114501	آزادراه تهران - کرج (عوارضي قديم)	1395/06/09 21:00:00	60	6091	5950	0	0	0	141	82.73	269	2495	0	6091
114501	آزادراه تهران - کرج (عوارضي قديم)	1395/06/09 22:00:00	60	5349	5209	0	0	0	140	86.83	553	2092	0	5349
114501	آزادراه تهران - کرج (عوارضي قديم)	1395/06/09 23:00:00	60	4489	4349	0	0	0	140	90.71	789	1315	0	4489
114501	آزادراه تهران - کرج (عوارضي قديم)	1395/06/10 00:00:00	30	1784	1741	0	0	0	43	94	414	414	0	3568
114501	آزادراه تهران - کرج (عوارضي قديم)	1395/06/10 01:00:00	60	2112	2077	0	0	0	35	96.31	559	355	0	2112
114501	آزادراه تهران - کرج (عوارضي قديم)	1395/06/10 02:00:00	60	1086	1046	0	0	0	40	98.2	316	1	0	1086
114501	آزادراه تهران - کرج (عوارضي قديم)	1395/06/10 03:00:00	60	711	686	0	0	0	25	98.2	211	0	0	711
114501	آزادراه تهران - کرج (عوارضي قديم)	1395/06/10 04:00:00	60	904	869	0	0	0	35	97.67	254	1	0	904
114501	آزادراه تهران - کرج (عوارضي قديم)	1395/06/10 05:00:00	60	1550	1476	0	0	0	74	96.92	408	80	0	1550
114501	آزادراه تهران - کرج (عوارضي قديم)	1395/06/10 06:00:00	60	3966	3710	107	2	45	102	96.25	1054	1058	0	3966
114501	آزادراه تهران - کرج (عوارضي قديم)	1395/06/10 07:00:00	60	5648	5166	300	16	98	68	90.54	1175	2312	0	5648
114501	آزادراه تهران - کرج (عوارضي قديم)	1395/06/10 08:00:00	60	5281	4391	743	7	73	67	88.95	673	2030	0	5281
114501	آزادراه تهران - کرج (عوارضي قديم)	1395/06/10 09:00:00	60	5637	4746	745	8	53	85	93.44	1184	2314	0	5637
114501	آزادراه تهران - کرج (عوارضي قديم)	1395/06/10 10:00:00	60	5549	5068	352	5	34	90	95.97	1403	2300	0	5549
114501	آزادراه تهران - کرج (عوارضي قديم)	1395/06/10 11:00:00	60	5401	4928	360	4	27	82	101.5	1857	1865	0	5401
114501	آزادراه تهران - کرج (عوارضي قديم)	1395/06/10 12:00:00	60	5273	5067	106	2	18	80	102.49	1915	1520	0	5273
114501	آزادراه تهران - کرج (عوارضي قديم)	1395/06/10 13:00:00	60	5451	5246	76	3	37	89	104.49	2123	1740	0	5451
114501	آزادراه تهران - کرج (عوارضي قديم)	1395/06/10 14:00:00	60	6185	5849	157	8	55	116	99.43	2013	2495	0	6185
114501	آزادراه تهران - کرج (عوارضي قديم)	1395/06/10 15:00:00	60	6679	6329	187	6	54	103	96.45	1748	2654	0	6679
114501	آزادراه تهران - کرج (عوارضي قديم)	1395/06/10 16:00:00	60	7174	6716	239	8	73	138	92.97	1466	2985	0	7174
114501	آزادراه تهران - کرج (عوارضي قديم)	1395/06/10 17:00:00	60	6352	6065	145	10	35	97	94.18	1403	2486	0	6352
114501	آزادراه تهران - کرج (عوارضي قديم)	1395/06/10 18:00:00	60	6269	6020	128	10	31	80	94.72	1511	2457	0	6269
114501	آزادراه تهران - کرج (عوارضي قديم)	1395/06/10 19:00:00	60	5896	5622	137	10	36	91	91.53	1010	2176	0	5896
114501	آزادراه تهران - کرج (عوارضي قديم)	1395/06/10 20:00:00	60	6206	6033	0	0	0	173	77.35	31	2483	0	6206
114501	آزادراه تهران - کرج (عوارضي قديم)	1395/06/10 21:00:00	60	6278	6119	0	0	0	159	82.19	203	2571	0	6278
114501	آزادراه تهران - کرج (عوارضي قديم)	1395/06/10 22:00:00	60	5728	5588	0	0	0	140	84.7	417	2374	0	5728
114501	آزادراه تهران - کرج (عوارضي قديم)	1395/06/10 23:00:00	60	5129	4963	0	0	0	166	86.4	506	1669	0	5129
114501	آزادراه تهران - کرج (عوارضي قديم)	1395/06/11 00:00:00	60	4339	4240	0	0	0	99	90.95	724	1203	0	4339
114501	آزادراه تهران - کرج (عوارضي قديم)	1395/06/11 01:00:00	60	2625	2592	0	0	0	33	94.42	633	578	0	2625
114501	آزادراه تهران - کرج (عوارضي قديم)	1395/06/11 02:00:00	60	1424	1389	0	0	0	35	96.86	379	63	0	1424
114501	آزادراه تهران - کرج (عوارضي قديم)	1395/06/11 03:00:00	60	952	929	0	0	0	23	97.27	274	0	0	952
114501	آزادراه تهران - کرج (عوارضي قديم)	1395/06/11 04:00:00	60	1322	1276	0	0	0	46	98.22	388	70	0	1322
114501	آزادراه تهران - کرج (عوارضي قديم)	1395/06/11 05:00:00	60	1984	1904	0	0	0	80	96.41	533	284	0	1984
114501	آزادراه تهران - کرج (عوارضي قديم)	1395/06/11 06:00:00	60	3859	3639	89	5	32	94	97.3	1042	974	0	3859
114501	آزادراه تهران - کرج (عوارضي قديم)	1395/06/11 07:00:00	60	5162	4890	128	7	86	51	95.1	1295	1485	0	5162
114501	آزادراه تهران - کرج (عوارضي قديم)	1395/06/11 08:00:00	60	5281	5049	108	11	45	68	92.9	1151	1686	0	5281
114501	آزادراه تهران - کرج (عوارضي قديم)	1395/06/11 09:00:00	60	5409	5174	126	10	57	42	90.23	895	1923	0	5409
114501	آزادراه تهران - کرج (عوارضي قديم)	1395/06/11 10:00:00	60	5501	5136	233	7	38	87	96	1384	2089	0	5501
114501	آزادراه تهران - کرج (عوارضي قديم)	1395/06/11 11:00:00	60	5511	5255	160	6	26	64	101.25	1830	2088	0	5511
114501	آزادراه تهران - کرج (عوارضي قديم)	1395/06/11 12:00:00	60	5969	5760	102	6	28	73	99.47	1958	2288	0	5969
114501	آزادراه تهران - کرج (عوارضي قديم)	1395/06/11 13:00:00	60	6449	6214	107	5	42	81	98.65	1968	2622	0	6449
114501	آزادراه تهران - کرج (عوارضي قديم)	1395/06/11 14:00:00	60	6658	6416	110	4	37	91	98.94	2068	2667	0	6658
114501	آزادراه تهران - کرج (عوارضي قديم)	1395/06/11 15:00:00	60	6503	6267	121	4	30	81	97.67	1883	2635	0	6503
114501	آزادراه تهران - کرج (عوارضي قديم)	1395/06/11 16:00:00	60	6189	6006	95	1	13	74	99.97	2018	2493	0	6189
114501	آزادراه تهران - کرج (عوارضي قديم)	1395/06/11 17:00:00	60	5640	5462	71	6	27	74	99.2	1757	1946	0	5640
114501	آزادراه تهران - کرج (عوارضي قديم)	1395/06/11 18:00:00	60	5223	5073	55	4	23	68	101.51	1808	1469	0	5223
114501	آزادراه تهران - کرج (عوارضي قديم)	1395/06/11 19:00:00	60	3778	3642	52	5	24	55	102.71	1364	908	0	3778
114501	آزادراه تهران - کرج (عوارضي قديم)	1395/06/11 20:00:00	60	3823	3736	0	0	0	87	90.13	617	953	0	3823
114501	آزادراه تهران - کرج (عوارضي قديم)	1395/06/11 21:00:00	60	5378	5244	0	0	0	134	83.88	318	1908	0	5378
114501	آزادراه تهران - کرج (عوارضي قديم)	1395/06/11 22:00:00	60	5367	5225	0	0	0	142	84.86	409	1905	0	5367
114501	آزادراه تهران - کرج (عوارضي قديم)	1395/06/11 23:00:00	60	4488	4371	0	0	0	117	88.42	553	1233	0	4488
114501	آزادراه تهران - کرج (عوارضي قديم)	1395/06/12 00:00:00	60	5799	5647	0	0	0	152	76.46	190	2168	0	5799
114501	آزادراه تهران - کرج (عوارضي قديم)	1395/06/12 01:00:00	60	3798	3743	0	0	0	55	91.77	738	953	0	3798
114501	آزادراه تهران - کرج (عوارضي قديم)	1395/06/12 02:00:00	60	2076	2051	0	0	0	25	94.93	509	230	0	2076
114501	آزادراه تهران - کرج (عوارضي قديم)	1395/06/12 03:00:00	60	1123	1100	0	0	0	23	98.12	324	1	0	1123
114501	آزادراه تهران - کرج (عوارضي قديم)	1395/06/12 04:00:00	15	256	250	0	0	0	6	99	73	0	0	1024
114501	آزادراه تهران - کرج (عوارضي قديم)	1395/06/12 05:00:00	60	1393	1333	0	0	0	60	97.38	391	67	0	1393
114501	آزادراه تهران - کرج (عوارضي قديم)	1395/06/12 06:00:00	60	2663	2543	38	1	15	66	99.45	812	562	0	2663
114501	آزادراه تهران - کرج (عوارضي قديم)	1395/06/12 07:00:00	60	3708	3489	78	2	67	72	97.99	1049	844	0	3708
114501	آزادراه تهران - کرج (عوارضي قديم)	1395/06/12 08:00:00	60	3991	3756	158	5	44	28	89.55	615	978	0	3991
114501	آزادراه تهران - کرج (عوارضي قديم)	1395/06/12 09:00:00	60	4478	4062	320	7	35	54	96.83	1166	1283	0	4478
114501	آزادراه تهران - کرج (عوارضي قديم)	1395/06/12 10:00:00	60	5559	5158	302	2	25	72	94.96	1294	2122	0	5559
114501	آزادراه تهران - کرج (عوارضي قديم)	1395/06/12 11:00:00	60	6272	5912	247	8	22	83	96.95	1658	2594	0	6272
114501	آزادراه تهران - کرج (عوارضي قديم)	1395/06/12 12:00:00	60	6041	5841	112	3	15	70	98.93	1807	2496	0	6041
114501	آزادراه تهران - کرج (عوارضي قديم)	1395/06/12 13:00:00	60	5408	5248	71	2	21	66	103.85	2075	1739	0	5408
114501	آزادراه تهران - کرج (عوارضي قديم)	1395/06/12 14:00:00	60	4928	4767	64	6	24	67	105.22	1976	1400	0	4928
114501	آزادراه تهران - کرج (عوارضي قديم)	1395/06/12 15:00:00	60	4862	4678	83	2	23	76	105.44	1986	1386	0	4862
114501	آزادراه تهران - کرج (عوارضي قديم)	1395/06/12 16:00:00	60	5455	5298	77	4	17	59	102.07	1959	1551	0	5455
114501	آزادراه تهران - کرج (عوارضي قديم)	1395/06/12 17:00:00	60	5535	5374	73	4	14	70	101.23	1896	1750	0	5535
114501	آزادراه تهران - کرج (عوارضي قديم)	1395/06/12 18:00:00	60	5402	5265	60	2	13	62	98.22	1584	1522	0	5402
114501	آزادراه تهران - کرج (عوارضي قديم)	1395/06/12 19:00:00	60	5354	5162	88	2	33	69	94.41	1164	1860	0	5354
114501	آزادراه تهران - کرج (عوارضي قديم)	1395/06/12 20:00:00	60	5128	5014	0	0	0	114	84.74	359	1500	0	5128
114501	آزادراه تهران - کرج (عوارضي قديم)	1395/06/12 21:15:00	45	3423	3336	0	0	0	87	88.66	443	992	0	4563
114501	آزادراه تهران - کرج (عوارضي قديم)	1395/06/12 22:00:00	60	4667	4543	0	0	0	124	87.98	609	1370	0	4667
114501	آزادراه تهران - کرج (عوارضي قديم)	1395/06/12 23:00:00	60	5263	5122	0	0	0	141	84.73	383	1541	0	5263
114501	آزادراه تهران - کرج (عوارضي قديم)	1395/06/13 00:00:00	60	4971	4849	0	0	0	122	86.27	477	1734	0	4971
114501	آزادراه تهران - کرج (عوارضي قديم)	1395/06/13 01:00:00	60	2842	2782	0	0	0	60	93.41	604	606	0	2842
114501	آزادراه تهران - کرج (عوارضي قديم)	1395/06/13 02:00:00	60	1358	1324	0	0	0	34	96.72	369	2	0	1358
114501	آزادراه تهران - کرج (عوارضي قديم)	1395/06/13 03:00:00	60	804	775	0	0	0	29	96.5	212	1	0	804
114501	آزادراه تهران - کرج (عوارضي قديم)	1395/06/13 04:00:00	60	835	787	0	0	0	48	97.93	240	4	0	835
114501	آزادراه تهران - کرج (عوارضي قديم)	1395/06/13 05:00:00	60	1310	1236	0	0	0	74	97.47	365	4	0	1310
114501	آزادراه تهران - کرج (عوارضي قديم)	1395/06/13 06:00:00	60	3968	3632	152	6	60	118	97.11	1079	1178	0	3968
114501	آزادراه تهران - کرج (عوارضي قديم)	1395/06/13 07:00:00	60	5748	5186	340	16	126	80	90.49	1213	2372	0	5748
114501	آزادراه تهران - کرج (عوارضي قديم)	1395/06/13 08:00:00	60	5224	4112	958	8	74	72	87.96	605	2030	0	5224
114501	آزادراه تهران - کرج (عوارضي قديم)	1395/06/13 09:00:00	60	5255	4330	770	7	53	95	95.96	1329	1809	0	5255
114501	آزادراه تهران - کرج (عوارضي قديم)	1395/06/13 10:00:00	60	5129	4619	392	5	31	82	99.17	1580	1672	0	5129
114501	آزادراه تهران - کرج (عوارضي قديم)	1395/06/13 11:00:00	60	4983	4555	306	5	22	95	103.95	1792	1438	0	4983
114501	آزادراه تهران - کرج (عوارضي قديم)	1395/06/13 12:00:00	60	4666	4473	94	3	22	74	106.72	1905	1342	0	4666
114501	آزادراه تهران - کرج (عوارضي قديم)	1395/06/13 13:00:00	60	4717	4556	59	0	28	74	106.97	2008	1354	0	4717
114501	آزادراه تهران - کرج (عوارضي قديم)	1395/06/13 14:00:00	60	5267	4926	150	5	67	119	105.46	2132	1492	0	5267
114501	آزادراه تهران - کرج (عوارضي قديم)	1395/06/13 15:00:00	60	5798	5462	182	5	40	109	102.2	2075	2174	0	5798
114501	آزادراه تهران - کرج (عوارضي قديم)	1395/06/13 16:00:00	60	8210	7535	293	17	167	198	96.17	2082	3247	0	8210
114501	آزادراه تهران - کرج (عوارضي قديم)	1395/06/13 17:00:00	60	6402	6056	183	6	45	112	94.73	1492	2339	0	6402
114501	آزادراه تهران - کرج (عوارضي قديم)	1395/06/13 18:00:00	60	8481	8015	259	9	64	134	88.63	1096	3296	0	8481
114501	آزادراه تهران - کرج (عوارضي قديم)	1395/06/13 19:00:00	60	7668	7267	199	7	61	134	89.27	1039	2851	0	7668
114501	آزادراه تهران - کرج (عوارضي قديم)	1395/06/13 20:00:00	60	7784	7586	0	0	0	198	79.14	95	3140	0	7784
114501	آزادراه تهران - کرج (عوارضي قديم)	1395/06/13 21:00:00	60	6094	5934	0	0	0	160	82.96	286	2523	0	6094
114501	آزادراه تهران - کرج (عوارضي قديم)	1395/06/13 22:00:00	60	4797	4673	0	0	0	124	90.41	772	1404	0	4797
114501	آزادراه تهران - کرج (عوارضي قديم)	1395/06/13 23:00:00	60	4118	3973	0	0	0	145	91.7	780	1085	0	4118
114501	آزادراه تهران - کرج (عوارضي قديم)	1395/06/14 00:00:00	60	3161	3084	0	0	0	77	94.7	734	732	0	3161
114501	آزادراه تهران - کرج (عوارضي قديم)	1395/06/14 01:00:00	60	1989	1935	0	0	0	54	95.9	507	226	0	1989
114501	آزادراه تهران - کرج (عوارضي قديم)	1395/06/14 02:00:00	60	1025	1006	0	0	0	19	98.36	303	1	0	1025
114501	آزادراه تهران - کرج (عوارضي قديم)	1395/06/14 03:00:00	60	582	572	0	0	0	10	98.51	172	0	0	582
114501	آزادراه تهران - کرج (عوارضي قديم)	1395/06/14 04:00:00	60	725	694	0	0	0	31	97.83	205	0	0	725
114501	آزادراه تهران - کرج (عوارضي قديم)	1395/06/14 05:00:00	60	1256	1178	0	0	0	78	98.38	364	0	0	1256
114501	آزادراه تهران - کرج (عوارضي قديم)	1395/06/14 06:00:00	60	4076	3720	156	1	66	133	95.99	1054	1213	0	4076
114501	آزادراه تهران - کرج (عوارضي قديم)	1395/06/14 07:00:00	60	5855	5273	359	12	114	97	89.89	1224	2390	0	5855
114501	آزادراه تهران - کرج (عوارضي قديم)	1395/06/14 08:00:00	60	5413	4067	1168	12	74	92	88.01	628	2225	0	5413
114501	آزادراه تهران - کرج (عوارضي قديم)	1395/06/14 09:00:00	60	5442	4378	919	7	53	85	94.49	1271	2188	0	5442
114501	آزادراه تهران - کرج (عوارضي قديم)	1395/06/14 10:00:00	60	5330	4786	430	5	28	81	97.48	1493	1996	0	5330
114501	آزادراه تهران - کرج (عوارضي قديم)	1395/06/14 11:00:00	60	5095	4650	344	4	22	75	102.89	1803	1618	0	5095
114501	آزادراه تهران - کرج (عوارضي قديم)	1395/06/14 12:00:00	60	5071	4851	112	3	24	81	105.46	2004	1451	0	5071
114501	آزادراه تهران - کرج (عوارضي قديم)	1395/06/14 13:00:00	60	5023	4848	69	3	30	73	106.68	2107	1440	0	5023
114501	آزادراه تهران - کرج (عوارضي قديم)	1395/06/14 14:00:00	60	5592	5212	170	11	65	134	104.12	2141	1941	0	5592
114501	آزادراه تهران - کرج (عوارضي قديم)	1395/06/14 15:00:00	60	6114	5746	194	4	58	112	102.45	2210	2448	0	6114
114501	آزادراه تهران - کرج (عوارضي قديم)	1395/06/14 16:00:00	60	6885	6434	232	12	90	117	95.67	1699	2873	0	6885
114501	آزادراه تهران - کرج (عوارضي قديم)	1395/06/14 17:00:00	60	6673	6288	194	9	72	110	92.7	1299	2579	0	6673
114501	آزادراه تهران - کرج (عوارضي قديم)	1395/06/14 18:00:00	60	6479	6162	159	4	55	99	95.2	1573	2536	0	6479
114501	آزادراه تهران - کرج (عوارضي قديم)	1395/06/14 19:00:00	60	6177	5863	156	6	61	91	87.8	648	2235	0	6177
114501	آزادراه تهران - کرج (عوارضي قديم)	1395/06/14 20:00:00	60	6541	6367	0	0	0	174	75.85	54	2635	0	6541
114501	آزادراه تهران - کرج (عوارضي قديم)	1395/06/14 21:00:00	60	6185	6029	0	0	0	156	82.93	287	2549	0	6185
114501	آزادراه تهران - کرج (عوارضي قديم)	1395/06/14 22:00:00	60	5318	5173	0	0	0	145	87.29	585	1903	0	5318
114501	آزادراه تهران - کرج (عوارضي قديم)	1395/06/14 23:00:00	60	4314	4186	0	0	0	128	90.94	746	1209	0	4314
114501	آزادراه تهران - کرج (عوارضي قديم)	1395/06/15 00:00:00	60	3264	3167	0	0	0	97	93.55	705	767	0	3264
114501	آزادراه تهران - کرج (عوارضي قديم)	1395/06/15 01:00:00	60	1918	1870	0	0	0	48	98	556	214	0	1918
114501	آزادراه تهران - کرج (عوارضي قديم)	1395/06/15 02:00:00	60	1007	988	0	0	0	19	98.22	291	2	0	1007
114501	آزادراه تهران - کرج (عوارضي قديم)	1395/06/15 03:00:00	60	651	629	0	0	0	22	96.92	179	0	0	651
114501	آزادراه تهران - کرج (عوارضي قديم)	1395/06/15 04:00:00	60	746	708	0	0	0	38	96.9	206	0	0	746
114501	آزادراه تهران - کرج (عوارضي قديم)	1395/06/15 05:00:00	60	1304	1233	0	0	0	71	97.55	365	8	0	1304
114501	آزادراه تهران - کرج (عوارضي قديم)	1395/06/15 06:00:00	60	4084	3782	139	4	43	116	96.74	1099	1225	0	4084
114501	آزادراه تهران - کرج (عوارضي قديم)	1395/06/15 07:00:00	60	5640	5036	409	12	115	68	89.98	1195	2239	0	5640
114501	آزادراه تهران - کرج (عوارضي قديم)	1395/06/15 08:00:00	30	2592	1819	696	1	34	42	85.5	171	1066	0	5184
114501	آزادراه تهران - کرج (عوارضي قديم)	1395/06/15 09:00:00	45	4165	3140	903	5	43	74	93.25	889	1678	0	5553
114501	آزادراه تهران - کرج (عوارضي قديم)	1395/06/15 10:00:00	30	2849	2554	218	3	23	51	94.99	675	1192	0	5698
114501	آزادراه تهران - کرج (عوارضي قديم)	1395/06/15 11:00:00	60	5323	4858	353	4	31	77	102.25	1865	1556	0	5323
114501	آزادراه تهران - کرج (عوارضي قديم)	1395/06/15 12:00:00	60	5085	4845	128	10	23	79	103.96	1896	1470	0	5085
114501	آزادراه تهران - کرج (عوارضي قديم)	1395/06/15 13:00:00	60	5259	5036	89	4	37	93	104.71	2037	1494	0	5259
114501	آزادراه تهران - کرج (عوارضي قديم)	1395/06/15 14:00:00	60	5510	5141	166	10	68	125	103.93	2073	1541	0	5510
114501	آزادراه تهران - کرج (عوارضي قديم)	1395/06/15 15:00:00	60	6221	5876	173	10	56	106	99.39	1960	2491	0	6221
114501	آزادراه تهران - کرج (عوارضي قديم)	1395/06/15 16:00:00	60	6822	6376	224	14	85	123	94.71	1563	2665	0	6822
114501	آزادراه تهران - کرج (عوارضي قديم)	1395/06/15 17:00:00	60	6439	6012	255	5	49	118	92	1101	2108	0	6439
114501	آزادراه تهران - کرج (عوارضي قديم)	1395/06/15 18:00:00	60	6427	5865	399	11	54	98	91.47	1123	2464	0	6427
114501	آزادراه تهران - کرج (عوارضي قديم)	1395/06/15 19:00:00	60	5870	5575	148	6	38	103	89.24	771	2149	0	5870
114501	آزادراه تهران - کرج (عوارضي قديم)	1395/06/15 20:00:00	60	5711	5577	0	0	0	134	82.98	303	2158	0	5711
114501	آزادراه تهران - کرج (عوارضي قديم)	1395/06/15 21:00:00	60	6789	6604	0	0	0	185	75.74	0	2991	0	6789
114501	آزادراه تهران - کرج (عوارضي قديم)	1395/06/15 22:00:00	60	5815	5659	0	0	0	156	84.42	400	2407	0	5815
114501	آزادراه تهران - کرج (عوارضي قديم)	1395/06/15 23:00:00	60	4564	4428	0	0	0	136	89.19	640	1268	0	4564
114501	آزادراه تهران - کرج (عوارضي قديم)	1395/06/16 00:00:00	60	3437	3352	0	0	0	85	92.66	704	804	0	3437
114501	آزادراه تهران - کرج (عوارضي قديم)	1395/06/16 01:00:00	60	2097	2043	0	0	0	54	94.7	511	291	0	2097
114501	آزادراه تهران - کرج (عوارضي قديم)	1395/06/16 02:00:00	60	1057	1041	0	0	0	16	97.45	294	0	0	1057
114501	آزادراه تهران - کرج (عوارضي قديم)	1395/06/16 03:00:00	60	647	628	0	0	0	19	99.23	194	0	0	647
114501	آزادراه تهران - کرج (عوارضي قديم)	1395/06/16 04:00:00	60	780	748	0	0	0	32	97.95	227	2	0	780
114501	آزادراه تهران - کرج (عوارضي قديم)	1395/06/16 05:00:00	60	1322	1254	0	0	0	68	97.78	387	68	0	1322
114501	آزادراه تهران - کرج (عوارضي قديم)	1395/06/16 06:00:00	60	4189	3858	163	5	50	113	98.15	1217	1305	0	4189
114501	آزادراه تهران - کرج (عوارضي قديم)	1395/06/16 07:00:00	45	3635	3133	345	8	77	72	97.76	1049	1337	0	4846
114501	آزادراه تهران - کرج (عوارضي قديم)	1395/06/16 08:00:00	60	5141	3138	1830	5	69	99	87.33	616	2106	0	5141
114501	آزادراه تهران - کرج (عوارضي قديم)	1395/06/16 09:00:00	60	5515	4274	1082	6	48	105	94.73	1266	2273	0	5515
114501	آزادراه تهران - کرج (عوارضي قديم)	1395/06/16 10:00:00	60	5452	4842	500	2	30	78	96.93	1493	2036	0	5452
114501	آزادراه تهران - کرج (عوارضي قديم)	1395/06/16 11:00:00	45	4091	3738	266	2	23	62	101.6	1370	1515	0	5454
114501	آزادراه تهران - کرج (عوارضي قديم)	1395/06/16 12:00:00	60	5123	4905	117	3	21	77	104.72	1956	1475	0	5123
114501	آزادراه تهران - کرج (عوارضي قديم)	1395/06/16 13:00:00	60	5225	5056	73	4	19	73	105	2105	1509	0	5225
114501	آزادراه تهران - کرج (عوارضي قديم)	1395/06/16 14:00:00	60	5801	5412	172	15	73	129	102.74	2142	2153	0	5801
114501	آزادراه تهران - کرج (عوارضي قديم)	1395/06/16 15:00:00	60	6731	6415	170	5	45	96	98.47	2047	2708	0	6731
114501	آزادراه تهران - کرج (عوارضي قديم)	1395/06/16 16:00:00	60	6986	6527	229	11	75	144	93.96	1560	3083	0	6986
114501	آزادراه تهران - کرج (عوارضي قديم)	1395/06/16 17:00:00	60	6370	5976	239	11	51	93	93.72	1341	2440	0	6370
114501	آزادراه تهران - کرج (عوارضي قديم)	1395/06/16 18:00:00	60	6508	5971	360	15	67	95	90	955	2509	0	6508
114501	آزادراه تهران - کرج (عوارضي قديم)	1395/06/16 19:00:00	60	6018	5726	150	9	36	97	89.04	741	2198	0	6018
114501	آزادراه تهران - کرج (عوارضي قديم)	1395/06/16 20:00:00	60	6175	6004	0	0	0	171	80.17	109	2507	0	6175
114501	آزادراه تهران - کرج (عوارضي قديم)	1395/06/16 21:00:00	60	6148	5989	0	0	0	159	82.74	224	2534	0	6148
114501	آزادراه تهران - کرج (عوارضي قديم)	1395/06/16 22:00:00	60	5170	5019	0	0	0	151	87.51	604	1850	0	5170
114501	آزادراه تهران - کرج (عوارضي قديم)	1395/06/16 23:00:00	60	4335	4190	0	0	0	145	89.96	691	1214	0	4335
114501	آزادراه تهران - کرج (عوارضي قديم)	1395/06/17 00:00:00	60	3550	3462	0	0	0	88	92.31	709	876	0	3550
114501	آزادراه تهران - کرج (عوارضي قديم)	1395/06/17 01:00:00	60	2232	2186	0	0	0	46	95.4	569	366	0	2232
114501	آزادراه تهران - کرج (عوارضي قديم)	1395/06/17 02:00:00	60	1146	1120	0	0	0	26	97.68	327	1	0	1146
114501	آزادراه تهران - کرج (عوارضي قديم)	1395/06/17 03:00:00	60	752	730	0	0	0	22	97.94	222	0	0	752
114501	آزادراه تهران - کرج (عوارضي قديم)	1395/06/17 04:00:00	60	944	912	0	0	0	32	99.65	295	2	0	944
114501	آزادراه تهران - کرج (عوارضي قديم)	1395/06/17 05:00:00	60	1673	1604	0	0	0	69	97.05	452	69	0	1673
114501	آزادراه تهران - کرج (عوارضي قديم)	1395/06/17 06:00:00	60	4600	4252	146	8	52	142	92.33	890	1437	0	4600
114501	آزادراه تهران - کرج (عوارضي قديم)	1395/06/17 07:00:00	60	5643	5012	423	20	104	84	87.75	1053	2238	0	5643
114501	آزادراه تهران - کرج (عوارضي قديم)	1395/06/17 08:00:00	60	5336	3759	1389	8	70	110	84.75	453	2229	0	5336
114501	آزادراه تهران - کرج (عوارضي قديم)	1395/06/17 09:00:00	60	5512	4408	937	9	57	101	94.25	1241	2120	0	5512
114501	آزادراه تهران - کرج (عوارضي قديم)	1395/06/17 10:00:00	60	5680	5110	455	1	35	79	95.71	1422	2377	0	5680
114501	آزادراه تهران - کرج (عوارضي قديم)	1395/06/17 11:00:00	60	5528	5018	405	3	26	76	100.48	1791	2089	0	5528
114501	آزادراه تهران - کرج (عوارضي قديم)	1395/06/17 12:00:00	60	5608	5380	130	3	18	77	102.98	2044	2321	0	5608
114501	آزادراه تهران - کرج (عوارضي قديم)	1395/06/17 13:00:00	60	5543	5363	74	0	26	80	101.73	2005	1589	0	5543
114501	آزادراه تهران - کرج (عوارضي قديم)	1395/06/17 14:00:00	60	6350	5981	177	12	62	118	99.59	2033	2370	0	6350
114501	آزادراه تهران - کرج (عوارضي قديم)	1395/06/17 15:00:00	60	6821	6486	180	4	42	109	95.99	1782	2730	0	6821
114501	آزادراه تهران - کرج (عوارضي قديم)	1395/06/17 16:00:00	60	7045	6569	239	5	85	147	92.44	1340	3098	0	7045
114501	آزادراه تهران - کرج (عوارضي قديم)	1395/06/17 17:00:00	60	6260	5921	181	4	49	105	93.17	1261	2256	0	6260
114501	آزادراه تهران - کرج (عوارضي قديم)	1395/06/17 18:00:00	60	6293	5983	155	8	49	98	93.22	1257	2058	0	6293
114501	آزادراه تهران - کرج (عوارضي قديم)	1395/06/17 19:00:00	60	5815	5544	129	6	33	103	89.66	870	1796	0	5815
114501	آزادراه تهران - کرج (عوارضي قديم)	1395/06/17 20:00:00	60	5954	5806	0	0	0	148	79.97	103	2414	0	5954
114501	آزادراه تهران - کرج (عوارضي قديم)	1395/06/17 21:00:00	60	6088	5934	0	0	0	154	79.94	131	2473	0	6088
114501	آزادراه تهران - کرج (عوارضي قديم)	1395/06/17 22:00:00	60	5508	5325	0	0	0	183	84.15	332	2127	0	5508
114501	آزادراه تهران - کرج (عوارضي قديم)	1395/06/17 23:00:00	60	5032	4885	0	0	0	147	85.19	414	1794	0	5032
114501	آزادراه تهران - کرج (عوارضي قديم)	1395/06/18 00:00:00	60	3996	3899	0	0	0	97	89.88	640	1000	0	3996
114501	آزادراه تهران - کرج (عوارضي قديم)	1395/06/18 01:00:00	60	2718	2664	0	0	0	54	93.6	622	587	0	2718
114501	آزادراه تهران - کرج (عوارضي قديم)	1395/06/18 02:00:00	60	1478	1452	0	0	0	26	97.15	419	66	0	1478
114501	آزادراه تهران - کرج (عوارضي قديم)	1395/06/18 03:00:00	60	1052	1031	0	0	0	21	97.51	294	1	0	1052
114501	آزادراه تهران - کرج (عوارضي قديم)	1395/06/18 04:00:00	60	1547	1519	0	0	0	28	98.83	473	71	0	1547
114501	آزادراه تهران - کرج (عوارضي قديم)	1395/06/18 05:00:00	60	2362	2305	0	0	0	57	96.04	607	418	0	2362
114501	آزادراه تهران - کرج (عوارضي قديم)	1395/06/18 06:00:00	60	4542	4271	103	4	39	125	93.65	1005	1402	0	4542
114501	آزادراه تهران - کرج (عوارضي قديم)	1395/06/18 07:00:00	60	5930	5613	155	8	75	79	89.21	1013	2420	0	5930
114501	آزادراه تهران - کرج (عوارضي قديم)	1395/06/18 08:00:00	60	5339	4426	796	5	57	55	85.84	468	2228	0	5339
114501	آزادراه تهران - کرج (عوارضي قديم)	1395/06/18 09:00:00	60	5386	4445	820	8	39	74	94.74	1281	1852	0	5386
114501	آزادراه تهران - کرج (عوارضي قديم)	1395/06/18 10:00:00	60	5827	5262	431	6	38	90	95.72	1434	2451	0	5827
114501	آزادراه تهران - کرج (عوارضي قديم)	1395/06/18 11:00:00	60	5909	5496	304	5	26	78	99.01	1800	2375	0	5909
114501	آزادراه تهران - کرج (عوارضي قديم)	1395/06/18 12:00:00	60	6225	5988	114	7	38	78	98.66	1921	2569	0	6225
114501	آزادراه تهران - کرج (عوارضي قديم)	1395/06/18 13:00:00	60	6595	6365	96	7	34	93	97	1870	2684	0	6595
114501	آزادراه تهران - کرج (عوارضي قديم)	1395/06/18 14:00:00	60	6799	6525	138	4	47	85	94.48	1542	2667	0	6799
114501	آزادراه تهران - کرج (عوارضي قديم)	1395/06/18 15:00:00	60	6911	6624	144	7	43	93	93.22	1477	2736	0	6911
114501	آزادراه تهران - کرج (عوارضي قديم)	1395/06/18 16:00:00	60	6290	6052	101	3	58	76	98	1851	2509	0	6290
114501	آزادراه تهران - کرج (عوارضي قديم)	1395/06/18 17:00:00	60	5520	5301	106	3	32	78	99.18	1743	1534	0	5520
114501	آزادراه تهران - کرج (عوارضي قديم)	1395/06/18 18:00:00	60	5744	5550	114	2	27	51	98.2	1688	1608	0	5744
114501	آزادراه تهران - کرج (عوارضي قديم)	1395/06/18 19:00:00	60	5109	4919	79	6	18	87	94.73	1233	1447	0	5109
114501	آزادراه تهران - کرج (عوارضي قديم)	1395/06/18 20:00:00	60	5222	5111	0	0	0	111	84.23	333	1681	0	5222
114501	آزادراه تهران - کرج (عوارضي قديم)	1395/06/18 21:00:00	60	5344	5219	0	0	0	125	85.74	423	1722	0	5344
114501	آزادراه تهران - کرج (عوارضي قديم)	1395/06/18 22:00:00	60	5530	5375	0	0	0	155	84.18	364	1963	0	5530
114501	آزادراه تهران - کرج (عوارضي قديم)	1395/06/18 23:00:00	60	5454	5273	0	0	0	181	85.47	429	2115	0	5454
114501	آزادراه تهران - کرج (عوارضي قديم)	1395/06/19 00:00:00	60	5027	4914	0	0	0	113	86.96	529	1479	0	5027
114501	آزادراه تهران - کرج (عوارضي قديم)	1395/06/19 01:00:00	60	3575	3506	0	0	0	69	91.14	651	905	0	3575
114501	آزادراه تهران - کرج (عوارضي قديم)	1395/06/19 02:00:00	60	1892	1875	0	0	0	17	96.07	497	154	0	1892
114501	آزادراه تهران - کرج (عوارضي قديم)	1395/06/19 03:00:00	60	1257	1236	0	0	0	21	95.75	321	0	0	1257
114501	آزادراه تهران - کرج (عوارضي قديم)	1395/06/19 04:00:00	60	1340	1293	0	0	0	47	97.58	395	72	0	1340
114501	آزادراه تهران - کرج (عوارضي قديم)	1395/06/19 05:00:00	60	1748	1675	0	0	0	73	95.89	462	211	0	1748
114501	آزادراه تهران - کرج (عوارضي قديم)	1395/06/19 06:00:00	60	3245	3103	34	0	13	95	97.32	897	764	0	3245
114501	آزادراه تهران - کرج (عوارضي قديم)	1395/06/19 07:00:00	60	3713	3328	261	7	71	46	92.53	862	899	0	3713
114501	آزادراه تهران - کرج (عوارضي قديم)	1395/06/19 08:00:00	60	3849	2583	1137	5	45	79	93.31	787	903	0	3849
114501	آزادراه تهران - کرج (عوارضي قديم)	1395/06/19 09:00:00	60	4585	3724	733	4	38	86	98.45	1331	1263	0	4585
114501	آزادراه تهران - کرج (عوارضي قديم)	1395/06/19 10:00:00	60	5589	5090	400	2	36	61	96.48	1485	1984	0	5589
114501	آزادراه تهران - کرج (عوارضي قديم)	1395/06/19 11:00:00	60	5993	5597	300	5	21	70	97.46	1641	2460	0	5993
114501	آزادراه تهران - کرج (عوارضي قديم)	1395/06/19 12:00:00	60	6319	6125	113	4	14	63	96.33	1580	2595	0	6319
114501	آزادراه تهران - کرج (عوارضي قديم)	1395/06/19 13:00:00	60	5399	5244	63	2	14	76	103.41	2017	1555	0	5399
114501	آزادراه تهران - کرج (عوارضي قديم)	1395/06/19 14:00:00	60	4961	4808	66	0	19	68	106.98	2103	1413	0	4961
114501	آزادراه تهران - کرج (عوارضي قديم)	1395/06/19 15:00:00	60	5153	4957	95	2	25	74	104.97	2059	1453	0	5153
114501	آزادراه تهران - کرج (عوارضي قديم)	1395/06/19 16:00:00	60	5422	5207	78	6	64	67	102.37	1980	1520	0	5422
114501	آزادراه تهران - کرج (عوارضي قديم)	1395/06/19 17:00:00	60	5405	5244	80	4	12	65	100.72	1827	1522	0	5405
114501	آزادراه تهران - کرج (عوارضي قديم)	1395/06/19 18:00:00	60	5591	5420	81	5	17	68	98.41	1639	1565	0	5591
114501	آزادراه تهران - کرج (عوارضي قديم)	1395/06/19 19:00:00	60	5129	4956	87	2	19	65	93.25	1084	1807	0	5129
114501	آزادراه تهران - کرج (عوارضي قديم)	1395/06/19 20:00:00	60	5073	4969	0	0	0	104	84.2	345	1474	0	5073
114501	آزادراه تهران - کرج (عوارضي قديم)	1395/06/19 21:00:00	60	4577	4464	0	0	0	113	88.44	585	1332	0	4577
114501	آزادراه تهران - کرج (عوارضي قديم)	1395/06/19 22:00:00	60	4798	4665	0	0	0	133	88.47	645	1398	0	4798
114501	آزادراه تهران - کرج (عوارضي قديم)	1395/06/19 23:00:00	60	5291	5127	0	0	0	164	86.96	560	1900	0	5291
114501	آزادراه تهران - کرج (عوارضي قديم)	1395/06/20 00:00:00	60	4760	4652	0	0	0	108	89	647	1401	0	4760
114501	آزادراه تهران - کرج (عوارضي قديم)	1395/06/20 01:00:00	60	2674	2632	0	0	0	42	95.41	687	518	0	2674
114501	آزادراه تهران - کرج (عوارضي قديم)	1395/06/20 02:00:00	60	1304	1278	0	0	0	26	97.57	367	65	0	1304
114501	آزادراه تهران - کرج (عوارضي قديم)	1395/06/20 03:00:00	60	797	769	0	0	0	28	98.75	236	1	0	797
114501	آزادراه تهران - کرج (عوارضي قديم)	1395/06/20 04:00:00	60	924	875	0	0	0	49	98.27	271	3	0	924
114501	آزادراه تهران - کرج (عوارضي قديم)	1395/06/20 05:00:00	60	1361	1281	0	0	0	80	98.01	390	70	0	1361
114501	آزادراه تهران - کرج (عوارضي قديم)	1395/06/20 06:00:00	60	4094	3767	132	6	54	135	93.53	884	1221	0	4094
114501	آزادراه تهران - کرج (عوارضي قديم)	1395/06/20 07:00:00	60	5974	5489	301	13	106	65	88.57	990	2474	0	5974
114501	آزادراه تهران - کرج (عوارضي قديم)	1395/06/20 08:00:00	60	5153	3651	1371	9	54	68	85.67	517	2132	0	5153
114501	آزادراه تهران - کرج (عوارضي قديم)	1395/06/20 09:00:00	60	5390	4183	1029	9	65	104	95.22	1275	1827	0	5390
114501	آزادراه تهران - کرج (عوارضي قديم)	1395/06/20 10:00:00	60	5460	4879	460	7	27	87	96.74	1475	2040	0	5460
114501	آزادراه تهران - کرج (عوارضي قديم)	1395/06/20 11:00:00	60	5306	4781	406	6	32	81	102.75	1872	1577	0	5306
114501	آزادراه تهران - کرج (عوارضي قديم)	1395/06/20 12:00:00	60	5049	4815	114	4	23	93	105.74	2009	1452	0	5049
114501	آزادراه تهران - کرج (عوارضي قديم)	1395/06/20 13:00:00	60	4906	4713	81	5	22	85	105.97	2011	1403	0	4906
114501	آزادراه تهران - کرج (عوارضي قديم)	1395/06/20 14:00:00	60	5516	5120	169	12	69	146	104.69	2159	1738	0	5516
114501	آزادراه تهران - کرج (عوارضي قديم)	1395/06/20 15:00:00	60	5998	5636	197	6	42	117	100.4	2004	2071	0	5998
114501	آزادراه تهران - کرج (عوارضي قديم)	1395/06/20 16:00:00	60	6788	6323	241	8	98	118	94.48	1548	2669	0	6788
114501	آزادراه تهران - کرج (عوارضي قديم)	1395/06/20 17:00:00	60	6828	6392	234	9	60	133	86.87	635	2594	0	6828
114501	آزادراه تهران - کرج (عوارضي قديم)	1395/06/20 18:00:00	60	6709	6271	254	9	69	106	90.5	1005	2399	0	6709
114501	آزادراه تهران - کرج (عوارضي قديم)	1395/06/20 19:00:00	60	6054	5806	111	6	39	92	88.48	747	2240	0	6054
114501	آزادراه تهران - کرج (عوارضي قديم)	1395/06/20 20:00:00	60	5773	5638	0	0	0	135	82.06	220	2031	0	5773
114501	آزادراه تهران - کرج (عوارضي قديم)	1395/06/20 21:00:00	45	4329	4198	0	0	0	131	83.06	221	1604	0	5771
114501	آزادراه تهران - کرج (عوارضي قديم)	1395/06/20 22:00:00	60	4580	4450	0	0	0	130	90.96	776	1336	0	4580
114501	آزادراه تهران - کرج (عوارضي قديم)	1395/06/20 23:00:00	60	4275	4123	0	0	0	152	89.36	608	1185	0	4275
114501	آزادراه تهران - کرج (عوارضي قديم)	1395/06/21 00:00:00	60	3274	3184	0	0	0	90	92.04	629	765	0	3274
114501	آزادراه تهران - کرج (عوارضي قديم)	1395/06/21 01:00:00	60	2063	2004	0	0	0	59	94.53	498	226	0	2063
114501	آزادراه تهران - کرج (عوارضي قديم)	1395/06/21 02:00:00	60	1149	1130	0	0	0	19	97.51	330	1	0	1149
114501	آزادراه تهران - کرج (عوارضي قديم)	1395/06/21 03:00:00	60	713	696	0	0	0	17	97.75	203	1	0	713
114501	آزادراه تهران - کرج (عوارضي قديم)	1395/06/21 04:00:00	60	919	875	0	0	0	44	97.74	269	0	0	919
114501	آزادراه تهران - کرج (عوارضي قديم)	1395/06/21 05:00:00	60	1478	1405	0	0	0	73	97.27	415	70	0	1478
114501	آزادراه تهران - کرج (عوارضي قديم)	1395/06/21 06:00:00	60	4069	3769	128	8	49	115	95.04	971	1205	0	4069
114501	آزادراه تهران - کرج (عوارضي قديم)	1395/06/21 07:00:00	60	5444	4879	387	21	93	64	88.82	1051	2177	0	5444
114501	آزادراه تهران - کرج (عوارضي قديم)	1395/06/21 08:00:00	60	4952	3261	1513	6	76	96	87.07	602	1829	0	4952
114501	آزادراه تهران - کرج (عوارضي قديم)	1395/06/21 09:00:00	60	5241	4175	915	5	49	97	95.73	1274	1680	0	5241
114501	آزادراه تهران - کرج (عوارضي قديم)	1395/06/21 10:00:00	60	5516	4926	469	5	20	96	96.98	1508	2303	0	5516
114501	آزادراه تهران - کرج (عوارضي قديم)	1395/06/21 11:00:00	60	5400	4874	407	6	34	79	102.96	1924	1752	0	5400
114501	آزادراه تهران - کرج (عوارضي قديم)	1395/06/21 12:00:00	60	5396	5148	146	5	18	79	105.22	2119	1740	0	5396
114501	آزادراه تهران - کرج (عوارضي قديم)	1395/06/21 13:00:00	45	4335	4147	96	4	23	65	103.25	1620	1430	0	5779
114501	آزادراه تهران - کرج (عوارضي قديم)	1395/06/21 14:00:00	60	6204	5825	194	10	53	122	101.23	2162	2501	0	6204
114501	آزادراه تهران - کرج (عوارضي قديم)	1395/06/21 15:00:00	45	5155	4870	134	9	48	94	94.99	1211	2194	0	6873
114501	آزادراه تهران - کرج (عوارضي قديم)	1395/06/21 16:00:00	60	6920	6465	223	8	106	118	92.47	1337	2721	0	6920
114501	آزادراه تهران - کرج (عوارضي قديم)	1395/06/21 17:00:00	60	5607	5283	173	5	52	94	90.29	920	1510	0	5607
114501	آزادراه تهران - کرج (عوارضي قديم)	1395/06/21 18:00:00	60	6581	6226	228	5	48	74	89.86	971	2143	0	6581
114501	آزادراه تهران - کرج (عوارضي قديم)	1395/06/21 19:00:00	60	5301	5083	94	8	30	86	91.1	956	1483	0	5301
114501	آزادراه تهران - کرج (عوارضي قديم)	1395/06/21 20:00:00	60	6396	6218	0	0	0	178	76.11	26	2538	0	6396
114501	آزادراه تهران - کرج (عوارضي قديم)	1395/06/21 21:00:00	60	6516	6344	0	0	0	172	77.89	52	2746	0	6516
114501	آزادراه تهران - کرج (عوارضي قديم)	1395/06/21 22:00:00	60	5814	5623	0	0	0	191	81.6	352	2214	0	5814
114501	آزادراه تهران - کرج (عوارضي قديم)	1395/06/21 23:00:00	60	5258	5056	0	0	0	202	83.11	377	1545	0	5258
114501	آزادراه تهران - کرج (عوارضي قديم)	1395/06/22 00:00:00	60	4642	4531	0	0	0	111	88.65	612	1362	0	4642
114501	آزادراه تهران - کرج (عوارضي قديم)	1395/06/22 01:00:00	60	3303	3222	0	0	0	81	94.41	761	774	0	3303
114501	آزادراه تهران - کرج (عوارضي قديم)	1395/06/22 02:00:00	60	1867	1839	0	0	0	28	97.67	522	146	0	1867
114501	آزادراه تهران - کرج (عوارضي قديم)	1395/06/22 03:00:00	60	1235	1219	0	0	0	16	98.46	364	0	0	1235
114501	آزادراه تهران - کرج (عوارضي قديم)	1395/06/22 04:00:00	60	1455	1413	0	0	0	42	97.94	434	5	0	1455
114501	آزادراه تهران - کرج (عوارضي قديم)	1395/06/22 05:00:00	60	1909	1848	0	0	0	61	96.75	519	286	0	1909
114501	آزادراه تهران - کرج (عوارضي قديم)	1395/06/22 06:00:00	60	3277	3131	52	2	16	76	97.08	908	775	0	3277
114501	آزادراه تهران - کرج (عوارضي قديم)	1395/06/22 07:00:00	60	3578	3230	253	5	52	38	92.74	815	844	0	3578
114501	آزادراه تهران - کرج (عوارضي قديم)	1395/06/22 08:00:00	60	3561	2100	1353	2	40	66	95.39	890	839	0	3561
114501	آزادراه تهران - کرج (عوارضي قديم)	1395/06/22 09:00:00	60	4112	3244	772	2	25	69	101.94	1414	977	0	4112
114501	آزادراه تهران - کرج (عوارضي قديم)	1395/06/22 10:00:00	60	5112	4570	438	4	29	71	98.98	1558	1618	0	5112
114501	آزادراه تهران - کرج (عوارضي قديم)	1395/06/22 11:00:00	60	5877	5424	370	2	24	57	100.8	1943	2429	0	5877
114501	آزادراه تهران - کرج (عوارضي قديم)	1395/06/22 12:00:00	60	5659	5439	133	4	16	67	103.73	2088	2013	0	5659
114501	آزادراه تهران - کرج (عوارضي قديم)	1395/06/22 13:00:00	60	4872	4742	63	3	16	48	106.67	2076	1413	0	4872
114501	آزادراه تهران - کرج (عوارضي قديم)	1395/06/22 14:00:00	60	4581	4425	66	2	25	63	108.73	2017	1306	0	4581
114501	آزادراه تهران - کرج (عوارضي قديم)	1395/06/22 15:00:00	60	4696	4497	101	1	37	60	106.71	1996	1338	0	4696
114501	آزادراه تهران - کرج (عوارضي قديم)	1395/06/22 16:00:00	60	5174	4972	83	2	58	59	103.43	1955	1460	0	5174
114501	آزادراه تهران - کرج (عوارضي قديم)	1395/06/22 17:00:00	60	5221	5064	85	2	21	49	101.51	1832	1472	0	5221
114501	آزادراه تهران - کرج (عوارضي قديم)	1395/06/22 18:00:00	60	5484	5274	141	5	15	49	98.92	1625	1525	0	5484
114501	آزادراه تهران - کرج (عوارضي قديم)	1395/06/22 19:00:00	60	5018	4868	73	1	20	56	92.98	1033	1433	0	5018
114501	آزادراه تهران - کرج (عوارضي قديم)	1395/06/22 20:00:00	60	4931	4841	0	0	0	90	85.39	446	1444	0	4931
114501	آزادراه تهران - کرج (عوارضي قديم)	1395/06/22 21:00:00	60	4354	4269	0	0	0	85	89.74	673	1268	0	4354
114501	آزادراه تهران - کرج (عوارضي قديم)	1395/06/22 22:00:00	60	4643	4529	0	0	0	114	88.19	594	1363	0	4643
114501	آزادراه تهران - کرج (عوارضي قديم)	1395/06/22 23:00:00	60	5678	5528	0	0	0	150	81.39	224	2347	0	5678
114501	آزادراه تهران - کرج (عوارضي قديم)	1395/06/23 00:00:00	60	4965	4862	0	0	0	103	86.42	502	1818	0	4965
114501	آزادراه تهران - کرج (عوارضي قديم)	1395/06/23 01:00:00	60	2933	2903	0	0	0	30	93.56	650	624	0	2933
114501	آزادراه تهران - کرج (عوارضي قديم)	1395/06/23 02:00:00	60	1211	1191	0	0	0	20	95.91	319	0	0	1211
114501	آزادراه تهران - کرج (عوارضي قديم)	1395/06/23 03:00:00	60	700	676	0	0	0	24	98.95	209	0	0	700
114501	آزادراه تهران - کرج (عوارضي قديم)	1395/06/23 04:00:00	60	888	830	0	0	0	58	98.19	257	2	0	888
114501	آزادراه تهران - کرج (عوارضي قديم)	1395/06/23 05:00:00	60	1414	1346	0	0	0	68	97.59	397	7	0	1414
114501	آزادراه تهران - کرج (عوارضي قديم)	1395/06/23 06:00:00	60	4147	3821	129	1	54	142	92.69	832	1262	0	4147
114501	آزادراه تهران - کرج (عوارضي قديم)	1395/06/23 07:00:00	60	5794	5316	285	22	95	76	84.08	858	2374	0	5794
114501	آزادراه تهران - کرج (عوارضي قديم)	1395/06/23 08:00:00	60	5038	3657	1218	6	62	95	85.02	457	1919	0	5038
114501	آزادراه تهران - کرج (عوارضي قديم)	1395/06/23 09:00:00	60	5250	4194	916	10	39	91	95.67	1285	1709	0	5250
114501	آزادراه تهران - کرج (عوارضي قديم)	1395/06/23 10:00:00	60	5333	4736	473	6	28	90	97.75	1538	1991	0	5333
114501	آزادراه تهران - کرج (عوارضي قديم)	1395/06/23 11:00:00	60	4989	4534	357	3	20	75	103.76	1861	1485	0	4989
114501	آزادراه تهران - کرج (عوارضي قديم)	1395/06/23 12:00:00	60	4961	4758	115	4	11	73	106.46	1999	1424	0	4961
114501	آزادراه تهران - کرج (عوارضي قديم)	1395/06/23 13:00:00	60	4945	4750	83	2	16	94	106.22	2044	1407	0	4945
114501	آزادراه تهران - کرج (عوارضي قديم)	1395/06/23 14:00:00	60	5491	5133	163	6	59	130	104.72	2158	1729	0	5491
114501	آزادراه تهران - کرج (عوارضي قديم)	1395/06/23 15:00:00	60	5910	5563	185	10	40	112	101.44	2063	2193	0	5910
114501	آزادراه تهران - کرج (عوارضي قديم)	1395/06/23 16:00:00	60	6847	6378	226	9	94	140	95.11	1580	2855	0	6847
114501	آزادراه تهران - کرج (عوارضي قديم)	1395/06/23 17:00:00	60	6493	6090	219	5	64	115	95.21	1552	2496	0	6493
114501	آزادراه تهران - کرج (عوارضي قديم)	1395/06/23 18:00:00	60	6401	5961	266	8	68	98	79.59	795	2175	0	6401
114501	آزادراه تهران - کرج (عوارضي قديم)	1395/06/23 19:00:00	60	5839	5589	110	7	30	103	82.7	419	1966	0	5839
114501	آزادراه تهران - کرج (عوارضي قديم)	1395/06/23 20:00:00	60	6426	6249	0	0	0	177	78.98	61	2620	0	6426
114501	آزادراه تهران - کرج (عوارضي قديم)	1395/06/23 21:00:00	60	5955	5798	0	0	0	157	83.65	349	2472	0	5955
114501	آزادراه تهران - کرج (عوارضي قديم)	1395/06/23 22:00:00	60	4759	4630	0	0	0	129	89.72	734	1392	0	4759
114501	آزادراه تهران - کرج (عوارضي قديم)	1395/06/23 23:00:00	60	4258	4113	0	0	0	145	88.96	580	1180	0	4258
114501	آزادراه تهران - کرج (عوارضي قديم)	1395/06/24 00:00:00	60	3272	3191	0	0	0	81	93.85	726	765	0	3272
114501	آزادراه تهران - کرج (عوارضي قديم)	1395/06/24 01:00:00	60	2200	2132	0	0	0	68	95.57	565	365	0	2200
114501	آزادراه تهران - کرج (عوارضي قديم)	1395/06/24 02:00:00	60	1123	1093	0	0	0	30	96.57	310	3	0	1123
114501	آزادراه تهران - کرج (عوارضي قديم)	1395/06/24 03:00:00	60	723	700	0	0	0	23	97.99	208	0	0	723
114501	آزادراه تهران - کرج (عوارضي قديم)	1395/06/24 04:00:00	60	985	945	0	0	0	40	98.02	284	2	0	985
114501	آزادراه تهران - کرج (عوارضي قديم)	1395/06/24 05:00:00	60	1475	1405	0	0	0	70	97.19	400	10	0	1475
114501	آزادراه تهران - کرج (عوارضي قديم)	1395/06/24 06:00:00	60	4204	3903	119	5	36	141	94.09	939	1324	0	4204
114501	آزادراه تهران - کرج (عوارضي قديم)	1395/06/24 07:00:00	60	5527	4995	324	15	91	102	86.91	1058	2251	0	5527
114501	آزادراه تهران - کرج (عوارضي قديم)	1395/06/24 08:00:00	60	5019	3205	1638	12	65	99	85.83	592	2118	0	5019
114501	آزادراه تهران - کرج (عوارضي قديم)	1395/06/24 09:00:00	60	5240	4049	1036	5	59	91	96.97	1424	1661	0	5240
114501	آزادراه تهران - کرج (عوارضي قديم)	1395/06/24 10:00:00	60	5304	4730	456	3	29	86	97.49	1483	1999	0	5304
114501	آزادراه تهران - کرج (عوارضي قديم)	1395/06/24 11:00:00	60	5327	4830	378	5	29	85	102.55	1859	1884	0	5327
114501	آزادراه تهران - کرج (عوارضي قديم)	1395/06/24 12:00:00	60	5326	5091	133	2	15	85	105.5	2073	1536	0	5326
114501	آزادراه تهران - کرج (عوارضي قديم)	1395/06/24 13:00:00	60	5292	5075	93	3	26	95	104.47	2056	1521	0	5292
114501	آزادراه تهران - کرج (عوارضي قديم)	1395/06/24 14:00:00	60	6025	5662	174	6	66	117	102.14	2151	2078	0	6025
114501	آزادراه تهران - کرج (عوارضي قديم)	1395/06/24 15:00:00	60	6476	6127	178	5	61	105	99.4	2066	2594	0	6476
114501	آزادراه تهران - کرج (عوارضي قديم)	1395/06/24 16:00:00	60	6888	6381	262	8	112	125	91.44	1197	2815	0	6888
114501	آزادراه تهران - کرج (عوارضي قديم)	1395/06/24 17:00:00	60	8014	7560	250	16	78	110	94.37	1799	3087	0	8014
114501	آزادراه تهران - کرج (عوارضي قديم)	1395/06/24 18:00:00	60	6292	5934	208	8	53	89	93.48	1321	2262	0	6292
114501	آزادراه تهران - کرج (عوارضي قديم)	1395/06/24 19:00:00	60	5680	5447	92	7	24	110	89.5	785	2131	0	5680
114501	آزادراه تهران - کرج (عوارضي قديم)	1395/06/24 20:00:00	60	6144	5976	0	0	0	168	80.49	91	2471	0	6144
114501	آزادراه تهران - کرج (عوارضي قديم)	1395/06/24 21:00:00	60	6138	5952	0	0	0	186	82.24	173	2509	0	6138
114501	آزادراه تهران - کرج (عوارضي قديم)	1395/06/24 22:00:00	60	5274	5145	0	0	0	129	87.49	588	1873	0	5274
114501	آزادراه تهران - کرج (عوارضي قديم)	1395/06/24 23:00:00	60	4823	4664	0	0	0	159	86.39	473	1405	0	4823
114501	آزادراه تهران - کرج (عوارضي قديم)	1395/06/25 00:00:00	60	3990	3885	0	0	0	105	90.95	705	1059	0	3990
114501	آزادراه تهران - کرج (عوارضي قديم)	1395/06/25 01:00:00	60	2614	2564	0	0	0	50	94.1	606	504	0	2614
114501	آزادراه تهران - کرج (عوارضي قديم)	1395/06/25 02:00:00	60	1420	1399	0	0	0	21	96	380	2	0	1420
114501	آزادراه تهران - کرج (عوارضي قديم)	1395/06/25 03:00:00	60	957	936	0	0	0	21	98.74	286	2	0	957
114501	آزادراه تهران - کرج (عوارضي قديم)	1395/06/25 04:00:00	60	1184	1145	0	0	0	39	97.5	330	0	0	1184
114501	آزادراه تهران - کرج (عوارضي قديم)	1395/06/25 05:00:00	60	1768	1705	0	0	0	63	98.26	519	139	0	1768
114501	آزادراه تهران - کرج (عوارضي قديم)	1395/06/25 06:00:00	60	3928	3700	75	5	29	119	95.7	980	990	0	3928
114501	آزادراه تهران - کرج (عوارضي قديم)	1395/06/25 07:00:00	60	4446	4025	279	12	59	71	94.61	1227	1139	0	4446
114501	آزادراه تهران - کرج (عوارضي قديم)	1395/06/25 08:00:00	60	4593	2858	1596	4	47	88	87.91	635	1547	0	4593
114501	آزادراه تهران - کرج (عوارضي قديم)	1395/06/25 09:00:00	60	5186	3961	1101	3	51	70	98	1509	1492	0	5186
114501	آزادراه تهران - کرج (عوارضي قديم)	1395/06/25 10:00:00	60	5384	4735	542	3	26	78	98.49	1640	2026	0	5384
114501	آزادراه تهران - کرج (عوارضي قديم)	1395/06/25 11:00:00	60	5558	5060	392	5	33	68	102.01	1915	2197	0	5558
114501	آزادراه تهران - کرج (عوارضي قديم)	1395/06/25 12:00:00	60	5985	5655	190	6	32	102	102.91	2140	2456	0	5985
114501	آزادراه تهران - کرج (عوارضي قديم)	1395/06/25 13:00:00	60	6390	6154	101	2	34	99	98.46	1946	2623	0	6390
114501	آزادراه تهران - کرج (عوارضي قديم)	1395/06/25 14:00:00	60	6599	6333	128	2	46	90	99.22	2040	2640	0	6599
114501	آزادراه تهران - کرج (عوارضي قديم)	1395/06/25 15:00:00	60	6597	6311	136	1	48	101	97.97	1936	2628	0	6597
114501	آزادراه تهران - کرج (عوارضي قديم)	1395/06/25 16:00:00	60	6042	5815	110	2	53	62	98.26	1774	2250	0	6042
114501	آزادراه تهران - کرج (عوارضي قديم)	1395/06/25 17:00:00	60	5930	5694	109	9	30	88	97.98	1702	2185	0	5930
114501	آزادراه تهران - کرج (عوارضي قديم)	1395/06/25 18:00:00	60	5730	5551	87	8	26	58	98.21	1680	1967	0	5730
114501	آزادراه تهران - کرج (عوارضي قديم)	1395/06/25 19:00:00	60	5238	5054	76	1	21	86	90.83	887	1661	0	5238
114501	آزادراه تهران - کرج (عوارضي قديم)	1395/06/25 20:00:00	60	5380	5263	0	0	0	117	84.41	357	1896	0	5380
114501	آزادراه تهران - کرج (عوارضي قديم)	1395/06/25 21:00:00	60	4905	4778	0	0	0	127	86.93	541	1420	0	4905
114501	آزادراه تهران - کرج (عوارضي قديم)	1395/06/25 22:00:00	60	4970	4853	0	0	0	117	87.45	570	1445	0	4970
114501	آزادراه تهران - کرج (عوارضي قديم)	1395/06/25 23:00:00	60	5446	5283	0	0	0	163	82.97	300	1757	0	5446
114501	آزادراه تهران - کرج (عوارضي قديم)	1395/06/26 00:00:00	60	5080	4955	0	0	0	125	86.96	544	1669	0	5080
114501	آزادراه تهران - کرج (عوارضي قديم)	1395/06/26 01:00:00	60	3747	3682	0	0	0	65	92.14	728	1008	0	3747
114501	آزادراه تهران - کرج (عوارضي قديم)	1395/06/26 02:00:00	60	1948	1929	0	0	0	19	95.97	501	278	0	1948
114501	آزادراه تهران - کرج (عوارضي قديم)	1395/06/26 03:00:00	60	1070	1044	0	0	0	26	97.12	291	1	0	1070
114501	آزادراه تهران - کرج (عوارضي قديم)	1395/06/26 04:00:00	60	1090	1053	0	0	0	37	97.97	311	2	0	1090
114501	آزادراه تهران - کرج (عوارضي قديم)	1395/06/26 05:00:00	60	1263	1200	0	0	0	63	97.73	358	5	0	1263
114501	آزادراه تهران - کرج (عوارضي قديم)	1395/06/26 06:00:00	60	2389	2273	31	2	6	77	99.97	731	382	0	2389
114501	آزادراه تهران - کرج (عوارضي قديم)	1395/06/26 07:00:00	60	2902	2550	259	6	31	56	94.46	735	671	0	2902
114501	آزادراه تهران - کرج (عوارضي قديم)	1395/06/26 08:00:00	60	3438	1872	1440	3	31	92	93.8	795	787	0	3438
114501	آزادراه تهران - کرج (عوارضي قديم)	1395/06/26 09:00:00	60	4138	3062	958	3	33	82	100.43	1352	1130	0	4138
114501	آزادراه تهران - کرج (عوارضي قديم)	1395/06/26 10:00:00	60	5154	4539	509	1	30	75	98.47	1539	1643	0	5154
114501	آزادراه تهران - کرج (عوارضي قديم)	1395/06/26 11:00:00	60	5648	5157	382	3	25	81	101	1877	2170	0	5648
114501	آزادراه تهران - کرج (عوارضي قديم)	1395/06/26 12:00:00	60	5520	5303	117	4	20	76	102.27	1934	1947	0	5520
114501	آزادراه تهران - کرج (عوارضي قديم)	1395/06/26 13:00:00	60	4899	4767	43	1	17	71	105.71	1963	1406	0	4899
114501	آزادراه تهران - کرج (عوارضي قديم)	1395/06/26 14:00:00	60	4558	4417	63	4	13	61	107.96	1964	1301	0	4558
114501	آزادراه تهران - کرج (عوارضي قديم)	1395/06/26 15:00:00	60	4900	4729	77	2	15	77	105.47	1963	1383	0	4900
114501	آزادراه تهران - کرج (عوارضي قديم)	1395/06/26 16:00:00	60	5157	4989	84	4	15	65	102.93	1909	1455	0	5157
114501	آزادراه تهران - کرج (عوارضي قديم)	1395/06/26 17:00:00	60	4777	4628	67	1	12	69	104.23	1847	1349	0	4777
114501	آزادراه تهران - کرج (عوارضي قديم)	1395/06/26 18:00:00	60	5032	4853	87	4	25	63	102.23	1814	1425	0	5032
114501	آزادراه تهران - کرج (عوارضي قديم)	1395/06/26 19:00:00	60	4303	4162	48	2	15	76	94	954	1231	0	4303
114501	آزادراه تهران - کرج (عوارضي قديم)	1395/06/26 20:00:00	60	4731	4611	0	0	0	120	84.5	338	1382	0	4731
114501	آزادراه تهران - کرج (عوارضي قديم)	1395/06/26 21:00:00	60	4116	4015	0	0	0	101	89.97	657	1207	0	4116
114501	آزادراه تهران - کرج (عوارضي قديم)	1395/06/26 22:00:00	60	4356	4232	0	0	0	124	90.2	696	1270	0	4356
114501	آزادراه تهران - کرج (عوارضي قديم)	1395/06/26 23:00:00	60	5143	4988	0	0	0	155	85.36	445	1680	0	5143
114501	آزادراه تهران - کرج (عوارضي قديم)	1395/06/27 00:00:00	60	4270	4172	0	0	0	98	90.84	717	1200	0	4270
114501	آزادراه تهران - کرج (عوارضي قديم)	1395/06/27 01:00:00	60	2628	2597	0	0	0	31	95.67	650	523	0	2628
114501	آزادراه تهران - کرج (عوارضي قديم)	1395/06/27 02:00:00	60	1218	1201	0	0	0	17	98.17	365	0	0	1218
114501	آزادراه تهران - کرج (عوارضي قديم)	1395/06/27 03:00:00	60	731	706	0	0	0	25	98.71	214	1	0	731
114501	آزادراه تهران - کرج (عوارضي قديم)	1395/06/27 04:00:00	60	788	744	0	0	0	44	99.32	246	0	0	788
114501	آزادراه تهران - کرج (عوارضي قديم)	1395/06/27 05:00:00	60	1270	1194	0	0	0	76	98	367	4	0	1270
114501	آزادراه تهران - کرج (عوارضي قديم)	1395/06/27 06:00:00	60	3862	3577	98	2	32	153	93.56	830	1115	0	3862
114501	آزادراه تهران - کرج (عوارضي قديم)	1395/06/27 07:00:00	60	5917	5471	230	16	105	95	86.75	1095	2463	0	5917
114501	آزادراه تهران - کرج (عوارضي قديم)	1395/06/27 08:00:00	60	5145	3861	1104	3	63	114	82.12	443	2178	0	5145
114501	آزادراه تهران - کرج (عوارضي قديم)	1395/06/27 09:00:00	60	5209	4045	991	8	57	108	96.99	1409	1545	0	5209
114501	آزادراه تهران - کرج (عوارضي قديم)	1395/06/27 10:00:00	60	5185	4563	491	1	43	87	96.93	1428	1666	0	5185
114501	آزادراه تهران - کرج (عوارضي قديم)	1395/06/27 11:00:00	60	5054	4565	366	3	35	85	104.2	1873	1455	0	5054
114501	آزادراه تهران - کرج (عوارضي قديم)	1395/06/27 12:00:00	60	4975	4759	110	4	21	81	105.44	1955	1433	0	4975
114501	آزادراه تهران - کرج (عوارضي قديم)	1395/06/27 13:00:00	60	5032	4827	81	6	24	94	106.21	2075	1431	0	5032
114501	آزادراه تهران - کرج (عوارضي قديم)	1395/06/27 14:00:00	60	5336	4981	150	7	59	139	105.94	2177	1682	0	5336
114501	آزادراه تهران - کرج (عوارضي قديم)	1395/06/27 15:00:00	60	5902	5567	172	5	42	116	103.66	2214	2022	0	5902
114501	آزادراه تهران - کرج (عوارضي قديم)	1395/06/27 16:00:00	60	6796	6328	226	5	93	144	94.6	1549	2682	0	6796
114501	آزادراه تهران - کرج (عوارضي قديم)	1395/06/27 17:00:00	60	6866	6533	165	7	51	110	94.45	1615	2704	0	6866
114501	آزادراه تهران - کرج (عوارضي قديم)	1395/06/27 18:00:00	60	6211	5892	158	8	45	108	94.98	1456	2440	0	6211
114501	آزادراه تهران - کرج (عوارضي قديم)	1395/06/27 19:00:00	60	5388	5186	68	4	30	100	88.99	709	1706	0	5388
114501	آزادراه تهران - کرج (عوارضي قديم)	1395/06/27 20:00:00	60	6500	6301	0	0	0	199	74.99	76	2573	0	6500
114501	آزادراه تهران - کرج (عوارضي قديم)	1395/06/27 21:00:00	60	5731	5572	0	0	0	159	83.94	329	2189	0	5731
114501	آزادراه تهران - کرج (عوارضي قديم)	1395/06/27 22:00:00	60	4500	4378	0	0	0	122	91.23	777	1310	0	4500
114501	آزادراه تهران - کرج (عوارضي قديم)	1395/06/27 23:00:00	60	4069	3935	0	0	0	134	90.46	663	1068	0	4069
114501	آزادراه تهران - کرج (عوارضي قديم)	1395/06/28 00:00:00	60	3127	3035	0	0	0	92	93.54	696	654	0	3127
114501	آزادراه تهران - کرج (عوارضي قديم)	1395/06/28 01:00:00	60	1847	1786	0	0	0	61	95.48	473	147	0	1847
114501	آزادراه تهران - کرج (عوارضي قديم)	1395/06/28 02:00:00	60	1001	991	0	0	0	10	97.4	281	0	0	1001
114501	آزادراه تهران - کرج (عوارضي قديم)	1395/06/28 03:00:00	60	635	618	0	0	0	17	95.97	160	0	0	635
114501	آزادراه تهران - کرج (عوارضي قديم)	1395/06/28 04:00:00	60	729	688	0	0	0	41	97.28	206	0	0	729
114501	آزادراه تهران - کرج (عوارضي قديم)	1395/06/28 05:00:00	60	1233	1159	0	0	0	74	98.19	348	5	0	1233
114501	آزادراه تهران - کرج (عوارضي قديم)	1395/06/28 06:00:00	60	3740	3454	119	2	39	126	94.53	875	1067	0	3740
114501	آزادراه تهران - کرج (عوارضي قديم)	1395/06/28 07:00:00	60	4968	4466	300	19	89	94	89.38	1072	1990	0	4968
114501	آزادراه تهران - کرج (عوارضي قديم)	1395/06/28 08:00:00	60	4462	2503	1796	5	51	107	87.86	675	1618	0	4462
114501	آزادراه تهران - کرج (عوارضي قديم)	1395/06/28 09:00:00	60	5235	3939	1145	0	50	101	96.24	1320	1643	0	5235
114501	آزادراه تهران - کرج (عوارضي قديم)	1395/06/28 10:00:00	60	5204	4562	516	7	42	77	97.97	1470	1841	0	5204
114501	آزادراه تهران - کرج (عوارضي قديم)	1395/06/28 11:00:00	60	5075	4522	435	1	25	92	104.13	1862	1454	0	5075
114501	آزادراه تهران - کرج (عوارضي قديم)	1395/06/28 12:00:00	60	5113	4842	163	6	21	81	106.47	2070	1469	0	5113
114501	آزادراه تهران - کرج (عوارضي قديم)	1395/06/28 13:00:00	60	5203	4978	100	2	29	94	104.24	2009	1482	0	5203
114501	آزادراه تهران - کرج (عوارضي قديم)	1395/06/28 14:00:00	60	5663	5300	170	12	56	125	104.38	2181	1784	0	5663
114501	آزادراه تهران - کرج (عوارضي قديم)	1395/06/28 15:00:00	30	3022	2873	72	4	20	53	101.97	1075	1215	0	6044
114501	آزادراه تهران - کرج (عوارضي قديم)	1395/06/28 16:00:00	45	5033	4620	187	5	103	118	92	880	2107	0	6710
114501	آزادراه تهران - کرج (عوارضي قديم)	1395/06/28 17:00:00	60	6410	5953	266	10	61	120	93.73	1344	2471	0	6410
114501	آزادراه تهران - کرج (عوارضي قديم)	1395/06/28 18:00:00	60	6465	5964	319	7	65	110	91.42	1095	2280	0	6465
114501	آزادراه تهران - کرج (عوارضي قديم)	1395/06/28 19:00:00	60	5883	5658	80	0	32	113	86.28	524	2011	0	5883
114501	آزادراه تهران - کرج (عوارضي قديم)	1395/06/28 20:00:00	45	4867	4718	0	0	0	149	77.3	24	1949	0	6489
114501	آزادراه تهران - کرج (عوارضي قديم)	1395/06/28 21:00:00	15	1589	1543	0	0	0	46	81	32	640	0	6356
114501	آزادراه تهران - کرج (عوارضي قديم)	1395/06/29 22:00:00	60	5986	5808	0	0	0	178	81.47	171	2447	0	5986
114501	آزادراه تهران - کرج (عوارضي قديم)	1395/06/29 23:00:00	60	5440	5267	0	0	0	173	84.73	365	2254	0	5440
114501	آزادراه تهران - کرج (عوارضي قديم)	1395/06/30 00:00:00	15	1356	1319	0	0	0	37	84	93	568	0	5424
114501	آزادراه تهران - کرج (عوارضي قديم)	1395/06/30 01:00:00	15	795	780	0	0	0	15	93	163	186	0	3180
114501	آزادراه تهران - کرج (عوارضي قديم)	1395/06/30 02:00:00	15	655	641	0	0	0	14	95	171	155	0	2620
114501	آزادراه تهران - کرج (عوارضي قديم)	1395/06/30 14:00:00	60	4129	3971	79	4	17	58	107.38	1754	1179	0	4129
114501	آزادراه تهران - کرج (عوارضي قديم)	1395/06/30 15:00:00	60	4863	4682	87	3	19	72	106.74	2037	1385	0	4863
114501	آزادراه تهران - کرج (عوارضي قديم)	1395/06/30 16:00:00	60	5621	5442	100	0	18	61	100.16	1856	1772	0	5621
114501	آزادراه تهران - کرج (عوارضي قديم)	1395/06/30 17:00:00	60	5481	5253	123	3	30	72	100.48	1828	1537	0	5481
114501	آزادراه تهران - کرج (عوارضي قديم)	1395/06/30 18:00:00	60	5742	5518	149	2	18	55	95.93	1469	1782	0	5742
114501	آزادراه تهران - کرج (عوارضي قديم)	1395/06/30 19:00:00	60	5278	5133	42	1	16	86	89.24	765	1692	0	5278
114501	آزادراه تهران - کرج (عوارضي قديم)	1395/06/30 20:00:00	60	4936	4824	0	0	0	112	86.24	474	1444	0	4936
114501	آزادراه تهران - کرج (عوارضي قديم)	1395/06/30 21:00:00	30	2288	2243	0	0	0	45	88.49	304	667	0	4576
114501	آزادراه تهران - کرج (عوارضي قديم)	1395/06/30 22:00:00	45	3835	3730	0	0	0	105	87.66	449	1119	0	5113
114501	آزادراه تهران - کرج (عوارضي قديم)	1395/06/30 23:00:00	60	6027	5847	0	0	0	180	76.53	114	2439	0	6027
114501	آزادراه تهران - کرج (عوارضي قديم)	1395/06/31 00:00:00	15	571	568	0	0	0	3	96	156	77	0	2284
114501	آزادراه تهران - کرج (عوارضي قديم)	1395/06/31 01:00:00	30	795	773	0	0	0	22	98	221	4	0	1590
114501	آزادراه تهران - کرج (عوارضي قديم)	1395/06/31 02:00:00	45	467	450	0	0	0	17	98.97	134	0	0	622
114501	آزادراه تهران - کرج (عوارضي قديم)	1395/06/31 03:00:00	60	564	530	0	0	0	34	99.51	171	1	0	564
114501	آزادراه تهران - کرج (عوارضي قديم)	1395/06/31 04:00:00	30	327	294	0	0	0	33	98.56	96	0	0	654
114501	آزادراه تهران - کرج (عوارضي قديم)	1395/06/31 05:00:00	30	772	719	13	2	3	35	101.22	261	2	0	1544
114501	آزادراه تهران - کرج (عوارضي قديم)	1395/06/31 06:00:00	45	2694	2410	155	7	46	76	94.57	806	619	0	3591
114501	آزادراه تهران - کرج (عوارضي قديم)	1395/06/31 07:00:00	45	3706	1938	1593	3	77	95	92.73	741	1268	0	4941
114501	آزادراه تهران - کرج (عوارضي قديم)	1395/06/31 08:00:00	60	4926	3836	930	5	58	97	95.76	1265	1404	0	4926
114501	آزادراه تهران - کرج (عوارضي قديم)	1395/06/31 09:00:00	60	5044	4418	511	9	27	79	100.21	1617	1591	0	5044
114501	آزادراه تهران - کرج (عوارضي قديم)	1395/06/31 10:00:00	60	4813	4309	402	7	17	78	106.28	1913	1390	0	4813
114501	آزادراه تهران - کرج (عوارضي قديم)	1395/06/31 11:00:00	60	5000	4731	133	6	33	97	105.48	1978	1434	0	5000
114501	آزادراه تهران - کرج (عوارضي قديم)	1395/06/31 12:00:00	60	4787	4605	72	6	23	81	106.5	2011	1374	0	4787
114501	آزادراه تهران - کرج (عوارضي قديم)	1395/06/31 13:00:00	60	4881	4690	78	4	27	82	106.98	2089	1392	0	4881
114501	آزادراه تهران - کرج (عوارضي قديم)	1395/06/31 14:00:00	60	5727	5358	180	17	58	114	104.36	2210	2138	0	5727
114501	آزادراه تهران - کرج (عوارضي قديم)	1395/06/31 15:00:00	60	5893	5601	149	5	39	99	100.76	2006	2191	0	5893
114501	آزادراه تهران - کرج (عوارضي قديم)	1395/06/31 16:00:00	60	6209	5673	295	11	65	165	98.67	1858	2261	0	6209
114501	آزادراه تهران - کرج (عوارضي قديم)	1395/06/31 17:00:00	60	6315	5969	216	6	45	79	94.72	1481	2465	0	6315
114501	آزادراه تهران - کرج (عوارضي قديم)	1395/06/31 18:00:00	60	6229	6012	69	1	21	126	82.2	334	2317	0	6229
114501	آزادراه تهران - کرج (عوارضي قديم)	1395/06/31 19:00:00	60	6133	5970	0	0	0	163	79.09	88	2485	0	6133
114501	آزادراه تهران - کرج (عوارضي قديم)	1395/06/31 20:00:00	60	6348	6166	0	0	0	182	80.15	112	2595	0	6348
114501	آزادراه تهران - کرج (عوارضي قديم)	1395/06/31 21:00:00	60	5223	5084	0	0	0	139	87.59	585	1702	0	5223
114501	آزادراه تهران - کرج (عوارضي قديم)	1395/06/31 22:00:00	60	4235	4097	0	0	0	138	91.24	767	1229	0	4235
114501	آزادراه تهران - کرج (عوارضي قديم)	1395/06/31 23:00:00	60	4136	4021	0	0	0	115	90.38	663	1155	0	4136

## Sheet: Sheet3
			سرعت متوسط	تعداد برگزیده	چگالی
						1	1	1	1	1	1	1	1	1	1	1	1	1	1	1	1	1	1	1	1	1	1	1	1	2	2	2	2	2	2	2	2	2	2	2	2	2	2	2	2	2	2	2	2
						1	2	3	4	5	6	7	8	9	10	11	12	13	14	15	16	17	18	19	20	21	22	23	24	1	2	3	4	5	6	7	8	9	10	11	12	13	14	15	16	17	18	19	20
						2906	1759	904	542	707	1175	3851	5545	5122	5082	5212	4960	5094	4907	5433	5946	6695	6643	6490	6786	5943	6362	5575	4031	3259	1905	978	582	721	1229	4121	5309	5203	5241	5189	5286	4941	4862	5542	6361	6955	6704	6782	6516
			svuj	dsad		0	0	0	0	0	0	0	1	1	1	1	1	1	1	1	1	1	1	1	0	0	0	0	0	0	0	0	0	0	0	0	1	1	1	1	1	1	1	1	1	1	1	1	0
1	1	0	95.6	2906	30.3975	30.3975		0	0	0	0	0	0	0	1	1	1	1	1	1	1	1	1	1	1	1	0	0	0	0	0	0	0	0	0	0	0	0	1	1	1	1	1	1	1	1	1	1	1
1	2	0	97.05	1759	18.1247	18.1247		95.6	97.05	97.15	98.79	98.51	99.59	100.27	94.37	94.98	97.76	97.92	104.53	105.05	106.52	106.21	102.29	92.56	94.62	93.45	85.75	80.84	82.68	86.04	92.58	94.08	96.28	98.88	98.58	98.79	97.57	100.13	93.97	93.72	97.14	97.66	104.93	105.63	106.68	105.59	100.48	95.51	93.39
1	3	0	97.15	904	9.3052	9.3052		30.3975	18.1247	9.3052	5.48639	7.17694	11.7984	38.4063	58.7581	53.9271	51.9845	53.2271	47.4505	48.4912	46.0665	51.1534	58.1288	72.3315	70.2071	69.4489	79.137	73.5156	76.9473	64.7954	43.5407	34.6407	19.786	9.89078	5.90383	7.29831	12.5961	41.1565	56.4968	55.5164	53.9531	53.1333	50.3764	46.7765	45.5756	52.486	63.3061	72.8196	71.785
1	4	0	98.79	542	5.48639	5.48639		0	0	0	0	0	0	0	1	1	1	1	1	1	1	1	1	1	1	1	0	0	0	0	0	0	0	0	0	0	0	0	1	1	1	1	1	1	1	1	1	1	1
1	5	0	98.51	707	7.17694	7.17694
1	6	0	99.59	1175	11.7984	11.7984
1	7	0	100.27	3851	38.4063	38.4063
1	8	1	94.37	5545	58.7581	58.7581
1	9	1	94.98	5122	53.9271	53.9271
1	10	1	97.76	5082	51.9845	51.9845
1	11	1	97.92	5212	53.2271	53.2271
1	12	1	104.53	4960	47.4505	47.4505
1	13	1	105.05	5094	48.4912	48.4912
1	14	1	106.52	4907	46.0665	46.0665
1	15	1	106.21	5433	51.1534	51.1534
1	16	1	102.29	5946	58.1288	58.1288
1	17	1	92.56	6695	72.3315	72.3315
1	18	1	94.62	6643	70.2071	70.2071
1	19	1	93.45	6490	69.4489	69.4489
1	20	0	85.75	6786	79.137	79.137
1	21	0	80.84	5943	73.5156	73.5156
1	22	0	82.68	6362	76.9473	76.9473
1	23	0	86.04	5575	64.7954	64.7954
1	24	0	92.58	4031	43.5407	43.5407
2	1	0	94.08	3259	34.6407	34.6407
2	2	0	96.28	1905	19.786	19.786
2	3	0	98.88	978	9.89078	9.89078
2	4	0	98.58	582	5.90383	5.90383
2	5	0	98.79	721	7.29831	7.29831
2	6	0	97.57	1229	12.5961	12.5961
2	7	0	100.13	4121	41.1565	41.1565
2	8	1	93.97	5309	56.4968	56.4968
2	9	1	93.72	5203	55.5164	55.5164
2	10	1	97.14	5241	53.9531	53.9531
2	11	1	97.66	5189	53.1333	53.1333
2	12	1	104.93	5286	50.3764	50.3764
2	13	1	105.63	4941	46.7765	46.7765
2	14	1	106.68	4862	45.5756	45.5756
2	15	1	105.59	5542	52.486	52.486
2	16	1	100.48	6361	63.3061	63.3061
2	17	1	95.51	6955	72.8196	72.8196
2	18	1	93.39	6704	71.785	71.785
2	19	1	92.14	6782	73.6054	73.6054
2	20	0	88.76	6516	73.4114	73.4114
2	21	0	80.11	6088	75.9955	75.9955
2	22	0	82.39	6265	76.0408	76.0408
2	23	0	85.44	5692	66.6199	66.6199
2	24	0	91.31	4396	48.1437	48.1437
3	1	0	93.61	3429	36.6307	36.6307
3	2	0	96.64	2129	22.0302	22.0302
3	3	0	98.43	1080	10.9723	10.9723
3	4	0	98.86	644	6.51426	6.51426
3	5	0	99.09	805	8.12393	8.12393
3	6	0	98.22	1558	15.8623	15.8623
3	7	0	98.21	4402	44.8223	44.8223
3	8	1	95.14	5441	57.1894	57.1894
3	9	1	91.9	5391	58.6616	58.6616
3	10	1	95.99	5445	56.7247	56.7247
3	11	1	96.22	5503	57.1919	57.1919
3	12	1	102.23	5436	53.1742	53.1742
3	13	1	103.44	5431	52.5039	52.5039
3	14	1	103.19	5491	53.2125	53.2125
3	15	1	99.65	6435	64.576	64.576
3	16	1	93.51	6767	72.3666	72.3666
3	17	1	88.53	7339	82.8985	82.8985
3	18	1	93.45	6386	68.336	68.336
3	19	1	93.82	6303	67.1818	67.1818
3	20	0	87.45	6432	73.5506	73.5506
3	21	0	78.29	5761	73.5854	73.5854
3	22	0	80.46	6259	77.7902	77.7902
3	23	0	82.66	5988	72.4413	72.4413
3	24	0	85.18	5264	61.7985	61.7985
4	1	0	90.61	4323	47.71	47.71
4	2	0	94.65	2655	28.0507	28.0507
4	3	0	97	1413	14.567	14.567
4	4	0	97.19	882	9.07501	9.07501
4	5	0	97.71	1311	13.4173	13.4173
4	6	0	97.08	2072	21.3432	21.3432
4	7	0	98.18	4288	43.6749	43.6749
4	8	1	100.29	4676	46.6248	46.6248
4	9	1	93.94	5017	53.4064	53.4064
4	10	1	96.94	5428	55.9934	55.9934
4	11	1	95.95	5755	59.9792	59.9792
4	12	1	99.23	5894	59.3974	59.3974
4	13	1	100.45	6258	62.2997	62.2997
4	14	1	97.98	6752	68.912	68.912
4	15	1	97.46	6822	69.9979	69.9979
4	16	1	96.21	6969	72.4353	72.4353
4	17	1	96.61	6317	65.3866	65.3866
4	18	1	94.67	5828	61.5612	61.5612
4	19	1	94.15	6026	64.0042	64.0042
4	20	0	88.74	5846	65.8778	65.8778
4	21	0	82.32	5417	65.8042	65.8042
4	22	0	83.45	5585	66.9263	66.9263
4	23	0	84.7	5564	65.6907	65.6907
4	24	0	80.89	5635	69.6625	69.6625
5	1	0	83.65	5524	66.0371	66.0371
5	2	0	90.12	4106	45.5615	45.5615
5	3	0	95.52	2091	21.8907	21.8907
5	4	0	97.8	1150	11.7587	11.7587
5	5	0	97.91	1109	11.3267	11.3267
5	6	0	96.93	1534	15.8259	15.8259
5	7	0	102.55	2852	27.8108	27.8108
5	8	1	102.73	3512	34.1867	34.1867
5	9	1	97.55	3920	40.1845	40.1845
5	10	1	99.47	4605	46.2954	46.2954
5	11	1	95.41	5542	58.0862	58.0862
5	12	1	99.4	6067	61.0362	61.0362
5	13	1	97.67	6275	64.247	64.247
5	14	1	102.91	5455	53.0075	53.0075
5	15	1	106.73	4909	45.9946	45.9946
5	16	1	105.98	4954	46.7447	46.7447
5	17	1	101.44	5622	55.4219	55.4219
5	18	1	99.22	5531	55.7448	55.7448
5	19	1	96.5	5750	59.5855	59.5855
5	20	0	90.58	5637	62.2323	62.2323
5	21	0	83.2	5079	61.0457	61.0457
5	22	0	87.65	4815	54.9344	54.9344
5	23	0	87.47	4922	56.2707	56.2707
5	24	0	82.2	5668	68.9538	68.9538
6	1	0	85.04	5319	62.547	62.547
6	2	0	92.56	3276	35.3933	35.3933
6	3	0	97.33	1359	13.9628	13.9628
6	4	0	98.02	784	7.99837	7.99837
6	5	0	97.55	831	8.51871	8.51871
6	6	0	98.13	1401	14.277	14.277
6	7	0	99.29	3574	35.9956	35.9956
6	8	1	95.77	4914	51.3104	51.3104
6	9	1	94.2	4867	51.6667	51.6667
6	10	1	95.48	5314	55.6556	55.6556
6	11	1	97.74	5084	52.0156	52.0156
6	12	1	101.67	4922	48.4115	48.4115
6	13	1	106	4786	45.1509	45.1509
6	14	1	73.15	3184	43.527	43.527
6	15	1	106.22	4988	46.9591	46.9591
6	16	1	103.87	5632	54.2216	54.2216
6	17	1	95.89	6770	70.6017	70.6017
6	18	1	95.7	6686	69.8642	69.8642
6	19	1	96.5	6654	68.9534	68.9534
6	20	0	91.48	6378	69.7202	69.7202
6	21	0	82.11	5833	71.0389	71.0389
6	22	0	82.67	6166	74.5857	74.5857
6	23	0	88.91	4695	52.8062	52.8062
6	24	0	92	3883	42.2065	42.2065
7	1	0	94.23	2929	31.0835	31.0835
7	2	0	97.3	1717	17.6465	17.6465
7	3	0	97.68	877	8.9783	8.9783
7	4	0	97.57	621	6.36466	6.36466
7	5	0	99.61	700	7.02741	7.02741
7	6	0	97.54	1276	13.0818	13.0818
7	7	0	100.46	3525	35.0886	35.0886
7	8	1	96.26	5123	53.2204	53.2204
7	9	1	90.63	5179	57.1444	57.1444
7	10	1	94.93	5428	57.179	57.179
7	11	1	97.48	5104	52.3595	52.3595
7	12	1	100.55	4336	43.1228	43.1228
7	13	1	96.56	5388	55.7995	55.7995
7	14	1	105.75	4842	45.7872	45.7872
7	15	1	104.51	5320	50.9042	50.9042
7	16	1	102.2	5968	58.3953	58.3953
7	17	1	96.9	6820	70.3818	70.3818
7	18	1	93.73	6825	72.8155	72.8155
7	19	1	90.55	6086	67.2115	67.2115
7	20	0	87.38	6716	76.8597	76.8597
7	21	0	79.26	6176	77.9208	77.9208
7	22	0	81.98	6083	74.201	74.201
7	23	0	88.18	5061	57.394	57.394
7	24	0	91.44	4069	44.4991	44.4991
8	1	0	94.94	3075	32.3889	32.3889
8	2	0	96.62	1856	19.2093	19.2093
8	3	0	97.88	937	9.57295	9.57295
8	4	0	98.44	586	5.95286	5.95286
8	5	0	98.73	731	7.40403	7.40403
8	6	0	97.44	1298	13.321	13.321
8	7	0	99.1	3546	35.782	35.782
8	8	1	95.01	5279	55.5626	55.5626
8	9	1	90.67	5321	58.6853	58.6853
8	10	1	94.97	5395	56.8074	56.8074
8	11	1	95.48	5468	57.2685	57.2685
8	12	1	100.49	5163	51.3782	51.3782
8	13	1	101.68	5004	49.2132	49.2132
8	14	1	104.16	4767	45.7661	45.7661
8	15	1	103.9	5336	51.3571	51.3571
8	16	1	102.21	5954	58.2526	58.2526
8	17	1	95.19	6817	71.6147	71.6147
8	18	1	92.94	6674	71.8098	71.8098
8	19	1	93.98	6533	69.5148	69.5148
8	20	0	91.55	6244	68.2032	68.2032
8	21	0	100.12	6030	60.2277	60.2277
8	22	0	83.51	6725	80.5293	80.5293
8	23	0	86.9	5256	60.4833	60.4833
8	24	0	91.41	4052	44.3278	44.3278
9	1	0	93.55	3363	35.9487	35.9487
9	2	0	95.84	1961	20.4612	20.4612
9	3	0	96.65	1048	10.8432	10.8432
9	4	0	97.04	629	6.48186	6.48186
9	5	0	97.83	755	7.71747	7.71747
9	6	0	97.03	1410	14.5316	14.5316
9	7	0	99.02	3628	36.6391	36.6391
9	8	1	95.03	5272	55.4772	55.4772
9	9	1	89.54	5401	60.3194	60.3194
9	10	1	93.21	5787	62.0856	62.0856
9	11	1	97	5308	54.7216	54.7216
9	12	1	102.47	5275	51.4785	51.4785
9	13	1	104.99	5109	48.6618	48.6618
9	14	1	105.98	5043	47.5844	47.5844
9	15	1	104.16	5365	51.5073	51.5073
9	16	1	99.1	6260	63.1685	63.1685
9	17	1	93.23	7018	75.2762	75.2762
9	18	1	92.72	6933	74.7735	74.7735
9	19	1	92	6681	72.6196	72.6196
9	20	0	91.02	6243	68.5893	68.5893
9	21	0	79.96	6206	77.6138	77.6138
9	22	0	82.73	6091	73.625	73.625
9	23	0	86.83	5349	61.6031	61.6031
9	24	0	90.71	4489	49.4874	49.4874
10	1	0	94	3568	37.9574	37.9574
10	2	0	96.31	2112	21.9292	21.9292
10	3	0	98.2	1086	11.0591	11.0591
10	4	0	98.2	711	7.24033	7.24033
10	5	0	97.67	904	9.25566	9.25566
10	6	0	96.92	1550	15.9926	15.9926
10	7	0	96.25	3966	41.2052	41.2052
10	8	1	90.54	5648	62.3813	62.3813
10	9	1	88.95	5281	59.3704	59.3704
10	10	1	93.44	5637	60.3275	60.3275
10	11	1	95.97	5549	57.8202	57.8202
10	12	1	101.5	5401	53.2118	53.2118
10	13	1	102.49	5273	51.4489	51.4489
10	14	1	104.49	5451	52.1677	52.1677
10	15	1	99.43	6185	62.2046	62.2046
10	16	1	96.45	6679	69.2483	69.2483
10	17	1	92.97	7174	77.1647	77.1647
10	18	1	94.18	6352	67.4453	67.4453
10	19	1	94.72	6269	66.1845	66.1845
10	20	0	91.53	5896	64.416	64.416
10	21	0	77.35	6206	80.2327	80.2327
10	22	0	82.19	6278	76.384	76.384
10	23	0	84.7	5728	67.6269	67.6269
10	24	0	86.4	5129	59.3634	59.3634
11	1	0	90.95	4339	47.7075	47.7075
11	2	0	94.42	2625	27.8013	27.8013
11	3	0	96.86	1424	14.7016	14.7016
11	4	0	97.27	952	9.78719	9.78719
11	5	0	98.22	1322	13.4596	13.4596
11	6	0	96.41	1984	20.5788	20.5788
11	7	0	97.3	3859	39.6608	39.6608
11	8	1	95.1	5162	54.2797	54.2797
11	9	1	92.9	5281	56.8461	56.8461
11	10	1	90.23	5409	59.9468	59.9468
11	11	1	96	5501	57.3021	57.3021
11	12	1	101.25	5511	54.4296	54.4296
11	13	1	99.47	5969	60.008	60.008
11	14	1	98.65	6449	65.3725	65.3725
11	15	1	98.94	6658	67.2933	67.2933
11	16	1	97.67	6503	66.5813	66.5813
11	17	1	99.97	6189	61.9086	61.9086
11	18	1	99.2	5640	56.8548	56.8548
11	19	1	101.51	5223	51.4531	51.4531
11	20	0	102.71	3778	36.7832	36.7832
11	21	0	90.13	3823	42.4165	42.4165
11	22	0	83.88	5378	64.1154	64.1154
11	23	0	84.86	5367	63.2453	63.2453
11	24	0	88.42	4488	50.7577	50.7577
12	1	0	76.46	5799	75.8436	75.8436
12	2	0	91.77	3798	41.3861	41.3861
12	3	0	94.93	2076	21.8687	21.8687
12	4	0	98.12	1123	11.4452	11.4452
12	5	0	99	1024	10.3434	10.3434
12	6	0	97.38	1393	14.3048	14.3048
12	7	0	99.45	2663	26.7773	26.7773
12	8	1	97.99	3708	37.8406	37.8406
12	9	1	89.55	3991	44.5673	44.5673
12	10	1	96.83	4478	46.246	46.246
12	11	1	94.96	5559	58.5404	58.5404
12	12	1	96.95	6272	64.6931	64.6931
12	13	1	98.93	6041	61.0634	61.0634
12	14	1	103.85	5408	52.0751	52.0751
12	15	1	105.22	4928	46.8352	46.8352
12	16	1	105.44	4862	46.1115	46.1115
12	17	1	102.07	5455	53.4437	53.4437
12	18	1	101.23	5535	54.6775	54.6775
12	19	1	98.22	5402	54.999	54.999
12	20	0	94.41	5354	56.7101	56.7101
12	21	0	84.74	5128	60.5145	60.5145
12	22	0	88.66	4563	51.4663	51.4663
12	23	0	87.98	4667	53.0461	53.0461
12	24	0	84.73	5263	62.115	62.115
13	1	0	86.27	4971	57.6214	57.6214
13	2	0	93.41	2842	30.425	30.425
13	3	0	96.72	1358	14.0405	14.0405
13	4	0	96.5	804	8.33161	8.33161
13	5	0	97.93	835	8.5265	8.5265
13	6	0	97.47	1310	13.44	13.44
13	7	0	97.11	3968	40.8609	40.8609
13	8	1	90.49	5748	63.5208	63.5208
13	9	1	87.96	5224	59.3906	59.3906
13	10	1	95.96	5255	54.7624	54.7624
13	11	1	99.17	5129	51.7193	51.7193
13	12	1	103.95	4983	47.9365	47.9365
13	13	1	106.72	4666	43.7219	43.7219
13	14	1	106.97	4717	44.0965	44.0965
13	15	1	105.46	5267	49.9431	49.9431
13	16	1	102.2	5798	56.7319	56.7319
13	17	1	96.17	8210	85.3697	85.3697
13	18	1	94.73	6402	67.5815	67.5815
13	19	1	88.63	8481	95.6899	95.6899
13	20	0	89.27	7668	85.8967	85.8967
13	21	0	79.14	7784	98.3573	98.3573
13	22	0	82.96	6094	73.4571	73.4571
13	23	0	90.41	4797	53.0583	53.0583
13	24	0	91.7	4118	44.9073	44.9073
14	1	0	94.7	3161	33.3791	33.3791
14	2	0	95.9	1989	20.7404	20.7404
14	3	0	98.36	1025	10.4209	10.4209
14	4	0	98.51	582	5.90803	5.90803
14	5	0	97.83	725	7.41081	7.41081
14	6	0	98.38	1256	12.7668	12.7668
14	7	0	95.99	4076	42.4628	42.4628
14	8	1	89.89	5855	65.1352	65.1352
14	9	1	88.01	5413	61.5044	61.5044
14	10	1	94.49	5442	57.5934	57.5934
14	11	1	97.48	5330	54.6779	54.6779
14	12	1	102.89	5095	49.5189	49.5189
14	13	1	105.46	5071	48.0846	48.0846
14	14	1	106.68	5023	47.0847	47.0847
14	15	1	104.12	5592	53.7073	53.7073
14	16	1	102.45	6114	59.6779	59.6779
14	17	1	95.67	6885	71.9661	71.9661
14	18	1	92.7	6673	71.9849	71.9849
14	19	1	95.2	6479	68.0567	68.0567
14	20	0	87.8	6177	70.3531	70.3531
14	21	0	75.85	6541	86.236	86.236
14	22	0	82.93	6185	74.581	74.581
14	23	0	87.29	5318	60.9234	60.9234
14	24	0	90.94	4314	47.4379	47.4379
15	1	0	93.55	3264	34.8904	34.8904
15	2	0	98	1918	19.5714	19.5714
15	3	0	98.22	1007	10.2525	10.2525
15	4	0	96.92	651	6.71688	6.71688
15	5	0	96.9	746	7.69866	7.69866
15	6	0	97.55	1304	13.3675	13.3675
15	7	0	96.74	4084	42.2162	42.2162
15	8	1	89.98	5640	62.6806	62.6806
15	9	1	85.5	5184	60.6316	60.6316
15	10	1	93.25	5553	59.5496	59.5496
15	11	1	94.99	5698	59.9853	59.9853
15	12	1	102.25	5323	52.0587	52.0587
15	13	1	103.96	5085	48.913	48.913
15	14	1	104.71	5259	50.2244	50.2244
15	15	1	103.93	5510	53.0165	53.0165
15	16	1	99.39	6221	62.5918	62.5918
15	17	1	94.71	6822	72.0304	72.0304
15	18	1	92	6439	69.9891	69.9891
15	19	1	91.47	6427	70.2635	70.2635
15	20	0	89.24	5870	65.7777	65.7777
15	21	0	82.98	5711	68.8238	68.8238
15	22	0	75.74	6789	89.6356	89.6356
15	23	0	84.42	5815	68.8818	68.8818
15	24	0	89.19	4564	51.1717	51.1717
16	1	0	92.66	3437	37.0926	37.0926
16	2	0	94.7	2097	22.1436	22.1436
16	3	0	97.45	1057	10.8466	10.8466
16	4	0	99.23	647	6.52021	6.52021
16	5	0	97.95	780	7.96325	7.96325
16	6	0	97.78	1322	13.5201	13.5201
16	7	0	98.15	4189	42.6796	42.6796
16	8	1	97.76	4846	49.5704	49.5704
16	9	1	87.33	5141	58.8687	58.8687
16	10	1	94.73	5515	58.2181	58.2181
16	11	1	96.93	5452	56.2468	56.2468
16	12	1	101.6	5454	53.6811	53.6811
16	13	1	104.72	5123	48.9209	48.9209
16	14	1	105	5225	49.7619	49.7619
16	15	1	102.74	5801	56.4629	56.4629
16	16	1	98.47	6731	68.3558	68.3558
16	17	1	93.96	6986	74.3508	74.3508
16	18	1	93.72	6370	67.9684	67.9684
16	19	1	90	6508	72.3111	72.3111
16	20	0	89.04	6018	67.5876	67.5876
16	21	0	80.17	6175	77.0238	77.0238
16	22	0	82.74	6148	74.3051	74.3051
16	23	0	87.51	5170	59.079	59.079
16	24	0	89.96	4335	48.1881	48.1881
17	1	0	92.31	3550	38.4574	38.4574
17	2	0	95.4	2232	23.3962	23.3962
17	3	0	97.68	1146	11.7322	11.7322
17	4	0	97.94	752	7.67817	7.67817
17	5	0	99.65	944	9.47316	9.47316
17	6	0	97.05	1673	17.2385	17.2385
17	7	0	92.33	4600	49.8213	49.8213
17	8	1	87.75	5643	64.3077	64.3077
17	9	1	84.75	5336	62.9617	62.9617
17	10	1	94.25	5512	58.4828	58.4828
17	11	1	95.71	5680	59.3459	59.3459
17	12	1	100.48	5528	55.0159	55.0159
17	13	1	102.98	5608	54.4572	54.4572
17	14	1	101.73	5543	54.4874	54.4874
17	15	1	99.59	6350	63.7614	63.7614
17	16	1	95.99	6821	71.0595	71.0595
17	17	1	92.44	7045	76.2116	76.2116
17	18	1	93.17	6260	67.189	67.189
17	19	1	93.22	6293	67.507	67.507
17	20	0	89.66	5815	64.8561	64.8561
17	21	0	79.97	5954	74.4529	74.4529
17	22	0	79.94	6088	76.1571	76.1571
17	23	0	84.15	5508	65.4545	65.4545
17	24	0	85.19	5032	59.068	59.068
18	1	0	89.88	3996	44.4593	44.4593
18	2	0	93.6	2718	29.0385	29.0385
18	3	0	97.15	1478	15.2136	15.2136
18	4	0	97.51	1052	10.7886	10.7886
18	5	0	98.83	1547	15.6531	15.6531
18	6	0	96.04	2362	24.5939	24.5939
18	7	0	93.65	4542	48.4997	48.4997
18	8	1	89.21	5930	66.4724	66.4724
18	9	1	85.84	5339	62.1971	62.1971
18	10	1	94.74	5386	56.8503	56.8503
18	11	1	95.72	5827	60.8755	60.8755
18	12	1	99.01	5909	59.6808	59.6808
18	13	1	98.66	6225	63.0955	63.0955
18	14	1	97	6595	67.9897	67.9897
18	15	1	94.48	6799	71.9623	71.9623
18	16	1	93.22	6911	74.1365	74.1365
18	17	1	98	6290	64.1837	64.1837
18	18	1	99.18	5520	55.6564	55.6564
18	19	1	98.2	5744	58.4929	58.4929
18	20	0	94.73	5109	53.9322	53.9322
18	21	0	84.23	5222	61.9969	61.9969
18	22	0	85.74	5344	62.328	62.328
18	23	0	84.18	5530	65.6926	65.6926
18	24	0	85.47	5454	63.8119	63.8119
19	1	0	86.96	5027	57.8082	57.8082
19	2	0	91.14	3575	39.2254	39.2254
19	3	0	96.07	1892	19.694	19.694
19	4	0	95.75	1257	13.1279	13.1279
19	5	0	97.58	1340	13.7323	13.7323
19	6	0	95.89	1748	18.2292	18.2292
19	7	0	97.32	3245	33.3436	33.3436
19	8	1	92.53	3713	40.1275	40.1275
19	9	1	93.31	3849	41.2496	41.2496
19	10	1	98.45	4585	46.5719	46.5719
19	11	1	96.48	5589	57.9291	57.9291
19	12	1	97.46	5993	61.4919	61.4919
19	13	1	96.33	6319	65.5974	65.5974
19	14	1	103.41	5399	52.2097	52.2097
19	15	1	106.98	4961	46.3732	46.3732
19	16	1	104.97	5153	49.0902	49.0902
19	17	1	102.37	5422	52.9647	52.9647
19	18	1	100.72	5405	53.6636	53.6636
19	19	1	98.41	5591	56.8133	56.8133
19	20	0	93.25	5129	55.0027	55.0027
19	21	0	84.2	5073	60.2494	60.2494
19	22	0	88.44	4577	51.7526	51.7526
19	23	0	88.47	4798	54.2331	54.2331
19	24	0	86.96	5291	60.8441	60.8441
20	1	0	89	4760	53.4831	53.4831
20	2	0	95.41	2674	28.0264	28.0264
20	3	0	97.57	1304	13.3648	13.3648
20	4	0	98.75	797	8.07089	8.07089
20	5	0	98.27	924	9.40267	9.40267
20	6	0	98.01	1361	13.8863	13.8863
20	7	0	93.53	4094	43.7721	43.7721
20	8	1	88.57	5974	67.4495	67.4495
20	9	1	85.67	5153	60.1494	60.1494
20	10	1	95.22	5390	56.6058	56.6058
20	11	1	96.74	5460	56.4399	56.4399
20	12	1	102.75	5306	51.6399	51.6399
20	13	1	105.74	5049	47.7492	47.7492
20	14	1	105.97	4906	46.2961	46.2961
20	15	1	104.69	5516	52.6889	52.6889
20	16	1	100.4	5998	59.741	59.741
20	17	1	94.48	6788	71.8459	71.8459
20	18	1	86.87	6828	78.6002	78.6002
20	19	1	90.5	6709	74.1326	74.1326
20	20	0	88.48	6054	68.4222	68.4222
20	21	0	82.06	5773	70.351	70.351
20	22	0	83.06	5771	69.4799	69.4799
20	23	0	90.96	4580	50.3518	50.3518
20	24	0	89.36	4275	47.8402	47.8402
21	1	0	92.04	3274	35.5715	35.5715
21	2	0	94.53	2063	21.8238	21.8238
21	3	0	97.51	1149	11.7834	11.7834
21	4	0	97.75	713	7.29412	7.29412
21	5	0	97.74	919	9.4025	9.4025
21	6	0	97.27	1478	15.1948	15.1948
21	7	0	95.04	4069	42.8136	42.8136
21	8	1	88.82	5444	61.2925	61.2925
21	9	1	87.07	4952	56.8738	56.8738
21	10	1	95.73	5241	54.7477	54.7477
21	11	1	96.98	5516	56.8777	56.8777
21	12	1	102.96	5400	52.4476	52.4476
21	13	1	105.22	5396	51.283	51.283
21	14	1	103.25	5779	55.9709	55.9709
21	15	1	101.23	6204	61.2862	61.2862
21	16	1	94.99	6873	72.355	72.355
21	17	1	92.47	6920	74.8351	74.8351
21	18	1	90.29	5607	62.0999	62.0999
21	19	1	89.86	6581	73.2361	73.2361
21	20	0	91.1	5301	58.1888	58.1888
21	21	0	76.11	6396	84.0363	84.0363
21	22	0	77.89	6516	83.6564	83.6564
21	23	0	81.6	5814	71.25	71.25
21	24	0	83.11	5258	63.2656	63.2656
22	1	0	88.65	4642	52.3632	52.3632
22	2	0	94.41	3303	34.9857	34.9857
22	3	0	97.67	1867	19.1154	19.1154
22	4	0	98.46	1235	12.5432	12.5432
22	5	0	97.94	1455	14.856	14.856
22	6	0	96.75	1909	19.7313	19.7313
22	7	0	97.08	3277	33.7557	33.7557
22	8	1	92.74	3578	38.581	38.581
22	9	1	95.39	3561	37.331	37.331
22	10	1	101.94	4112	40.3375	40.3375
22	11	1	98.98	5112	51.6468	51.6468
22	12	1	100.8	5877	58.3036	58.3036
22	13	1	103.73	5659	54.5551	54.5551
22	14	1	106.67	4872	45.6736	45.6736
22	15	1	108.73	4581	42.1319	42.1319
22	16	1	106.71	4696	44.0071	44.0071
22	17	1	103.43	5174	50.0242	50.0242
22	18	1	101.51	5221	51.4334	51.4334
22	19	1	98.92	5484	55.4387	55.4387
22	20	0	92.98	5018	53.9686	53.9686
22	21	0	85.39	4931	57.7468	57.7468
22	22	0	89.74	4354	48.5179	48.5179
22	23	0	88.19	4643	52.6477	52.6477
22	24	0	81.39	5678	69.7629	69.7629
23	1	0	86.42	4965	57.452	57.452
23	2	0	93.56	2933	31.3489	31.3489
23	3	0	95.91	1211	12.6264	12.6264
23	4	0	98.95	700	7.07428	7.07428
23	5	0	98.19	888	9.04369	9.04369
23	6	0	97.59	1414	14.4892	14.4892
23	7	0	92.69	4147	44.7405	44.7405
23	8	1	84.08	5794	68.9106	68.9106
23	9	1	85.02	5038	59.2566	59.2566
23	10	1	95.67	5250	54.8761	54.8761
23	11	1	97.75	5333	54.5575	54.5575
23	12	1	103.76	4989	48.0821	48.0821
23	13	1	106.46	4961	46.5997	46.5997
23	14	1	106.22	4945	46.5543	46.5543
23	15	1	104.72	5491	52.4351	52.4351
23	16	1	101.44	5910	58.261	58.261
23	17	1	95.11	6847	71.9903	71.9903
23	18	1	95.21	6493	68.1966	68.1966
23	19	1	79.59	6401	80.4247	80.4247
23	20	0	82.7	5839	70.6046	70.6046
23	21	0	78.98	6426	81.3624	81.3624
23	22	0	83.65	5955	71.1895	71.1895
23	23	0	89.72	4759	53.0428	53.0428
23	24	0	88.96	4258	47.8642	47.8642
24	1	0	93.85	3272	34.8641	34.8641
24	2	0	95.57	2200	23.0198	23.0198
24	3	0	96.57	1123	11.6289	11.6289
24	4	0	97.99	723	7.3783	7.3783
24	5	0	98.02	985	10.049	10.049
24	6	0	97.19	1475	15.1765	15.1765
24	7	0	94.09	4204	44.6806	44.6806
24	8	1	86.91	5527	63.5945	63.5945
24	9	1	85.83	5019	58.4761	58.4761
24	10	1	96.97	5240	54.0373	54.0373
24	11	1	97.49	5304	54.4056	54.4056
24	12	1	102.55	5327	51.9454	51.9454
24	13	1	105.5	5326	50.4834	50.4834
24	14	1	104.47	5292	50.6557	50.6557
24	15	1	102.14	6025	58.9877	58.9877
24	16	1	99.4	6476	65.1509	65.1509
24	17	1	91.44	6888	75.3281	75.3281
24	18	1	94.37	8014	84.9211	84.9211
24	19	1	93.48	6292	67.3085	67.3085
24	20	0	89.5	5680	63.4637	63.4637
24	21	0	80.49	6144	76.3325	76.3325
24	22	0	82.24	6138	74.6352	74.6352
24	23	0	87.49	5274	60.2812	60.2812
24	24	0	86.39	4823	55.8282	55.8282
25	1	0	90.95	3990	43.8703	43.8703
25	2	0	94.1	2614	27.779	27.779
25	3	0	96	1420	14.7917	14.7917
25	4	0	98.74	957	9.69212	9.69212
25	5	0	97.5	1184	12.1436	12.1436
25	6	0	98.26	1768	17.9931	17.9931
25	7	0	95.7	3928	41.0449	41.0449
25	8	1	94.61	4446	46.9929	46.9929
25	9	1	87.91	4593	52.2466	52.2466
25	10	1	98	5186	52.9184	52.9184
25	11	1	98.49	5384	54.6654	54.6654
25	12	1	102.01	5558	54.4849	54.4849
25	13	1	102.91	5985	58.1576	58.1576
25	14	1	98.46	6390	64.8995	64.8995
25	15	1	99.22	6599	66.5088	66.5088
25	16	1	97.97	6597	67.3369	67.3369
25	17	1	98.26	6042	61.4899	61.4899
25	18	1	97.98	5930	60.5226	60.5226
25	19	1	98.21	5730	58.3444	58.3444
25	20	0	90.83	5238	57.6682	57.6682
25	21	0	84.41	5380	63.7365	63.7365
25	22	0	86.93	4905	56.4247	56.4247
25	23	0	87.45	4970	56.8325	56.8325
25	24	0	82.97	5446	65.6382	65.6382
26	1	0	86.96	5080	58.4177	58.4177
26	2	0	92.14	3747	40.6664	40.6664
26	3	0	95.97	1948	20.298	20.298
26	4	0	97.12	1070	11.0173	11.0173
26	5	0	97.97	1090	11.1259	11.1259
26	6	0	97.73	1263	12.9234	12.9234
26	7	0	99.97	2389	23.8972	23.8972
26	8	1	94.46	2902	30.722	30.722
26	9	1	93.8	3438	36.6525	36.6525
26	10	1	100.43	4138	41.2028	41.2028
26	11	1	98.47	5154	52.3408	52.3408
26	12	1	101	5648	55.9208	55.9208
26	13	1	102.27	5520	53.9748	53.9748
26	14	1	105.71	4899	46.3438	46.3438
26	15	1	107.96	4558	42.2193	42.2193
26	16	1	105.47	4900	46.4587	46.4587
26	17	1	102.93	5157	50.102	50.102
26	18	1	104.23	4777	45.8313	45.8313
26	19	1	102.23	5032	49.2223	49.2223
26	20	0	94	4303	45.7766	45.7766
26	21	0	84.5	4731	55.9882	55.9882
26	22	0	89.97	4116	45.7486	45.7486
26	23	0	90.2	4356	48.2927	48.2927
26	24	0	85.36	5143	60.2507	60.2507
27	1	0	90.84	4270	47.0057	47.0057
27	2	0	95.67	2628	27.4694	27.4694
27	3	0	98.17	1218	12.407	12.407
27	4	0	98.71	731	7.40553	7.40553
27	5	0	99.32	788	7.93395	7.93395
27	6	0	98	1270	12.9592	12.9592
27	7	0	93.56	3862	41.2783	41.2783
27	8	1	86.75	5917	68.2075	68.2075
27	9	1	82.12	5145	62.6522	62.6522
27	10	1	96.99	5209	53.7066	53.7066
27	11	1	96.93	5185	53.4922	53.4922
27	12	1	104.2	5054	48.5029	48.5029
27	13	1	105.44	4975	47.1832	47.1832
27	14	1	106.21	5032	47.3778	47.3778
27	15	1	105.94	5336	50.3681	50.3681
27	16	1	103.66	5902	56.9361	56.9361
27	17	1	94.6	6796	71.8393	71.8393
27	18	1	94.45	6866	72.6945	72.6945
27	19	1	94.98	6211	65.3927	65.3927
27	20	0	88.99	5388	60.5461	60.5461
27	21	0	74.99	6500	86.6782	86.6782
27	22	0	83.94	5731	68.275	68.275
27	23	0	91.23	4500	49.3259	49.3259
27	24	0	90.46	4069	44.9812	44.9812
28	1	0	93.54	3127	33.4295	33.4295
28	2	0	95.48	1847	19.3444	19.3444
28	3	0	97.4	1001	10.2772	10.2772
28	4	0	95.97	635	6.61665	6.61665
28	5	0	97.28	729	7.49383	7.49383
28	6	0	98.19	1233	12.5573	12.5573
28	7	0	94.53	3740	39.5642	39.5642
28	8	1	89.38	4968	55.5829	55.5829
28	9	1	87.86	4462	50.7853	50.7853
28	10	1	96.24	5235	54.3953	54.3953
28	11	1	97.97	5204	53.1183	53.1183
28	12	1	104.13	5075	48.7372	48.7372
28	13	1	106.47	5113	48.0229	48.0229
28	14	1	104.24	5203	49.9137	49.9137
28	15	1	104.38	5663	54.2537	54.2537
28	16	1	101.97	6044	59.2723	59.2723
28	17	1	92	6710	72.9348	72.9348
28	18	1	93.73	6410	68.3879	68.3879
28	19	1	91.42	6465	70.7176	70.7176
28	20	0	86.28	5883	68.185	68.185
28	21	0	77.3	6489	83.9457	83.9457
28	22	0	81	6356	78.4691	78.4691
28	23	0	81.47	5986	73.4749	73.4749
28	24	0	84.73	5440	64.2039	64.2039
			94.7992	4571.54	48.8634
[truncated: 630 more columns]

## Sheet: Sheet5
	traffic	traffic prediction	پیش بینی
1	2906	3632.61	2706
2	1759	2036.27	1559
3	904	1151.28	704
4	542	719.312	342
5	707	681.759	507
6	1175	1465.94	975
7	3851	3756.15	3651
8	5545	5264.66	5345
9	5122	5264.39	4922
10	5082	5263.89	4882
11	5212	5263.1	5012
12	4960	5262.6	4760
13	5094	5268.12	4894
14	4907	5317.18	4707
15	5433	5572.06	5233
16	5946	6121.67	5746
17	6695	6399.18	6495
18	6643	6328.86	6443
19	6490	6033.94	6290
20	6786	5976.9	6586
21	5943	5786.2	5743
22	6362	5572.65	6162
23	5575	5334.43	5375
24	4031	5069.84	3831
25	3259	3653.72	3059
26	1905	2048.04	1705
27	978	1156.95	778
28	582	721.243	382
29	721	680.378	521
30	1229	1458.8	1029
31	4121	3745.43	3921
32	5309	5264.63	5109
33	5203	5264.38	5003
34	5241	5263.89	5041
35	5189	5263.11	4989
36	5286	5262.63	5086
37	4941	5268.24	4741
38	4862	5317.66	4662
39	5542	5573.7	5342
40	6361	6123.83	6161
41	6955	6400.79	6755
42	6704	6331.23	6504
43	6782	6038.5	6582
44	6516	5966.55	6316
45	6088	5774.53	5888
46	6265	5559.57	6065
47	5692	5319.83	5492
48	4396	5053.63	4196
49	3429	3675.21	3229
50	2129	2060.19	1929
51	1080	1163	880
52	644	723.551	444
53	805	679.409	605
54	1558	1452.13	1358
55	4402	3735.18	4202
56	5441	5264.58	5241
57	5391	5264.37	5191
58	5445	5263.89	5245
59	5503	5263.12	5303
60	5436	5262.67	5236
61	5431	5268.36	5231
62	5491	5318.14	5291
63	6435	5575.34	6235
64	6767	6125.99	6567
65	7339	6402.39	7139
66	6386	6333.57	6186
67	6303	6043.04	6103
68	6432	5957.72	6232
69	5761	5764.53	5561
70	6259	5548.29	6059
71	5988	5307.18	5788
72	5264	5039.53	5064
73	4323	3697.27	4123
74	2655	2072.92	2455
75	1413	1169.65	1213
76	882	726.504	682
77	1311	679.146	1111
78	2072	1446.24	1872
79	4288	3725.75	4088
80	4676	5264.51	4476
81	5017	5264.34	4817
82	5428	5263.89	5228
83	5755	5263.13	5555
84	5894	5262.71	5694
85	6258	5268.48	6058
86	6752	5318.62	6552
87	6822	5576.98	6622
88	6969	6128.15	6769
89	6317	6403.99	6117
90	5828	6335.91	5628
91	6026	6047.54	5826
92	5846	5951.32	5646
93	5417	5757.13	5217
94	5585	5539.79	5385
95	5564	5297.49	5364
96	5635	5028.57	5435
97	5524	3720.25	5324
98	4106	2086.62	3906
99	2091	1177.32	1891
100	1150	730.546	950
101	1109	680.068	909
102	1534	1441.66	1334
103	2852	3717.69	2652
104	3512	5264.41	3312
105	3920	5264.31	3720
106	4605	5263.88	4405
107	5542	5263.14	5342
108	6067	5262.74	5867
109	6275	5268.6	6075
110	5455	5319.1	5255
111	4909	5578.62	4709
112	4954	6130.29	4754
113	5622	6405.57	5422
114	5531	6338.22	5331
115	5750	6052.01	5550
116	5637	5948.39	5437
117	5079	5753.35	4879
118	4815	5535.05	4615
119	4922	5291.69	4722
120	5668	5021.6	5468
121	5319	3744.7	5119
122	3276	2101.88	3076
123	1359	1186.64	1159
124	784	736.361	584
125	831	682.91	631
126	1401	1439.18	1201
127	3574	3711.84	3374
128	4914	5264.26	4714
129	4867	5264.27	4667
130	5314	5263.87	5114
131	5084	5263.15	4884
132	4922	5262.78	4722
133	4786	5268.72	4586
134	3184	5319.58	2984
135	4988	5580.26	4788
136	5632	6132.43	5432
137	6770	6407.14	6570
138	6686	6340.52	6486
139	6654	6056.44	6454
140	6378	5949.59	6178
141	5833	5753.71	5633
142	6166	5534.42	5966
143	4695	5289.91	4495
144	3883	5018.51	3683
145	2929	3771.42	2729
146	1717	2119.55	1517
147	877	1198.51	677
148	621	744.891	421
149	700	688.649	500
150	1276	1439.79	1076
151	3525	3709.23	3325
152	5123	5264.03	4923
153	5179	5264.2	4979
154	5428	5263.85	5228
155	5104	5263.16	4904
156	4336	5262.81	4136
157	5388	5268.84	5188
158	4842	5320.07	4642
159	5320	5581.91	5120
160	5968	6134.56	5768
161	6820	6408.7	6620
162	6825	6342.8	6625
163	6086	6060.85	5886
164	6716	5954.37	6516
165	6176	5757.37	5976
166	6083	5536.75	5883
167	5061	5290.7	4861
168	4069	5017.56	3869

## Sheet: Sheet4
1	95.6	2906	30.3975	0		95.6	97.05	97.15	98.79	98.51	99.59	100.27	94.37	80.84	82.68	86.04	92.58	94.08	96.28	98.88	98.58	98.79	97.57	100.13	93.97	80.11	82.39	85.44	91.31	93.61	96.64	98.43	98.86	99.09	98.22	98.21	95.14	78.29	80.46	82.66	85.18	90.61	94.65	97	97.19	97.71	97.08	98.18	100.29
2	97.05	1759	18.1247	0		30.3975	18.1247	9.3052	5.48639	7.17694	11.7984	38.4063	58.7581	73.5156	76.9473	64.7954	43.5407	34.6407	19.786	9.89078	5.90383	7.29831	12.5961	41.1565	56.4967	75.9955	76.0408	66.6198	48.1437	36.6307	22.0302	10.9723	6.51426	8.12393	15.8623	44.8223	57.1894	73.5854	77.7902	72.4413	61.7985	47.71	28.0507	14.567	9.07501	13.4173	21.3432	43.6749	46.6248
3	97.15	904	9.3052	0
4	98.79	542	5.48639	0
5	98.51	707	7.17694	0
6	99.59	1175	11.7984	0
7	100.27	3851	38.4063	0
8	94.37	5545	58.7581	0
21	80.84	5943	73.5156	0
22	82.68	6362	76.9473	0
23	86.04	5575	64.7954	0
24	92.58	4031	43.5407	0
1	94.08	3259	34.6407	0
2	96.28	1905	19.786	0
3	98.88	978	9.89078	0
4	98.58	582	5.90383	0
5	98.79	721	7.29831	0
6	97.57	1229	12.5961	0
7	100.13	4121	41.1565	0
8	93.97	5309	56.4967	0
21	80.11	6088	75.9955	0
22	82.39	6265	76.0408	0
23	85.44	5692	66.6198	0
24	91.31	4396	48.1437	0
1	93.61	3429	36.6307	0
2	96.64	2129	22.0302	0
3	98.43	1080	10.9723	0
4	98.86	644	6.51426	0
5	99.09	805	8.12393	0
6	98.22	1558	15.8623	0
7	98.21	4402	44.8223	0
8	95.14	5441	57.1894	0
21	78.29	5761	73.5854	0
22	80.46	6259	77.7902	0
23	82.66	5988	72.4413	0
24	85.18	5264	61.7985	0
1	90.61	4323	47.71	0
2	94.65	2655	28.0507	0
3	97	1413	14.567	0
4	97.19	882	9.07501	0
5	97.71	1311	13.4173	0
6	97.08	2072	21.3432	0
7	98.18	4288	43.6749	0
8	100.29	4676	46.6248	0
21	82.32	5417	65.8042	0
22	83.45	5585	66.9263	0
23	84.7	5564	65.6907	0
24	80.89	5635	69.6625	0
1	83.65	5524	66.0371	0
2	90.12	4106	45.5615	0
3	95.52	2091	21.8907	0
4	97.8	1150	11.7587	0
5	97.91	1109	11.3267	0
6	96.93	1534	15.8259	0
7	102.55	2852	27.8108	0
8	102.73	3512	34.1867	0
21	83.2	5079	61.0457	0
22	87.65	4815	54.9344	0
23	87.47	4922	56.2707	0
24	82.2	5668	68.9538	0
1	85.04	5319	62.547	0
2	92.56	3276	35.3933	0
3	97.33	1359	13.9628	0
4	98.02	784	7.99837	0
5	97.55	831	8.51871	0
6	98.13	1401	14.277	0
7	99.29	3574	35.9956	0
8	95.77	4914	51.3104	0
21	82.11	5833	71.0388	0
22	82.67	6166	74.5857	0
23	88.91	4695	52.8062	0
24	92	3883	42.2065	0
1	94.23	2929	31.0835	0
2	97.3	1717	17.6465	0
3	97.68	877	8.9783	0
4	97.57	621	6.36466	0
5	99.61	700	7.02741	0
6	97.54	1276	13.0818	0
7	100.46	3525	35.0886	0
8	96.26	5123	53.2204	0
21	79.26	6176	77.9208	0
22	81.98	6083	74.201	0
23	88.18	5061	57.394	0
24	91.44	4069	44.4991	0
1	94.94	3075	32.3889	0
2	96.62	1856	19.2093	0
3	97.88	937	9.57295	0
4	98.44	586	5.95286	0
5	98.73	731	7.40403	0
6	97.44	1298	13.321	0
7	99.1	3546	35.782	0
8	95.01	5279	55.5626	0
21	100.12	6030	60.2277	0
22	83.51	6725	80.5293	0
23	86.9	5256	60.4833	0
24	91.41	4052	44.3278	0
1	93.55	3363	35.9487	0
2	95.84	1961	20.4612	0
3	96.65	1048	10.8432	0
4	97.04	629	6.48186	0
5	97.83	755	7.71747	0
6	97.03	1410	14.5316	0
7	99.02	3628	36.6391	0
8	95.03	5272	55.4772	0
21	79.96	6206	77.6138	0
22	82.73	6091	73.6251	0
23	86.83	5349	61.6031	0
24	90.71	4489	49.4874	0
1	94	3568	37.9575	0
2	96.31	2112	21.9292	0
3	98.2	1086	11.0591	0
4	98.2	711	7.24033	0
5	97.67	904	9.25566	0
6	96.92	1550	15.9926	0
7	96.25	3966	41.2052	0
8	90.54	5648	62.3813	0
21	77.35	6206	80.2327	0
22	82.19	6278	76.384	0
23	84.7	5728	67.6269	0
24	86.4	5129	59.3634	0
1	90.95	4339	47.7075	0
2	94.42	2625	27.8013	0
3	96.86	1424	14.7016	0
4	97.27	952	9.78719	0
5	98.22	1322	13.4596	0
6	96.41	1984	20.5788	0
7	97.3	3859	39.6608	0
8	95.1	5162	54.2797	0
21	90.13	3823	42.4165	0
22	83.88	5378	64.1154	0
23	84.86	5367	63.2454	0
24	88.42	4488	50.7578	0
1	76.46	5799	75.8436	0
2	91.77	3798	41.3861	0
3	94.93	2076	21.8687	0
4	98.12	1123	11.4452	0
5	99	1024	10.3434	0
6	97.38	1393	14.3048	0
7	99.45	2663	26.7773	0
8	97.99	3708	37.8406	0
21	84.74	5128	60.5145	0
22	88.66	4563	51.4663	0
23	87.98	4667	53.0461	0
24	84.73	5263	62.115	0
1	86.27	4971	57.6214	0
2	93.41	2842	30.425	0
3	96.72	1358	14.0405	0
4	96.5	804	8.33161	0
5	97.93	835	8.5265	0
6	97.47	1310	13.44	0
7	97.11	3968	40.8609	0
8	90.49	5748	63.5208	0
21	79.14	7784	98.3573	0
22	82.96	6094	73.4571	0
23	90.41	4797	53.0583	0
24	91.7	4118	44.9073	0
1	94.7	3161	33.3791	0
2	95.9	1989	20.7403	0
3	98.36	1025	10.4209	0
4	98.51	582	5.90803	0
5	97.83	725	7.41081	0
6	98.38	1256	12.7668	0
7	95.99	4076	42.4628	0
8	89.89	5855	65.1352	0
21	75.85	6541	86.236	0
22	82.93	6185	74.581	0
23	87.29	5318	60.9234	0
24	90.94	4314	47.4379	0
1	93.55	3264	34.8904	0
2	98	1918	19.5714	0
3	98.22	1007	10.2525	0
4	96.92	651	6.71688	0
5	96.9	746	7.69866	0
6	97.55	1304	13.3675	0
7	96.74	4084	42.2163	0
8	89.98	5640	62.6806	0
21	82.98	5711	68.8238	0
22	75.74	6789	89.6356	0
23	84.42	5815	68.8818	0
24	89.19	4564	51.1717	0
1	92.66	3437	37.0926	0
2	94.7	2097	22.1436	0
3	97.45	1057	10.8466	0
4	99.23	647	6.52021	0
5	97.95	780	7.96325	0
6	97.78	1322	13.5201	0
7	98.15	4189	42.6796	0
8	97.76	4846	49.5704	0
21	80.17	6175	77.0238	0
22	82.74	6148	74.305	0
23	87.51	5170	59.079	0
24	89.96	4335	48.1881	0
1	92.31	3550	38.4574	0
2	95.4	2232	23.3962	0
3	97.68	1146	11.7322	0
4	97.94	752	7.67817	0
5	99.65	944	9.47316	0
6	97.05	1673	17.2385	0
7	92.33	4600	49.8213	0
8	87.75	5643	64.3077	0
21	79.97	5954	74.4529	0
22	79.94	6088	76.1571	0
23	84.15	5508	65.4545	0
24	85.19	5032	59.068	0
1	89.88	3996	44.4593	0
2	93.6	2718	29.0385	0
3	97.15	1478	15.2136	0
4	97.51	1052	10.7886	0
5	98.83	1547	15.6531	0
6	96.04	2362	24.5939	0
7	93.65	4542	48.4997	0
8	89.21	5930	66.4724	0
21	84.23	5222	61.9969	0
22	85.74	5344	62.328	0
23	84.18	5530	65.6926	0
24	85.47	5454	63.8119	0
1	86.96	5027	57.8082	0
2	91.14	3575	39.2254	0
3	96.07	1892	19.694	0
4	95.75	1257	13.1279	0
5	97.58	1340	13.7323	0
6	95.89	1748	18.2292	0
7	97.32	3245	33.3436	0
8	92.53	3713	40.1275	0
21	84.2	5073	60.2494	0
22	88.44	4577	51.7526	0
23	88.47	4798	54.2331	0
24	86.96	5291	60.8441	0
1	89	4760	53.4832	0
2	95.41	2674	28.0264	0
3	97.57	1304	13.3648	0
4	98.75	797	8.07089	0
5	98.27	924	9.40267	0
6	98.01	1361	13.8863	0
7	93.53	4094	43.7721	0
8	88.57	5974	67.4495	0
21	82.06	5773	70.351	0
22	83.06	5771	69.4799	0
23	90.96	4580	50.3518	0
24	89.36	4275	47.8402	0
1	92.04	3274	35.5715	0
2	94.53	2063	21.8238	0
3	97.51	1149	11.7834	0
4	97.75	713	7.29412	0
5	97.74	919	9.4025	0
6	97.27	1478	15.1948	0
7	95.04	4069	42.8135	0
8	88.82	5444	61.2925	0
21	76.11	6396	84.0363	0
22	77.89	6516	83.6564	0
23	81.6	5814	71.25	0
24	83.11	5258	63.2655	0
1	88.65	4642	52.3632	0
2	94.41	3303	34.9857	0
3	97.67	1867	19.1154	0
4	98.46	1235	12.5432	0
5	97.94	1455	14.856	0
6	96.75	1909	19.7313	0
7	97.08	3277	33.7557	0
8	92.74	3578	38.581	0
21	85.39	4931	57.7468	0
22	89.74	4354	48.5179	0
23	88.19	4643	52.6477	0
24	81.39	5678	69.7629	0
1	86.42	4965	57.452	0
2	93.56	2933	31.3489	0
3	95.91	1211	12.6264	0
4	98.95	700	7.07428	0
5	98.19	888	9.04369	0
6	97.59	1414	14.4892	0
7	92.69	4147	44.7405	0
8	84.08	5794	68.9106	0
21	78.98	6426	81.3624	0
22	83.65	5955	71.1895	0
23	89.72	4759	53.0428	0
24	88.96	4258	47.8642	0
1	93.85	3272	34.8641	0
2	95.57	2200	23.0198	0
3	96.57	1123	11.6289	0
4	97.99	723	7.3783	0
5	98.02	985	10.049	0
6	97.19	1475	15.1765	0
7	94.09	4204	44.6806	0
8	86.91	5527	63.5945	0
21	80.49	6144	76.3325	0
22	82.24	6138	74.6352	0
23	87.49	5274	60.2812	0
24	86.39	4823	55.8282	0
1	90.95	3990	43.8703	0
2	94.1	2614	27.779	0
3	96	1420	14.7917	0
4	98.74	957	9.69212	0
5	97.5	1184	12.1436	0
6	98.26	1768	17.9931	0
7	95.7	3928	41.0449	0
8	94.61	4446	46.9929	0
21	84.41	5380	63.7365	0
22	86.93	4905	56.4247	0
23	87.45	4970	56.8325	0
24	82.97	5446	65.6382	0
1	86.96	5080	58.4177	0
2	92.14	3747	40.6664	0
3	95.97	1948	20.298	0
4	97.12	1070	11.0173	0
5	97.97	1090	11.1258	0
6	97.73	1263	12.9234	0
7	99.97	2389	23.8972	0
8	94.46	2902	30.722	0
21	84.5	4731	55.9882	0
22	89.97	4116	45.7486	0
23	90.2	4356	48.2927	0
24	85.36	5143	60.2507	0
1	90.84	4270	47.0057	0
2	95.67	2628	27.4694	0
3	98.17	1218	12.407	0
4	98.71	731	7.40553	0
5	99.32	788	7.93395	0
6	98	1270	12.9592	0
7	93.56	3862	41.2783	0
8	86.75	5917	68.2075	0
21	74.99	6500	86.6782	0
22	83.94	5731	68.275	0
23	91.23	4500	49.3259	0
24	90.46	4069	44.9812	0
1	93.54	3127	33.4295	0
2	95.48	1847	19.3444	0
3	97.4	1001	10.2772	0
4	95.97	635	6.61665	0
5	97.28	729	7.49383	0
6	98.19	1233	12.5573	0
7	94.53	3740	39.5642	0
8	89.38	4968	55.5829	0
21	77.3	6489	83.9457	0
22	81	6356	78.4691	0
23	81.47	5986	73.4749	0
24	84.73	5440	64.2039	0
9	94.98	5122	53.9271	1
10	97.76	5082	51.9845	1
11	97.92	5212	53.2271	1
12	104.53	4960	47.4505	1
13	105.05	5094	48.4912	1
14	106.52	4907	46.0665	1
15	106.21	5433	51.1534	1
16	102.29	5946	58.1288	1
17	92.56	6695	72.3315	1
18	94.62	6643	70.2071	1
19	93.45	6490	69.4489	1
20	85.75	6786	79.137	1
9	93.72	5203	55.5164	1
10	97.14	5241	53.9531	1
11	97.66	5189	53.1333	1
12	104.93	5286	50.3764	1
13	105.63	4941	46.7765	1
14	106.68	4862	45.5755	1
15	105.59	5542	52.486	1
16	100.48	6361	63.3061	1
17	95.51	6955	72.8196	1
18	93.39	6704	71.785	1
19	92.14	6782	73.6054	1
20	88.76	6516	73.4115	1
9	91.9	5391	58.6616	1
10	95.99	5445	56.7247	1
11	96.22	5503	57.1919	1
12	102.23	5436	53.1742	1
13	103.44	5431	52.5039	1
14	103.19	5491	53.2125	1
15	99.65	6435	64.576	1
16	93.51	6767	72.3666	1
17	88.53	7339	82.8984	1
18	93.45	6386	68.336	1
19	93.82	6303	67.1818	1
20	87.45	6432	73.5506	1
9	93.94	5017	53.4064	1
10	96.94	5428	55.9934	1
11	95.95	5755	59.9792	1
12	99.23	5894	59.3974	1
13	100.45	6258	62.2996	1
14	97.98	6752	68.912	1
15	97.46	6822	69.998	1
16	96.21	6969	72.4353	1
17	96.61	6317	65.3866	1
18	94.67	5828	61.5612	1
19	94.15	6026	64.0042	1
20	88.74	5846	65.8778	1
9	97.55	3920	40.1845	1
10	99.47	4605	46.2954	1
11	95.41	5542	58.0862	1
12	99.4	6067	61.0362	1
13	97.67	6275	64.2469	1
14	102.91	5455	53.0075	1
15	106.73	4909	45.9946	1
16	105.98	4954	46.7447	1
17	101.44	5622	55.4219	1
18	99.22	5531	55.7448	1
19	96.5	5750	59.5855	1
20	90.58	5637	62.2323	1
9	94.2	4867	51.6667	1
10	95.48	5314	55.6556	1
11	97.74	5084	52.0155	1
12	101.67	4922	48.4115	1
13	106	4786	45.1509	1
14	73.15	3184	43.527	1
15	106.22	4988	46.9591	1
16	103.87	5632	54.2216	1
17	95.89	6770	70.6017	1
18	95.7	6686	69.8642	1
19	96.5	6654	68.9534	1
20	91.48	6378	69.7202	1
9	90.63	5179	57.1444	1
10	94.93	5428	57.179	1
11	97.48	5104	52.3595	1
12	100.55	4336	43.1228	1
13	96.56	5388	55.7995	1
14	105.75	4842	45.7872	1
15	104.51	5320	50.9042	1
16	102.2	5968	58.3953	1
17	96.9	6820	70.3818	1
18	93.73	6825	72.8155	1
19	90.55	6086	67.2115	1
20	87.38	6716	76.8597	1
9	90.67	5321	58.6853	1
10	94.97	5395	56.8074	1
11	95.48	5468	57.2685	1
12	100.49	5163	51.3783	1
13	101.68	5004	49.2132	1
14	104.16	4767	45.7661	1
15	103.9	5336	51.3571	1
16	102.21	5954	58.2526	1
17	95.19	6817	71.6147	1
18	92.94	6674	71.8098	1
19	93.98	6533	69.5148	1
20	91.55	6244	68.2032	1
9	89.54	5401	60.3194	1
10	93.21	5787	62.0856	1
11	97	5308	54.7216	1
12	102.47	5275	51.4785	1
13	104.99	5109	48.6618	1
14	105.98	5043	47.5844	1
15	104.16	5365	51.5073	1
16	99.1	6260	63.1685	1
17	93.23	7018	75.2762	1
18	92.72	6933	74.7735	1
19	92	6681	72.6196	1
20	91.02	6243	68.5893	1
9	88.95	5281	59.3704	1
10	93.44	5637	60.3275	1
11	95.97	5549	57.8201	1
12	101.5	5401	53.2118	1
13	102.49	5273	51.4489	1
14	104.49	5451	52.1677	1
15	99.43	6185	62.2046	1
16	96.45	6679	69.2483	1
17	92.97	7174	77.1647	1
18	94.18	6352	67.4453	1
19	94.72	6269	66.1845	1
20	91.53	5896	64.416	1
9	92.9	5281	56.8461	1
10	90.23	5409	59.9468	1
11	96	5501	57.3021	1
12	101.25	5511	54.4296	1
13	99.47	5969	60.008	1
14	98.65	6449	65.3725	1
15	98.94	6658	67.2933	1
16	97.67	6503	66.5814	1
17	99.97	6189	61.9086	1
18	99.2	5640	56.8548	1
19	101.51	5223	51.4531	1
20	102.71	3778	36.7832	1
9	89.55	3991	44.5673	1
10	96.83	4478	46.246	1
11	94.96	5559	58.5404	1
12	96.95	6272	64.6931	1
13	98.93	6041	61.0634	1
14	103.85	5408	52.0751	1
15	105.22	4928	46.8352	1
16	105.44	4862	46.1115	1
17	102.07	5455	53.4437	1
18	101.23	5535	54.6775	1
19	98.22	5402	54.999	1
20	94.41	5354	56.7101	1
9	87.96	5224	59.3906	1
10	95.96	5255	54.7624	1
11	99.17	5129	51.7193	1
12	103.95	4983	47.9365	1
13	106.72	4666	43.7219	1
14	106.97	4717	44.0965	1
15	105.46	5267	49.9431	1
16	102.2	5798	56.7319	1
17	96.17	8210	85.3697	1
18	94.73	6402	67.5815	1
19	88.63	8481	95.6899	1
20	89.27	7668	85.8967	1
9	88.01	5413	61.5044	1
10	94.49	5442	57.5934	1
11	97.48	5330	54.6779	1
12	102.89	5095	49.5189	1
13	105.46	5071	48.0846	1
14	106.68	5023	47.0847	1
15	104.12	5592	53.7073	1
16	102.45	6114	59.6779	1
17	95.67	6885	71.9661	1
18	92.7	6673	71.9849	1
19	95.2	6479	68.0567	1
20	87.8	6177	70.3531	1
9	85.5	5184	60.6316	1
10	93.25	5553	59.5496	1
11	94.99	5698	59.9853	1
12	102.25	5323	52.0587	1
13	103.96	5085	48.913	1
14	104.71	5259	50.2244	1
15	103.93	5510	53.0164	1
16	99.39	6221	62.5918	1
17	94.71	6822	72.0304	1
18	92	6439	69.9891	1
19	91.47	6427	70.2635	1
20	89.24	5870	65.7777	1
9	87.33	5141	58.8687	1
10	94.73	5515	58.2181	1
11	96.93	5452	56.2468	1
12	101.6	5454	53.6811	1
13	104.72	5123	48.9209	1
14	105	5225	49.7619	1
15	102.74	5801	56.4629	1
16	98.47	6731	68.3558	1
17	93.96	6986	74.3508	1
18	93.72	6370	67.9684	1
19	90	6508	72.3111	1
20	89.04	6018	67.5876	1
9	84.75	5336	62.9616	1
10	94.25	5512	58.4828	1
11	95.71	5680	59.3459	1
12	100.48	5528	55.0159	1
13	102.98	5608	54.4572	1
14	101.73	5543	54.4874	1
15	99.59	6350	63.7614	1
16	95.99	6821	71.0595	1
17	92.44	7045	76.2116	1
18	93.17	6260	67.189	1
19	93.22	6293	67.507	1
20	89.66	5815	64.8561	1
9	85.84	5339	62.1971	1
10	94.74	5386	56.8503	1
11	95.72	5827	60.8755	1
12	99.01	5909	59.6808	1
13	98.66	6225	63.0955	1
14	97	6595	67.9897	1
15	94.48	6799	71.9623	1
16	93.22	6911	74.1364	1
17	98	6290	64.1837	1
18	99.18	5520	55.6564	1
19	98.2	5744	58.4929	1
20	94.73	5109	53.9322	1
9	93.31	3849	41.2496	1
10	98.45	4585	46.5719	1
11	96.48	5589	57.9291	1
12	97.46	5993	61.4919	1
13	96.33	6319	65.5974	1
14	103.41	5399	52.2097	1
15	106.98	4961	46.3732	1
16	104.97	5153	49.0902	1
17	102.37	5422	52.9647	1
18	100.72	5405	53.6636	1
19	98.41	5591	56.8133	1
20	93.25	5129	55.0027	1
9	85.67	5153	60.1494	1
10	95.22	5390	56.6058	1
11	96.74	5460	56.4399	1
12	102.75	5306	51.6399	1
13	105.74	5049	47.7492	1
14	105.97	4906	46.2961	1
15	104.69	5516	52.6889	1
16	100.4	5998	59.741	1
17	94.48	6788	71.8459	1
18	86.87	6828	78.6002	1
19	90.5	6709	74.1326	1
20	88.48	6054	68.4222	1
9	87.07	4952	56.8738	1
10	95.73	5241	54.7477	1
11	96.98	5516	56.8777	1
12	102.96	5400	52.4475	1
13	105.22	5396	51.283	1
14	103.25	5779	55.9709	1
15	101.23	6204	61.2862	1
16	94.99	6873	72.355	1
17	92.47	6920	74.8351	1
18	90.29	5607	62.0999	1
19	89.86	6581	73.2361	1
20	91.1	5301	58.1888	1
9	95.39	3561	37.331	1
10	101.94	4112	40.3374	1
11	98.98	5112	51.6468	1
12	100.8	5877	58.3036	1
13	103.73	5659	54.5551	1
14	106.67	4872	45.6736	1
15	108.73	4581	42.1319	1
16	106.71	4696	44.0071	1
17	103.43	5174	50.0242	1
18	101.51	5221	51.4334	1
19	98.92	5484	55.4387	1
20	92.98	5018	53.9686	1
9	85.02	5038	59.2567	1
10	95.67	5250	54.8761	1
11	97.75	5333	54.5575	1
12	103.76	4989	48.0821	1
13	106.46	4961	46.5997	1
14	106.22	4945	46.5543	1
15	104.72	5491	52.4351	1
16	101.44	5910	58.261	1
17	95.11	6847	71.9903	1
18	95.21	6493	68.1966	1
19	79.59	6401	80.4247	1
20	82.7	5839	70.6046	1
9	85.83	5019	58.4761	1
10	96.97	5240	54.0373	1
11	97.49	5304	54.4056	1
12	102.55	5327	51.9454	1
13	105.5	5326	50.4834	1
14	104.47	5292	50.6557	1
15	102.14	6025	58.9877	1
16	99.4	6476	65.1509	1
17	91.44	6888	75.3281	1
18	94.37	8014	84.9211	1
19	93.48	6292	67.3085	1
20	89.5	5680	63.4637	1
9	87.91	4593	52.2466	1
10	98	5186	52.9184	1
11	98.49	5384	54.6654	1
12	102.01	5558	54.4849	1
13	102.91	5985	58.1576	1
14	98.46	6390	64.8995	1
15	99.22	6599	66.5088	1
16	97.97	6597	67.3369	1
17	98.26	6042	61.4899	1
18	97.98	5930	60.5226	1
19	98.21	5730	58.3444	1
20	90.83	5238	57.6682	1
9	93.8	3438	36.6525	1
10	100.43	4138	41.2028	1
11	98.47	5154	52.3408	1
12	101	5648	55.9208	1
13	102.27	5520	53.9748	1
14	105.71	4899	46.3438	1
15	107.96	4558	42.2193	1
16	105.47	4900	46.4587	1
17	102.93	5157	50.102	1
18	104.23	4777	45.8313	1
19	102.23	5032	49.2223	1
20	94	4303	45.7766	1
9	82.12	5145	62.6522	1
10	96.99	5209	53.7066	1
11	96.93	5185	53.4922	1
12	104.2	5054	48.5029	1
13	105.44	4975	47.1832	1
14	106.21	5032	47.3778	1
15	105.94	5336	50.3681	1
16	103.66	5902	56.9361	1
17	94.6	6796	71.8393	1
18	94.45	6866	72.6946	1
19	94.98	6211	65.3927	1
20	88.99	5388	60.5461	1
9	87.86	4462	50.7853	1
10	96.24	5235	54.3953	1
11	97.97	5204	53.1183	1
12	104.13	5075	48.7372	1
13	106.47	5113	48.0229	1
14	104.24	5203	49.9137	1
15	104.38	5663	54.2537	1
16	101.97	6044	59.2723	1
17	92	6710	72.9348	1
18	93.73	6410	68.3879	1
19	91.42	6465	70.7176	1
20	86.28	5883	68.185	1
[truncated: 292 more columns]

## Sheet: Sheet2
	زمان شروع	سرعت متوسط	تعداد برگزیده	سرعت متوسط	چگالی	فاصله نقطه از مبدا			ف
8	1395/06/01 07:00:00	94.37	5545	94.37	58.7581	5545.8	5479.23	93.2506	5480.02	0
10	1395/06/01 09:00:00	97.76	5082	97.76	51.9845	5082.94	4997.76	96.1395	4998.68	0
11	1395/06/01 10:00:00	97.92	5212	97.92	53.2271	5212.92	5088.31	95.5962	5089.21	0
12	1395/06/01 11:00:00	104.53	4960	104.53	47.4505	4961.1	4658.46	98.1752	4659.5	0
13	1395/06/01 12:00:00	105.05	5094	105.05	48.4912	5095.08	4737.61	97.7004	4738.61	0
14	1395/06/01 13:00:00	106.52	4907	106.52	46.0665	4908.16	4552.01	98.8139	4553.08	0
15	1395/06/01 14:00:00	106.21	5433	106.21	51.1534	5434.04	4936.62	96.5063	4937.56	0
16	1395/06/01 15:00:00	102.29	5946	102.29	58.1288	5946.88	5435.72	93.5117	5436.53	0
17	1395/06/01 16:00:00	92.56	6695	92.56	72.3315	6695.64	6361.89	87.9547	6362.5	0
18	1395/06/01 17:00:00	94.62	6643	94.62	70.2071	6643.67	6230.42	88.7435	6231.06	0
19	1395/06/01 18:00:00	93.45	6490	93.45	69.4489	6490.67	6182.93	89.0284	6183.57	0
20	1395/06/01 19:00:00	85.75	6786	85.75	79.137	6786.54	6767.76	85.5195	6768.3	0
10	1395/06/02 09:00:00	97.14	5241	97.14	53.9531	5241.9	5140.73	95.2816	5141.62	0
11	1395/06/02 10:00:00	97.66	5189	97.66	53.1333	5189.92	5081.51	95.6369	5082.41	0
12	1395/06/02 11:15:00	104.93	5286	104.93	50.3764	5287.04	4879.05	96.8517	4880.01	0
13	1395/06/02 12:00:00	105.63	4941	105.63	46.7765	4942.13	4606.79	98.4852	4607.85	0
14	1395/06/02 13:00:00	106.68	4862	106.68	45.5756	4863.17	4513.92	99.0425	4515	0
15	1395/06/02 14:00:00	105.59	5542	105.59	52.486	5543.01	5034.43	95.9194	5035.34	0
16	1395/06/02 15:00:00	100.48	6361	100.48	63.3061	6361.79	5786.59	91.4065	5787.31	0
17	1395/06/02 16:00:00	95.51	6955	95.51	72.8196	6955.66	6391.77	87.7754	6392.37	0
18	1395/06/02 17:00:00	93.39	6704	93.39	71.785	6704.65	6328.29	88.1562	6328.91	0
19	1395/06/02 18:00:00	92.14	6782	92.14	73.6054	6782.63	6439.61	87.4883	6440.21	0
20	1395/06/02 19:00:00	88.76	6516	88.76	73.4114	6516.6	6427.83	87.559	6428.43	0
8	1395/06/03 07:00:00	95.14	5441	95.14	57.1894	5441.83	5370.32	93.9041	5371.14	0
10	1395/06/03 09:00:00	95.99	5445	95.99	56.7247	5445.85	5337.76	94.0994	5338.59	0				4585	98.45
11	1395/06/03 10:00:00	96.22	5503	96.22	57.1919	5503.84	5370.49	93.9031	5371.31	0				7784	79.14
12	1395/06/03 11:00:00	102.23	5436	102.23	53.1742	5436.96	5084.47	95.6192	5085.37	0				3199	-19.31
13	1395/06/03 12:00:00	103.44	5431	103.44	52.5039	5431.98	5035.73	95.9116	5036.64	0				-0.00603626	m
14	1395/06/03 13:00:00	103.19	5491	103.19	53.2125	5491.97	5087.25	95.6025	5088.15	0				126.126	b
15	1395/06/03 14:00:00	99.65	6435	99.65	64.576	6435.77	5870.25	90.9045	5870.95	0
16	1395/06/03 15:00:00	93.51	6767	93.51	72.3666	6767.65	6364.04	87.9417	6364.65	0
17	1395/06/03 16:00:00	88.53	7339	88.53	82.8985	7339.53	6982.58	84.2305	6983.09	0
18	1395/06/03 17:00:00	93.45	6386	93.45	68.336	6386.68	6112.66	89.45	6113.31	0
19	1395/06/03 18:00:00	93.82	6303	93.82	67.1818	6303.7	6039.08	89.8915	6039.75	0
8	1395/06/04 07:00:00	100.29	4676	100.29	46.6248	4677.08	4595.12	98.5553	4596.18	0
10	1395/06/04 09:00:00	96.94	5428	96.94	55.9934	5428.87	5286.25	94.4085	5287.09	0
11	1395/06/04 10:00:00	95.95	5755	95.95	59.9792	5755.8	5562.96	92.7482	5563.73	0
12	1395/06/04 11:00:00	99.23	5894	99.23	59.3974	5894.84	5523.18	92.9869	5523.96	0
13	1395/06/04 12:00:00	100.45	6258	100.45	62.2997	6258.81	5719.62	91.8083	5720.36	0
14	1395/06/04 13:00:00	97.98	6752	97.98	68.912	6752.71	6149.11	89.2313	6149.76	0
15	1395/06/04 14:00:00	97.46	6822	97.46	69.9979	6822.7	6217.35	88.8219	6217.98	0
16	1395/06/04 15:00:00	96.21	6969	96.21	72.4353	6969.66	6368.26	87.9165	6368.86	0
17	1395/06/04 16:00:00	96.61	6317	96.61	65.3866	6317.74	5923.17	90.587	5923.87	0
18	1395/06/04 17:00:00	94.67	5828	94.67	61.5612	5828.77	5670.11	92.1053	5670.86	0
19	1395/06/04 18:00:00	94.15	6026	94.15	64.0042	6026.74	5832.7	91.1298	5833.41	0
10	1395/06/05 09:00:00	99.47	4605	99.47	46.2954	4606.07	4569.71	98.7077	4570.78	0
11	1395/06/05 10:00:00	95.41	5542	95.41	58.0862	5542.82	5432.76	93.5294	5433.57	0
12	1395/06/05 11:00:00	99.4	6067	99.4	61.0362	6067.81	5634.72	92.3177	5635.48	0
13	1395/06/05 12:00:00	97.67	6275	97.67	64.247	6275.76	5848.66	91.034	5849.37	0
14	1395/06/05 13:00:00	102.91	5455	102.91	53.0075	5455.97	5072.38	95.6917	5073.28	0
15	1395/06/05 14:00:00	106.73	4909	106.73	45.9946	4910.16	4546.44	98.8474	4547.52	0
16	1395/06/05 15:00:00	105.98	4954	105.98	46.7447	4955.13	4604.35	98.4999	4605.4	0
17	1395/06/05 16:00:00	101.44	5622	101.44	55.4219	5622.92	5245.76	94.6514	5246.62	0
18	1395/06/05 17:00:00	99.22	5531	99.22	55.7448	5531.89	5268.67	94.514	5269.51	0
19	1395/06/05 18:00:00	96.5	5750	96.5	59.5855	5750.81	5536.06	92.9096	5536.84	0
10	1395/06/06 09:00:00	95.48	5314	95.48	55.6556	5314.86	5262.35	94.5519	5263.2	0
11	1395/06/06 10:00:00	97.74	5084	97.74	52.0156	5084.94	5000.04	96.1258	5000.96	0
12	1395/06/06 11:00:00	101.67	4922	101.67	48.4115	4923.05	4731.58	97.7365	4732.58	0
13	1395/06/06 12:00:00	106	4786	106	45.1509	4787.17	4480.83	99.241	4481.93	0
15	1395/06/06 14:00:00	106.22	4988	106.22	46.9591	4989.13	4620.83	98.401	4621.88	0
16	1395/06/06 15:00:00	103.87	5632	103.87	54.2216	5632.96	5160.04	95.1658	5160.92	0
17	1395/06/06 16:00:00	95.89	6770	95.89	70.6017	6770.68	6255.02	88.5959	6255.65	0
18	1395/06/06 17:00:00	95.7	6686	95.7	69.8642	6686.68	6208.98	88.8721	6209.61	0
19	1395/06/06 18:00:00	96.5	6654	96.5	68.9534	6654.7	6151.72	89.2157	6152.37	0
20	1395/06/06 19:00:00	91.48	6378	91.48	69.7202	6378.66	6199.95	88.9263	6200.59	0
8	1395/06/07 07:00:00	96.26	5123	96.26	53.2204	5123.9	5087.82	95.5991	5088.72	0
10	1395/06/07 09:00:00	94.93	5428	94.93	57.179	5428.83	5369.59	93.9085	5370.41	0
11	1395/06/07 10:00:00	97.48	5104	97.48	52.3595	5104.93	5025.19	95.9749	5026.11	0
12	1395/06/07 11:00:00	100.55	4336	100.55	43.1228	4337.17	4320.93	100.2	4322.09	0
13	1395/06/07 12:00:00	96.56	5388	96.56	55.7995	5388.87	5272.54	94.4908	5273.38	0
14	1395/06/07 13:00:00	105.75	4842	105.75	45.7872	4843.15	4530.36	98.9438	4531.44	0
15	1395/06/07 14:00:00	104.51	5320	104.51	50.9042	5321.03	4918.2	96.6168	4919.15	0
16	1395/06/07 15:00:00	102.2	5968	102.2	58.3953	5968.88	5454.18	93.4009	5454.98	0
17	1395/06/07 16:00:00	96.9	6820	96.9	70.3818	6820.69	6241.32	88.6781	6241.95	0
18	1395/06/07 17:00:00	93.73	6825	93.73	72.8155	6825.64	6391.52	87.7769	6392.12	0
19	1395/06/07 18:00:00	90.55	6086	90.55	67.2115	6086.67	6040.98	89.8801	6041.65	0
20	1395/06/07 19:00:00	87.38	6716	87.38	76.8597	6716.57	6634.47	86.3192	6635.03	0
8	1395/06/08 07:00:00	95.01	5279	95.01	55.5626	5279.85	5255.75	94.5915	5256.6	0
10	1395/06/08 09:00:00	94.97	5395	94.97	56.8074	5395.84	5343.57	94.0646	5344.39	0
11	1395/06/08 10:00:00	95.48	5468	95.48	57.2685	5468.83	5375.85	93.8709	5376.67	0
12	1395/06/08 11:00:00	100.49	5163	100.49	51.3782	5163.98	4953.21	96.4067	4954.15	0
13	1395/06/08 12:00:00	101.68	5004	101.68	49.2132	5005.03	4792.07	97.3736	4793.06	0
14	1395/06/08 13:00:00	104.16	4767	104.16	45.7661	4768.14	4528.73	98.9536	4529.81	0
15	1395/06/08 14:00:00	103.9	5336	103.9	51.3571	5337.01	4951.65	96.4161	4952.59	0
16	1395/06/08 15:00:00	102.21	5954	102.21	58.2526	5954.88	5444.3	93.4602	5445.1	0
17	1395/06/08 16:00:00	95.19	6817	95.19	71.6147	6817.66	6317.79	88.2192	6318.41	0
18	1395/06/08 17:00:00	92.94	6674	92.94	71.8098	6674.65	6329.82	88.1471	6330.43	0
19	1395/06/08 18:00:00	93.98	6533	93.98	69.5148	6533.68	6187.07	89.0036	6187.71	0
20	1395/06/08 19:00:00	91.55	6244	91.55	68.2032	6244.67	6104.23	89.5006	6104.88	0
21	1395/06/08 20:00:00	100.12	6030	100.12	60.2277	6030.83	5579.9	92.6466	5580.66	0
8	1395/06/09 07:00:00	95.03	5272	95.03	55.4772	5272.86	5249.69	94.6279	5250.54	0
10	1395/06/09 09:00:00	93.21	5787	93.21	62.0856	5787.75	5705.31	91.8942	5706.05	0
11	1395/06/09 10:00:00	97	5308	97	54.7216	5308.89	5195.86	94.9508	5196.73	0
12	1395/06/09 11:00:00	102.47	5275	102.47	51.4785	5276	4960.59	96.3624	4961.53	0
13	1395/06/09 12:00:00	104.99	5109	104.99	48.6618	5110.08	4750.51	97.623	4751.51	0
14	1395/06/09 13:00:00	105.98	5043	105.98	47.5844	5044.11	4668.69	98.1138	4669.72	0
15	1395/06/09 14:00:00	104.16	5365	104.16	51.5073	5366.01	4962.71	96.3497	4963.65	0
16	1395/06/09 15:00:00	99.1	6260	99.1	63.1685	6260.78	5777.47	91.4612	5778.19	0
17	1395/06/09 16:00:00	93.23	7018	93.23	75.2762	7018.62	6540.31	86.8841	6540.89	0
18	1395/06/09 17:00:00	92.72	6933	92.72	74.7735	6933.62	6510.16	87.065	6510.74	0
19	1395/06/09 18:00:00	92	6681	92	72.6196	6681.63	6379.54	87.8488	6380.14	0
20	1395/06/09 19:00:00	91.02	6243	91.02	68.5893	6243.66	6128.71	89.3537	6129.36	0
10	1395/06/10 09:00:00	93.44	5637	93.44	60.3275	5637.77	5586.68	92.6059	5587.45	0
11	1395/06/10 10:00:00	95.97	5549	95.97	57.8202	5549.83	5414.29	93.6402	5415.1	0
12	1395/06/10 11:00:00	101.5	5401	101.5	53.2118	5401.95	5087.2	95.6028	5088.1	0
13	1395/06/10 12:00:00	102.49	5273	102.49	51.4489	5274	4958.42	96.3755	4959.35	0
14	1395/06/10 13:00:00	104.49	5451	104.49	52.1677	5452	5011.17	96.059	5012.09	0
15	1395/06/10 14:00:00	99.43	6185	99.43	62.2046	6185.8	5713.27	91.8464	5714	0
16	1395/06/10 15:00:00	96.45	6679	96.45	69.2483	6679.7	6170.31	89.1041	6170.95	0
17	1395/06/10 16:00:00	92.97	7174	92.97	77.1647	7174.6	6652.46	86.2112	6653.02	0
18	1395/06/10 17:00:00	94.18	6352	94.18	67.4453	6352.7	6055.94	89.7904	6056.61	0
19	1395/06/10 18:00:00	94.72	6269	94.72	66.1845	6269.72	5974.91	90.2765	5975.59	0
20	1395/06/10 19:00:00	91.53	5896	91.53	64.416	5896.71	5859.76	90.9674	5860.47	0
11	1395/06/11 10:00:00	96	5501	96	57.3021	5501.84	5378.19	93.8568	5379.01	0
12	1395/06/11 11:00:00	101.25	5511	101.25	54.4296	5511.93	5174.96	95.0762	5175.84	0
13	1395/06/11 12:00:00	99.47	5969	99.47	60.008	5969.83	5564.93	92.7364	5565.7	0
14	1395/06/11 13:00:00	98.65	6449	98.65	65.3725	6449.75	5922.26	90.5925	5922.95	0
15	1395/06/11 14:00:00	98.94	6658	98.94	67.2933	6658.74	6046.22	89.8487	6046.88	0
16	1395/06/11 15:00:00	97.67	6503	97.67	66.5813	6503.73	6000.51	90.123	6001.18	0
17	1395/06/11 16:00:00	99.97	6189	99.97	61.9086	6189.81	5693.44	91.9653	5694.19	0
18	1395/06/11 17:00:00	99.2	5640	99.2	56.8548	5640.87	5346.89	94.0446	5347.72	0
19	1395/06/11 18:00:00	101.51	5223	101.51	51.4531	5223.99	4958.72	96.3737	4959.66	0
11	1395/06/12 10:00:00	94.96	5559	94.96	58.5404	5559.81	5464.21	93.3407	5465.01	0
12	1395/06/12 11:00:00	96.95	6272	96.95	64.6931	6272.75	5877.92	90.8585	5878.62	0
13	1395/06/12 12:00:00	98.93	6041	98.93	61.0634	6041.81	5636.56	92.3067	5637.31	0
14	1395/06/12 13:00:00	103.85	5408	103.85	52.0751	5409	5004.4	96.0996	5005.32	0
15	1395/06/12 14:00:00	105.22	4928	105.22	46.8352	4929.12	4611.31	98.4582	4612.36	0
16	1395/06/12 15:00:00	105.44	4862	105.44	46.1115	4863.14	4555.5	98.793	4556.57	0
17	1395/06/12 16:00:00	102.07	5455	102.07	53.4437	5455.95	5103.99	95.5021	5104.88	0
18	1395/06/12 17:00:00	101.23	5535	101.23	54.6775	5535.93	5192.71	94.9698	5193.57	0
19	1395/06/12 18:00:00	98.22	5402	98.22	54.999	5402.89	5215.66	94.832	5216.53	0
20	1395/06/12 19:00:00	94.41	5354	94.41	56.7101	5354.83	5336.74	94.1056	5337.57	0
10	1395/06/13 09:00:00	95.96	5255	95.96	54.7624	5255.88	5198.78	94.9333	5199.64	0
11	1395/06/13 10:00:00	99.17	5129	99.17	51.7193	5129.96	4978.3	96.2562	4979.23	0
12	1395/06/13 11:00:00	103.95	4983	103.95	47.9365	4984.08	4695.52	97.9529	4696.54	0
13	1395/06/13 12:00:00	106.72	4666	106.72	43.7219	4667.22	4368.48	99.9151	4369.62	0
14	1395/06/13 13:00:00	106.97	4717	106.97	44.0965	4718.21	4398.07	99.7376	4399.21	0
15	1395/06/13 14:00:00	105.46	5267	105.46	49.9431	5268.06	4846.75	97.0455	4847.72	0
16	1395/06/13 15:00:00	102.2	5798	102.2	56.7319	5798.9	5338.27	94.0964	5339.1	0
17	1395/06/13 16:00:00	96.17	8210	96.17	85.3697	8210.56	7120.23	83.4046	7120.71	0
18	1395/06/13 17:00:00	94.73	6402	94.73	67.5815	6402.7	6064.64	89.7381	6065.31	0
19	1395/06/13 18:00:00	88.63	8481	88.63	95.6899	8481.46	7667.04	80.1238	7667.46	0
20	1395/06/13 19:00:00	89.27	7668	89.27	85.8967	7668.52	7149.23	83.2306	7149.72	0
10	1395/06/14 09:00:00	94.49	5442	94.49	57.5934	5442.82	5398.51	93.7349	5399.33	0
11	1395/06/14 10:00:00	97.48	5330	97.48	54.6779	5330.89	5192.74	94.9696	5193.6	0
12	1395/06/14 11:00:00	102.89	5095	102.89	49.5189	5096.04	4815.02	97.2359	4816	0
13	1395/06/14 12:00:00	105.46	5071	105.46	48.0846	5072.1	4706.78	97.8853	4707.79	0
14	1395/06/14 13:00:00	106.68	5023	106.68	47.0847	5024.13	4630.46	98.3432	4631.51	0
15	1395/06/14 14:00:00	104.12	5592	104.12	53.7073	5592.97	5123.02	95.3879	5123.91	0
16	1395/06/14 15:00:00	102.45	6114	102.45	59.6779	6114.86	5542.39	92.8717	5543.16	0
17	1395/06/14 16:00:00	95.67	6885	95.67	71.9661	6885.66	6339.45	88.0893	6340.06	0
18	1395/06/14 17:00:00	92.7	6673	92.7	71.9849	6673.64	6340.6	88.0824	6341.21	0
19	1395/06/14 18:00:00	95.2	6479	95.2	68.0567	6479.7	6094.92	89.5565	6095.58	0
10	1395/06/15 09:00:00	93.25	5553	93.25	59.5496	5553.78	5533.61	92.9244	5534.39	0
11	1395/06/15 10:00:00	94.99	5698	94.99	59.9853	5698.79	5563.38	92.7457	5564.15	0
12	1395/06/15 11:00:00	102.25	5323	102.25	52.0587	5323.98	5003.19	96.1068	5004.12	0
13	1395/06/15 12:00:00	103.96	5085	103.96	48.913	5086.06	4769.47	97.5092	4770.47	0
14	1395/06/15 13:00:00	104.71	5259	104.71	50.2244	5260.04	4867.73	96.9196	4868.7	0
15	1395/06/15 14:00:00	103.93	5510	103.93	53.0165	5510.98	5073.03	95.6878	5073.93	0
16	1395/06/15 15:00:00	99.39	6221	99.39	62.5918	6221.79	5739.12	91.6913	5739.85	0
17	1395/06/15 16:00:00	94.71	6822	94.71	72.0304	6822.66	6343.4	88.0656	6344.01	0
18	1395/06/15 17:00:00	92	6439	92	69.9891	6439.66	6216.8	88.8252	6217.43	0
19	1395/06/15 18:00:00	91.47	6427	91.47	70.2635	6427.65	6233.94	88.7224	6234.57	0
8	1395/06/16 07:00:00	97.76	4846	97.76	49.5704	4846.99	4818.87	97.2128	4819.85	0
10	1395/06/16 09:00:00	94.73	5515	94.73	58.2181	5515.81	5441.91	93.4745	5442.71	0
11	1395/06/16 10:00:00	96.93	5452	96.93	56.2468	5452.86	5304.14	94.3012	5304.98	0
12	1395/06/16 11:00:00	101.6	5454	101.6	53.6811	5454.95	5121.13	95.3992	5122.02	0
13	1395/06/16 12:00:00	104.72	5123	104.72	48.9209	5124.07	4770.07	97.5056	4771.06	0
14	1395/06/16 13:00:00	105	5225	105	49.7619	5226.05	4833.21	97.1267	4834.19	0
15	1395/06/16 14:00:00	102.74	5801	102.74	56.4629	5801.91	5319.36	94.2098	5320.2	0
16	1395/06/16 15:00:00	98.47	6731	98.47	68.3558	6731.72	6113.92	89.4425	6114.57	0
17	1395/06/16 16:00:00	93.96	6986	93.96	74.3508	6986.63	6484.71	87.2177	6485.29	0
18	1395/06/16 17:00:00	93.72	6370	93.72	67.9684	6370.69	6089.3	89.5902	6089.96	0
19	1395/06/16 18:00:00	90	6508	90	72.3111	6508.62	6360.64	87.9622	6361.25	0
10	1395/06/17 09:00:00	94.25	5512	94.25	58.4828	5512.81	5460.22	93.3647	5461.02	0
11	1395/06/17 10:00:00	95.71	5680	95.71	59.3459	5680.81	5519.65	93.0081	5520.44	0
12	1395/06/17 11:00:00	100.48	5528	100.48	55.0159	5528.91	5216.87	94.8248	5217.73	0
13	1395/06/17 12:00:00	102.98	5608	102.98	54.4572	5608.95	5176.94	95.0644	5177.81	0
14	1395/06/17 13:00:00	101.73	5543	101.73	54.4874	5543.93	5179.1	95.0514	5179.97	0
15	1395/06/17 14:00:00	99.59	6350	99.59	63.7614	6350.78	5816.69	91.2259	5817.41	0
16	1395/06/17 15:00:00	95.99	6821	95.99	71.0595	6821.68	6283.45	88.4253	6284.08	0
17	1395/06/17 16:00:00	92.44	7045	92.44	76.2116	7045.61	6596.08	86.5495	6596.65	0
18	1395/06/17 17:00:00	93.17	6260	93.17	67.189	6260.69	6039.54	89.8888	6040.21	0
19	1395/06/17 18:00:00	93.22	6293	93.22	67.507	6293.69	6059.88	89.7667	6060.54	0
10	1395/06/18 09:00:00	94.74	5386	94.74	56.8503	5386.83	5346.58	94.0465	5347.4	0
11	1395/06/18 10:00:00	95.72	5827	95.72	60.8755	5827.79	5623.85	92.3829	5624.61	0
12	1395/06/18 11:00:00	99.01	5909	99.01	59.6808	5909.83	5542.59	92.8705	5543.37	0
13	1395/06/18 12:00:00	98.66	6225	98.66	63.0955	6225.78	5772.62	91.4903	5773.35	0
14	1395/06/18 13:00:00	97	6595	97	67.9897	6595.71	6090.66	89.5821	6091.32	0
15	1395/06/18 14:00:00	94.48	6799	94.48	71.9623	6799.66	6339.21	88.0907	6339.82	0
16	1395/06/18 15:00:00	93.22	6911	93.22	74.1365	6911.63	6471.77	87.2954	6472.36	0
17	1395/06/18 16:00:00	98	6290	98	64.1837	6290.76	5844.5	91.059	5845.21	0
18	1395/06/18 17:00:00	99.18	5520	99.18	55.6564	5520.89	5262.4	94.5516	5263.25	0
19	1395/06/18 18:00:00	98.2	5744	98.2	58.4929	5744.84	5460.92	93.3605	5461.72	0
11	1395/06/19 10:00:00	96.48	5589	96.48	57.9291	5589.83	5421.86	93.5948	5422.67	0
12	1395/06/19 11:00:00	97.46	5993	97.46	61.4919	5993.79	5665.45	92.1333	5666.2	0
13	1395/06/19 12:00:00	96.33	6319	96.33	65.5974	6319.73	5936.88	90.5047	5937.57	0
14	1395/06/19 13:00:00	103.41	5399	103.41	52.2097	5399.99	5014.24	96.0405	5015.16	0
15	1395/06/19 14:00:00	106.98	4961	106.98	46.3732	4962.15	4575.72	98.6717	4576.78	0
16	1395/06/19 15:00:00	104.97	5153	104.97	49.0902	5154.07	4782.82	97.4291	4783.81	0
17	1395/06/19 16:00:00	102.37	5422	102.37	52.9647	5422.97	5069.27	95.7104	5070.18	0
18	1395/06/19 17:00:00	100.72	5405	100.72	53.6636	5405.94	5119.87	95.4068	5120.76	0
19	1395/06/19 18:00:00	98.41	5591	98.41	56.8133	5591.87	5343.98	94.0621	5344.81	0
10	1395/06/20 09:00:00	95.22	5390	95.22	56.6058	5390.84	5329.41	94.1496	5330.24	0
11	1395/06/20 10:00:00	96.74	5460	96.74	56.4399	5460.86	5317.74	94.2195	5318.58	0
12	1395/06/20 11:00:00	102.75	5306	102.75	51.6399	5306.99	4972.47	96.2912	4973.4	0
13	1395/06/20 12:00:00	105.74	5049	105.74	47.7492	5050.11	4681.26	98.0385	4682.28	0
14	1395/06/20 13:00:00	105.97	4906	105.97	46.2961	4907.14	4569.77	98.7074	4570.84	0
15	1395/06/20 14:00:00	104.69	5516	104.69	52.6889	5516.99	5049.21	95.8307	5050.12	0
16	1395/06/20 15:00:00	100.4	5998	100.4	59.741	5998.84	5546.7	92.8458	5547.48	0
17	1395/06/20 16:00:00	94.48	6788	94.48	71.8459	6788.66	6332.05	88.1337	6332.66	0
18	1395/06/20 17:00:00	86.87	6828	86.87	78.6002	6828.55	6736.56	85.7066	6737.1	0
19	1395/06/20 18:00:00	90.5	6709	90.5	74.1326	6709.61	6471.54	87.2968	6472.13	0
10	1395/06/21 09:00:00	95.73	5241	95.73	54.7477	5241.87	5197.73	94.9396	5198.6	0
11	1395/06/21 10:00:00	96.98	5516	96.98	56.8777	5516.85	5348.5	94.035	5349.32	0
12	1395/06/21 11:00:00	102.96	5400	102.96	52.4476	5400.98	5031.62	95.9363	5032.54	0
13	1395/06/21 12:00:00	105.22	5396	105.22	51.283	5397.03	4946.19	96.4489	4947.13	0
14	1395/06/21 13:00:00	103.25	5779	103.25	55.9709	5779.92	5284.67	94.418	5285.51	0
15	1395/06/21 14:00:00	101.23	6204	101.23	61.2862	6204.83	5651.59	92.2164	5652.35	0
16	1395/06/21 15:00:00	94.99	6873	94.99	72.355	6873.66	6363.33	87.946	6363.94	0
17	1395/06/21 16:00:00	92.47	6920	92.47	74.8351	6920.62	6513.86	87.0428	6514.44	0
19	1395/06/21 18:00:00	89.86	6581	89.86	73.2361	6581.61	6417.17	87.623	6417.77	0
10	1395/06/22 09:00:00	101.94	4112	101.94	40.3375	4113.26	4096.22	101.549	4097.47	0
11	1395/06/22 10:00:00	98.98	5112	98.98	51.6468	5112.96	4972.97	96.2882	4973.91	0
12	1395/06/22 11:00:00	100.8	5877	100.8	58.3036	5877.86	5447.83	93.439	5448.63	0
13	1395/06/22 12:00:00	103.73	5659	103.73	54.5551	5659.95	5183.95	95.0223	5184.82	0
14	1395/06/22 13:00:00	106.67	4872	106.67	45.6736	4873.17	4521.54	98.9968	4522.62	0
15	1395/06/22 14:00:00	108.73	4581	108.73	42.1319	4582.29	4241.67	100.676	4242.86	0
16	1395/06/22 15:00:00	106.71	4696	106.71	44.0071	4697.21	4391.02	99.7799	4392.16	0
17	1395/06/22 16:00:00	103.43	5174	103.43	50.0242	5175.03	4852.8	97.0092	4853.77	0
18	1395/06/22 17:00:00	101.51	5221	101.51	51.4334	5221.99	4957.27	96.3824	4958.21	0
19	1395/06/22 18:00:00	98.92	5484	98.92	55.4387	5484.89	5246.96	94.6443	5247.81	0
10	1395/06/23 09:00:00	95.67	5250	95.67	54.8761	5250.87	5206.9	94.8846	5207.76	0
11	1395/06/23 10:00:00	97.75	5333	97.75	54.5575	5333.9	5184.13	95.0212	5185	0
12	1395/06/23 11:00:00	103.76	4989	103.76	48.0821	4990.08	4706.59	97.8865	4707.61	0
13	1395/06/23 12:00:00	106.46	4961	106.46	46.5997	4962.14	4593.18	98.5669	4594.24	0
14	1395/06/23 13:00:00	106.22	4945	106.22	46.5543	4946.14	4589.69	98.5879	4590.75	0
15	1395/06/23 14:00:00	104.72	5491	104.72	52.4351	5492	5030.71	95.9417	5031.63	0
16	1395/06/23 15:00:00	101.44	5910	101.44	58.261	5910.87	5444.88	93.4567	5445.69	0
17	1395/06/23 16:00:00	95.11	6847	95.11	71.9903	6847.66	6340.94	88.0804	6341.55	0
18	1395/06/23 17:00:00	95.21	6493	95.21	68.1966	6493.7	6103.81	89.5031	6104.47	0
10	1395/06/24 09:00:00	96.97	5240	96.97	54.0373	5240.9	5146.8	95.2452	5147.68	0
11	1395/06/24 10:00:00	97.49	5304	97.49	54.4056	5304.9	5173.24	95.0866	5174.11	0
12	1395/06/24 11:00:00	102.55	5327	102.55	51.9454	5327.99	4994.89	96.1566	4995.82	0
13	1395/06/24 12:00:00	105.5	5326	105.5	50.4834	5327.04	4887	96.804	4887.96	0
14	1395/06/24 13:00:00	104.47	5292	104.47	50.6557	5293.03	4899.79	96.7273	4900.74	0
15	1395/06/24 14:00:00	102.14	6025	102.14	58.9877	6025.87	5495.04	93.1558	5495.83	0
16	1395/06/24 15:00:00	99.4	6476	99.4	65.1509	6476.76	5907.82	90.6791	5908.52	0
17	1395/06/24 16:00:00	91.44	6888	91.44	75.3281	6888.61	6543.41	86.8655	6543.99	0
18	1395/06/24 17:00:00	94.37	8014	94.37	84.9211	8014.56	7095.44	83.5534	7095.93	0
19	1395/06/24 18:00:00	93.48	6292	93.48	67.3085	6292.69	6047.19	89.8429	6047.86	0
10	1395/06/25 09:00:00	98	5186	98	52.9184	5186.93	5065.91	95.7306	5066.81	0
11	1395/06/25 10:00:00	98.49	5384	98.49	54.6654	5384.9	5191.85	94.9749	5192.72	0
12	1395/06/25 11:00:00	102.01	5558	102.01	54.4849	5558.94	5178.92	95.0525	5179.79	0
13	1395/06/25 12:00:00	102.91	5985	102.91	58.1576	5985.88	5437.72	93.4997	5438.52	0
14	1395/06/25 13:00:00	98.46	6390	98.46	64.8995	6390.76	5891.41	90.7775	5892.11	0
15	1395/06/25 14:00:00	99.22	6599	99.22	66.5088	6599.75	5995.83	90.151	5996.51	0
16	1395/06/25 15:00:00	97.97	6597	97.97	67.3369	6597.73	6049.01	89.8319	6049.68	0
17	1395/06/25 16:00:00	98.26	6042	98.26	61.4899	6042.8	5665.32	92.1341	5666.07	0
18	1395/06/25 17:00:00	97.98	5930	97.98	60.5226	5930.81	5599.93	92.5264	5600.7	0
19	1395/06/25 18:00:00	98.21	5730	98.21	58.3444	5730.84	5450.65	93.4221	5451.45	0
11	1395/06/26 10:00:00	98.47	5154	98.47	52.3408	5154.94	5023.83	95.983	5024.75	0
12	1395/06/26 11:00:00	101	5648	101	55.9208	5648.9	5281.12	94.4393	5281.96	0
13	1395/06/26 12:00:00	102.27	5520	102.27	53.9748	5520.95	5142.3	95.2722	5143.18	0
14	1395/06/26 13:00:00	105.71	4899	105.71	46.3438	4900.14	4573.45	98.6853	4574.51	0
15	1395/06/26 14:00:00	107.96	4558	107.96	42.2193	4559.28	4248.69	100.634	4249.89	0
16	1395/06/26 15:00:00	105.47	4900	105.47	46.4587	4901.13	4582.32	98.6321	4583.38	0
17	1395/06/26 16:00:00	102.93	5157	102.93	50.102	5158.03	4858.61	96.9743	4859.58	0
18	1395/06/26 17:00:00	104.23	4777	104.23	45.8313	4778.14	4533.79	98.9233	4534.87	0
19	1395/06/26 18:00:00	102.23	5032	102.23	49.2223	5033.04	4792.75	97.3695	4793.74	0
10	1395/06/27 09:00:00	96.99	5209	96.99	53.7066	5209.9	5122.97	95.3882	5123.86	0
11	1395/06/27 10:00:00	96.93	5185	96.93	53.4922	5185.91	5107.49	95.481	5108.38	0
12	1395/06/27 11:00:00	104.2	5054	104.2	48.5029	5055.07	4738.49	97.6951	4739.5	0
13	1395/06/27 12:00:00	105.44	4975	105.44	47.1832	4976.12	4638.01	98.2979	4639.06	0
14	1395/06/27 13:00:00	106.21	5032	106.21	47.3778	5033.12	4652.91	98.2085	4653.94	0
15	1395/06/27 14:00:00	105.94	5336	105.94	50.3681	5337.05	4878.43	96.8554	4879.39	0
16	1395/06/27 15:00:00	103.66	5902	103.66	56.9361	5902.91	5352.59	94.0104	5353.42	0
17	1395/06/27 16:00:00	94.6	6796	94.6	71.8393	6796.66	6331.64	88.1362	6332.25	0
18	1395/06/27 17:00:00	94.45	6866	94.45	72.6945	6866.65	6384.13	87.8212	6384.73	0
19	1395/06/27 18:00:00	94.98	6211	94.98	65.3927	6211.73	5923.57	90.5846	5924.26	0
10	1395/06/28 09:00:00	96.24	5235	96.24	54.3953	5235.88	5172.5	95.091	5173.37	0
11	1395/06/28 10:00:00	97.97	5204	97.97	53.1183	5204.92	5080.42	95.6435	5081.32	0
12	1395/06/28 11:00:00	104.13	5075	104.13	48.7372	5076.07	4756.2	97.5888	4757.2	0
13	1395/06/28 12:00:00	106.47	5113	106.47	48.0229	5114.11	4702.09	97.9135	4703.11	0
14	1395/06/28 13:00:00	104.24	5203	104.24	49.9137	5204.04	4844.55	97.0587	4845.53	0
15	1395/06/28 14:00:00	104.38	5663	104.38	54.2537	5663.96	5162.34	95.1519	5163.22	0
16	1395/06/28 15:00:00	101.97	6044	101.97	59.2723	6044.86	5514.6	93.0384	5515.39	0
17	1395/06/28 16:00:00	92	6710	92	72.9348	6710.63	6398.8	87.7332	6399.4	0
18	1395/06/28 17:00:00	93.73	6410	93.73	68.3879	6410.69	6115.95	89.4303	6116.61	0
19	1395/06/28 18:00:00	91.42	6465	91.42	70.7176	6465.65	6262.23	88.5526	6262.85	0
1	1395/06/01 00:00:00	95.6	2906	95.6	30.3975	2907.57	3242.53	106.671	3244.28	1
2	1395/06/01 01:00:00	97.05	1759	97.05	18.1247	1761.68	2061.78	113.755	2064.91	1
3	1395/06/01 02:00:00	97.15	904	97.15	9.3052	909.205	1111.57	119.457	1117.97	1
4	1395/06/01 03:00:00	98.79	542	98.79	5.48639	550.93	669.923	122.106	680.96	1
5	1395/06/01 04:00:00	98.51	707	98.51	7.17694	713.83	867.828	120.919	876.212	1
6	1395/06/01 05:00:00	99.59	1175	99.59	11.7984	1179.21	1389.7	117.788	1394.69	1
7	1395/06/01 06:00:00	100.27	3851	100.27	38.4063	3852.31	3936.84	102.505	3938.17	1
9	1395/06/01 08:00:00	94.98	5122	94.98	53.9271	5122.88	5138.87	95.2928	5139.75	1
21	1395/06/01 20:00:00	80.84	5943	80.84	73.5156	5943.55	6434.16	87.521	6434.76	1
22	1395/06/01 21:00:00	82.68	6362	82.68	76.9473	6362.54	6639.64	86.2882	6640.2	1
23	1395/06/01 22:00:00	86.04	5575	86.04	64.7954	5575.66	5884.61	90.8183	5885.31	1
24	1395/06/01 23:00:00	92.58	4031	92.58	43.5407	4032.06	4354.13	100.001	4355.27	1
1	1395/06/02 00:00:00	94.08	3259	94.08	34.6407	3260.36	3617.27	104.422	3618.77	1
2	1395/06/02 01:00:00	96.28	1905	96.28	19.786	1907.43	2230.71	112.742	2233.56	1
3	1395/06/02 02:00:00	98.88	978	98.88	9.89078	982.986	1177.6	119.06	1183.6	1
4	1395/06/02 03:00:00	98.58	582	98.58	5.90383	590.29	719.152	121.811	729.396	1
5	1395/06/02 04:00:00	98.79	721	98.79	7.29831	727.737	881.889	120.835	890.129	1
6	1395/06/02 05:00:00	97.57	1229	97.57	12.5961	1232.87	1477.06	117.264	1481.71	1
7	1395/06/02 06:00:00	100.13	4121	100.13	41.1565	4122.22	4162.92	101.148	4164.15	1
8	1395/06/02 07:00:00	93.97	5309	93.97	56.4968	5309.83	5321.74	94.1955	5322.58	1
9	1395/06/02 08:00:00	93.72	5203	93.72	55.5164	5203.84	5252.47	94.6112	5253.33	1
21	1395/06/02 20:00:00	80.11	6088	80.11	75.9955	6088.53	6583.23	86.6266	6583.8	1
22	1395/06/02 21:00:00	82.39	6265	82.39	76.0408	6265.54	6585.93	86.6104	6586.5	1
23	1395/06/02 22:00:00	85.44	5692	85.44	66.6199	5692.64	6002.99	90.1081	6003.66	1
24	1395/06/02 23:00:00	91.31	4396	91.31	48.1437	4396.95	4711.26	97.8584	4712.28	1
1	1395/06/03 00:00:00	93.61	3429	93.61	36.6307	3430.28	3787.62	103.4	3789.04	1
2	1395/06/03 01:00:00	96.64	2129	96.64	22.0302	2131.19	2454.19	111.401	2456.71	1
3	1395/06/03 02:00:00	98.43	1080	98.43	10.9723	1084.48	1298.41	118.336	1303.79	1
4	1395/06/03 03:00:00	98.86	644	98.86	6.51426	651.544	790.712	121.382	799.975	1
5	1395/06/03 04:00:00	99.09	805	99.09	8.12393	811.076	977.015	120.264	984.389	1
6	1395/06/03 05:00:00	98.22	1558	98.22	15.8623	1561.09	1826.79	115.165	1830.42	1
7	1395/06/03 06:00:00	98.21	4402	98.21	44.8223	4403.1	4455.13	99.3952	4456.23	1
9	1395/06/03 08:00:00	91.9	5391	91.9	58.6616	5391.78	5472.57	93.2906	5473.37	1
20	1395/06/03 19:00:00	87.45	6432	87.45	73.5506	6432.59	6436.29	87.5083	6436.88	1
21	1395/06/03 20:00:00	78.29	5761	78.29	73.5854	5761.53	6438.4	87.4956	6438.99	1
22	1395/06/03 21:00:00	80.46	6259	80.46	77.7902	6259.52	6689.23	85.9906	6689.78	1
23	1395/06/03 22:00:00	82.66	5988	82.66	72.4413	5988.57	6368.62	87.9143	6369.23	1
24	1395/06/03 23:00:00	85.18	5264	85.18	61.7985	5264.69	5686.06	92.0096	5686.81	1
1	1395/06/04 00:00:00	90.61	4323	90.61	47.71	4323.95	4678.27	98.0564	4679.29	1
2	1395/06/04 01:00:00	94.65	2655	94.65	28.0507	2656.69	3028.26	107.956	3030.18	1
3	1395/06/04 02:00:00	97	1413	97	14.567	1416.33	1689.6	115.988	1693.58	1
4	1395/06/04 03:00:00	97.19	882	97.19	9.07501	887.339	1085.49	119.613	1092.06	1
5	1395/06/04 04:00:00	97.71	1311	97.71	13.4173	1314.64	1566.18	116.729	1570.53	1
6	1395/06/04 05:00:00	97.08	2072	97.08	21.3432	2074.27	2386.34	111.808	2388.96	1
7	1395/06/04 06:00:00	98.18	4288	98.18	43.6749	4289.12	4364.76	99.9375	4365.9	1
9	1395/06/04 08:00:00	93.94	5017	93.94	53.4064	5017.88	5101.29	95.5183	5102.18	1
20	1395/06/04 19:00:00	88.74	5846	88.74	65.8778	5846.67	5955.07	90.3956	5955.75	1
21	1395/06/04 20:00:00	82.32	5417	82.32	65.8042	5417.63	5950.29	90.4242	5950.98	1
22	1395/06/04 21:00:00	83.45	5585	83.45	66.9263	5585.62	6022.69	89.9899	6023.36	1
23	1395/06/04 22:00:00	84.7	5564	84.7	65.6907	5564.64	5942.93	90.4684	5943.62	1
24	1395/06/04 23:00:00	80.89	5635	80.89	69.6625	5635.58	6196.34	88.948	6196.98	1
1	1395/06/05 00:00:00	83.65	5524	83.65	66.0371	5524.63	5965.38	90.3337	5966.06	1
2	1395/06/05 01:00:00	90.12	4106	90.12	45.5615	4106.99	4512.82	99.0491	4513.91	1
3	1395/06/05 02:00:00	95.52	2091	95.52	21.8907	2093.18	2440.45	111.483	2442.99	1
4	1395/06/05 03:00:00	97.8	1150	97.8	11.7587	1154.15	1385.34	117.814	1390.34	1
5	1395/06/05 04:00:00	97.91	1109	97.91	11.3267	1113.31	1337.69	118.1	1342.89	1
6	1395/06/05 05:00:00	96.93	1534	96.93	15.8259	1537.06	1822.95	115.188	1826.59	1
7	1395/06/05 06:00:00	102.55	2852	102.55	27.8108	2853.84	3006.06	108.09	3008	1
8	1395/06/05 07:00:00	102.73	3512	102.73	34.1867	3513.5	3577.93	104.658	3579.46	1
9	1395/06/05 08:00:00	97.55	3920	97.55	40.1845	3921.21	4083.7	101.624	4084.97	1
20	1395/06/05 19:00:00	90.58	5637	90.58	62.2323	5637.73	5715.12	91.8353	5715.86	1
21	1395/06/05 20:00:00	83.2	5079	83.2	61.0457	5079.68	5635.36	92.3138	5636.12	1
22	1395/06/05 21:00:00	87.65	4815	87.65	54.9344	4815.8	5211.06	94.8597	5211.92	1
23	1395/06/05 22:00:00	87.47	4922	87.47	56.2707	4922.78	5305.83	94.291	5306.66	1
24	1395/06/05 23:00:00	82.2	5668	82.2	68.9538	5668.6	6151.75	89.2155	6152.39	1
1	1395/06/06 00:00:00	85.04	5319	85.04	62.547	5319.68	5736.14	91.7092	5736.87	1
2	1395/06/06 01:00:00	92.56	3276	92.56	35.3933	3277.31	3682.08	104.033	3683.55	1
3	1395/06/06 02:00:00	97.33	1359	97.33	13.9628	1362.48	1624.94	116.376	1629.1	1
4	1395/06/06 03:00:00	98.02	784	98.02	7.99837	790.104	962.606	120.35	970.101	1
5	1395/06/06 04:00:00	97.55	831	97.55	8.51871	836.706	1022.18	119.993	1029.2	1
6	1395/06/06 05:00:00	98.13	1401	98.13	14.277	1404.43	1658.62	116.174	1662.68	1
7	1395/06/06 06:00:00	99.29	3574	99.29	35.9956	3575.38	3733.62	103.724	3735.06	1
8	1395/06/06 07:00:00	95.77	4914	95.77	51.3104	4914.93	4948.21	96.4367	4949.15	1
9	1395/06/06 08:00:00	94.2	4867	94.2	51.6667	4867.91	4974.44	96.2794	4975.37	1
14	1395/06/06 13:00:00	73.15	3184	73.15	43.527	3184.84	4353.04	100.008	4354.19	1
21	1395/06/06 20:00:00	82.11	5833	82.11	71.0389	5833.58	6282.18	88.4329	6282.8	1
22	1395/06/06 21:00:00	82.67	6166	82.67	74.5857	6166.55	6498.86	87.1328	6499.45	1
23	1395/06/06 22:00:00	88.91	4695	88.91	52.8062	4695.84	5057.75	95.7795	5058.66	1
24	1395/06/06 23:00:00	92	3883	92	42.2065	3884.09	4247.66	100.64	4248.86	1
1	1395/06/07 00:00:00	94.23	2929	94.23	31.0835	2930.52	3304.2	106.301	3305.91	1
2	1395/06/07 01:00:00	97.3	1717	97.3	17.6465	1719.75	2012.59	114.05	2015.82	1
3	1395/06/07 02:00:00	97.68	877	97.68	8.9783	882.423	1074.51	119.679	1081.16	1
4	1395/06/07 03:00:00	97.57	621	97.57	6.36466	628.618	773.222	121.487	782.707	1
5	1395/06/07 04:00:00	99.61	700	99.61	7.02741	707.052	850.479	121.023	859.046	1
6	1395/06/07 05:00:00	97.54	1276	97.54	13.0818	1279.72	1529.88	116.947	1534.34	1
7	1395/06/07 06:00:00	100.46	3525	100.46	35.0886	3526.43	3655.9	104.191	3657.39	1
9	1395/06/07 08:00:00	90.63	5179	90.63	57.1444	5179.79	5367.17	93.923	5368	1
21	1395/06/07 20:00:00	79.26	6176	79.26	77.9208	6176.51	6696.88	85.9447	6697.43	1
22	1395/06/07 21:00:00	81.98	6083	81.98	74.201	6083.55	6475.67	87.272	6476.26	1
23	1395/06/07 22:00:00	88.18	5061	88.18	57.394	5061.77	5384.61	93.8184	5385.42	1
24	1395/06/07 23:00:00	91.44	4069	91.44	44.4991	4070.03	4429.77	99.5474	4430.89	1
1	1395/06/08 00:00:00	94.94	3075	94.94	32.3889	3076.47	3420.38	105.604	3422.01	1
2	1395/06/08 01:00:00	96.62	1856	96.62	19.2093	1858.51	2172.41	113.092	2175.35	1
3	1395/06/08 02:00:00	97.88	937	97.88	9.57295	942.098	1141.81	119.275	1148.03	1
4	1395/06/08 03:00:00	98.44	586	98.44	5.95286	594.211	724.919	121.776	735.076	1
5	1395/06/08 04:00:00	98.73	731	98.73	7.40403	737.637	894.12	120.761	902.239	1
6	1395/06/08 05:00:00	97.44	1298	97.44	13.321	1301.65	1555.78	116.791	1560.16	1
7	1395/06/08 06:00:00	99.1	3546	99.1	35.782	3547.38	3715.38	103.834	3716.83	1
9	1395/06/08 08:00:00	90.67	5321	90.67	58.6853	5321.77	5474.21	93.2807	5475.01	1
22	1395/06/08 21:00:00	83.51	6725	83.51	80.5293	6725.52	6848.03	85.0378	6848.56	1
23	1395/06/08 22:00:00	86.9	5256	86.9	60.4833	5256.72	5597.27	92.5424	5598.03	1
24	1395/06/08 23:00:00	91.41	4052	91.41	44.3278	4053.03	4416.3	99.6282	4417.42	1
1	1395/06/09 00:00:00	93.55	3363	93.55	35.9487	3364.3	3729.62	103.748	3731.06	1
2	1395/06/09 01:00:00	95.84	1961	95.84	20.4612	1963.34	2298.51	112.335	2301.25	1
3	1395/06/09 02:00:00	96.65	1048	96.65	10.8432	1052.45	1284.07	118.422	1289.52	1
4	1395/06/09 03:00:00	97.04	629	97.04	6.48186	636.441	786.927	121.404	796.237	1
5	1395/06/09 04:00:00	97.83	755	97.83	7.71747	761.312	930.296	120.544	938.074	1
6	1395/06/09 05:00:00	97.03	1410	97.03	14.5316	1413.33	1685.82	116.011	1689.81	1
7	1395/06/09 06:00:00	99.02	3628	99.02	36.6391	3629.35	3788.33	103.396	3789.74	1
9	1395/06/09 08:00:00	89.54	5401	89.54	60.3194	5401.74	5586.13	92.6092	5586.9	1
21	1395/06/09 20:00:00	79.96	6206	79.96	77.6138	6206.52	6678.88	86.0527	6679.43	1
22	1395/06/09 21:00:00	82.73	6091	82.73	73.625	6091.56	6440.81	87.4812	6441.4	1
23	1395/06/09 22:00:00	86.83	5349	86.83	61.6031	5349.7	5672.93	92.0884	5673.68	1
24	1395/06/09 23:00:00	90.71	4489	90.71	49.4874	4489.92	4812.65	97.2501	4813.63	1
1	1395/06/10 00:00:00	94	3568	94	37.9574	3569.24	3899.36	102.73	3900.71	1
2	1395/06/10 01:00:00	96.31	2112	96.31	21.9292	2114.19	2444.24	111.461	2446.78	1
3	1395/06/10 02:00:00	98.2	1086	98.2	11.0591	1090.43	1308.04	118.278	1313.38	1
4	1395/06/10 03:00:00	98.2	711	98.2	7.24033	717.749	875.174	120.875	883.482	1
5	1395/06/10 04:00:00	97.67	904	97.67	9.25566	909.261	1105.96	119.49	1112.4	1
6	1395/06/10 05:00:00	96.92	1550	96.92	15.9926	1553.03	1840.48	115.083	1844.07	1
7	1395/06/10 06:00:00	96.25	3966	96.25	41.2052	3967.17	4166.87	101.125	4168.09	1
8	1395/06/10 07:00:00	90.54	5648	90.54	62.3813	5648.73	5725.08	91.7755	5725.81	1
9	1395/06/10 08:00:00	88.95	5281	88.95	59.3704	5281.75	5521.33	92.998	5522.12	1
21	1395/06/10 20:00:00	77.35	6206	77.35	80.2327	6206.48	6831.01	85.1399	6831.54	1
22	1395/06/10 21:00:00	82.19	6278	82.19	76.384	6278.54	6606.31	86.4881	6606.88	1
23	1395/06/10 22:00:00	84.7	5728	84.7	67.6269	5728.63	6067.54	89.7208	6068.2	1
24	1395/06/10 23:00:00	86.4	5129	86.4	59.3634	5129.73	5520.85	93.0009	5521.63	1
1	1395/06/11 00:00:00	90.95	4339	90.95	47.7075	4339.95	4678.08	98.0575	4679.11	1
2	1395/06/11 01:00:00	94.42	2625	94.42	27.8013	2626.7	3005.18	108.095	3007.12	1
3	1395/06/11 02:00:00	96.86	1424	96.86	14.7016	1427.29	1703.95	115.902	1707.89	1
4	1395/06/11 03:00:00	97.27	952	97.27	9.78719	956.956	1165.95	119.13	1172.02	1
5	1395/06/11 04:00:00	98.22	1322	98.22	13.4596	1325.64	1570.75	116.701	1575.08	1
6	1395/06/11 05:00:00	96.41	1984	96.41	20.5788	1986.34	2310.26	112.264	2312.99	1
7	1395/06/11 06:00:00	97.3	3859	97.3	39.6608	3860.23	4040.71	101.882	4042	1
8	1395/06/11 07:00:00	95.1	5162	95.1	54.2797	5162.88	5164.21	95.1407	5165.09	1
9	1395/06/11 08:00:00	92.9	5281	92.9	56.8461	5281.82	5346.28	94.0483	5347.11	1
10	1395/06/11 09:00:00	90.23	5409	90.23	59.9468	5409.75	5560.75	92.7615	5561.53	1
20	1395/06/11 19:00:00	102.71	3778	102.71	36.7832	3779.4	3800.54	103.323	3801.94	1
21	1395/06/11 20:00:00	90.13	3823	90.13	42.4165	3824.06	4264.51	100.539	4265.7	1
22	1395/06/11 21:00:00	83.88	5378	83.88	64.1154	5378.65	5840.01	91.0859	5840.72	1
23	1395/06/11 22:00:00	84.86	5367	84.86	63.2453	5367.67	5782.56	91.4306	5783.28	1
24	1395/06/11 23:00:00	88.42	4488	88.42	50.7577	4488.87	4907.35	96.6819	4908.31	1
1	1395/06/12 00:00:00	76.46	5799	76.46	75.8436	5799.5	6574.19	86.6809	6574.76	1
2	1395/06/12 01:00:00	91.77	3798	91.77	41.3861	3799.11	4181.52	101.037	4182.74	1
3	1395/06/12 02:00:00	94.93	2076	94.93	21.8687	2078.17	2438.28	111.496	2440.83	1
4	1395/06/12 03:00:00	98.12	1123	98.12	11.4452	1127.28	1350.77	118.021	1355.92	1
5	1395/06/12 04:00:00	99	1024	99	10.3434	1028.77	1228.34	118.756	1234.07	1
6	1395/06/12 05:00:00	97.38	1393	97.38	14.3048	1396.4	1661.59	116.156	1665.65	1
7	1395/06/12 06:00:00	99.45	2663	99.45	26.7773	2664.86	2909.81	108.667	2911.84	1
8	1395/06/12 07:00:00	97.99	3708	97.99	37.8406	3709.29	3889.58	102.789	3890.94	1
9	1395/06/12 08:00:00	89.55	3991	89.55	44.5673	3992	4435.12	99.5153	4436.24	1
10	1395/06/12 09:00:00	96.83	4478	96.83	46.246	4479.05	4565.9	98.7306	4566.96	1
21	1395/06/12 20:00:00	84.74	5128	84.74	60.5145	5128.7	5599.39	92.5297	5600.15	1
22	1395/06/12 21:15:00	88.66	4563	88.66	51.4663	4563.86	4959.69	96.3678	4960.63	1
23	1395/06/12 22:00:00	87.98	4667	87.98	53.0461	4667.83	5075.18	95.6749	5076.09	1
24	1395/06/12 23:00:00	84.73	5263	84.73	62.115	5263.68	5707.27	91.8824	5708.01	1
1	1395/06/13 00:00:00	86.27	4971	86.27	57.6214	4971.75	5400.46	93.7232	5401.28	1
2	1395/06/13 01:00:00	93.41	2842	93.41	30.425	2843.53	3245.01	106.656	3246.76	1
3	1395/06/13 02:00:00	96.72	1358	96.72	14.0405	1361.44	1633.28	116.326	1637.42	1
4	1395/06/13 03:00:00	96.5	804	96.5	8.33161	809.77	1000.8	120.121	1007.99	1
5	1395/06/13 04:00:00	97.93	835	97.93	8.5265	840.723	1023.07	119.988	1030.09	1
6	1395/06/13 05:00:00	97.47	1310	97.47	13.44	1313.62	1568.64	116.714	1572.98	1
7	1395/06/13 06:00:00	97.11	3968	97.11	40.8609	3969.19	4138.9	101.293	4140.14	1
8	1395/06/13 07:00:00	90.49	5748	90.49	63.5208	5748.71	5800.8	91.3212	5801.52	1
9	1395/06/13 08:00:00	87.96	5224	87.96	59.3906	5224.74	5522.72	92.9897	5523.5	1
21	1395/06/13 20:00:00	79.14	7784	79.14	98.3573	7784.4	7801.44	79.3173	7801.85	1
22	1395/06/13 21:00:00	82.96	6094	82.96	73.4571	6094.56	6430.61	87.5424	6431.2	1
23	1395/06/13 22:00:00	90.41	4797	90.41	53.0583	4797.85	5076.07	95.6696	5076.97	1
24	1395/06/13 23:00:00	91.7	4118	91.7	44.9073	4119.02	4461.78	99.3553	4462.89	1
1	1395/06/14 00:00:00	94.7	3161	94.7	33.3791	3162.42	3507.51	105.081	3509.08	1
2	1395/06/14 01:00:00	95.9	1989	95.9	20.7404	1991.31	2326.4	112.168	2329.1	1
3	1395/06/14 02:00:00	98.36	1025	98.36	10.4209	1029.71	1237	118.704	1242.69	1
4	1395/06/14 03:00:00	98.51	582	98.51	5.90803	590.278	719.646	121.808	729.882	1
5	1395/06/14 04:00:00	97.83	725	97.83	7.41081	731.571	894.905	120.757	903.015	1
6	1395/06/14 05:00:00	98.38	1256	98.38	12.7668	1259.85	1495.66	117.152	1500.24	1
7	1395/06/14 06:00:00	95.99	4076	95.99	42.4628	4077.13	4268.22	100.517	4269.4	1
8	1395/06/14 07:00:00	89.89	5855	89.89	65.1352	5855.69	5906.8	90.6852	5907.49	1
9	1395/06/14 08:00:00	88.01	5413	88.01	61.5044	5413.72	5666.29	92.1283	5667.04	1
20	1395/06/14 19:00:00	87.8	6177	87.8	70.3531	6177.62	6239.53	88.6888	6240.16	1
21	1395/06/14 20:00:00	75.85	6541	75.85	86.236	6541.44	7167.84	83.1189	7168.33	1
22	1395/06/14 21:00:00	82.93	6185	82.93	74.581	6185.56	6498.58	87.1345	6499.16	1
23	1395/06/14 22:00:00	87.29	5318	87.29	60.9234	5318.72	5627.09	92.3635	5627.85	1
24	1395/06/14 23:00:00	90.94	4314	90.94	47.4379	4314.96	4657.5	98.181	4658.53	1
1	1395/06/15 00:00:00	93.55	3264	93.55	34.8904	3265.34	3638.83	104.293	3640.32	1
2	1395/06/15 01:00:00	98	1918	98	19.5714	1920.5	2209.06	112.872	2211.94	1
3	1395/06/15 02:00:00	98.22	1007	98.22	10.2525	1011.78	1218.17	118.817	1223.95	1
4	1395/06/15 03:00:00	96.92	651	96.92	6.71688	658.175	814.354	121.24	823.329	1
5	1395/06/15 04:00:00	96.9	746	96.9	7.69866	752.267	928.129	120.557	935.926	1
6	1395/06/15 05:00:00	97.55	1304	97.55	13.3675	1307.64	1560.81	116.761	1565.17	1
7	1395/06/15 06:00:00	96.74	4084	96.74	42.2162	4085.15	4248.45	100.635	4249.64	1
8	1395/06/15 07:00:00	89.98	5640	89.98	62.6806	5640.72	5745.04	91.6558	5745.77	1
9	1395/06/15 08:00:00	85.5	5184	85.5	60.6316	5184.71	5607.33	92.482	5608.09	1
20	1395/06/15 19:00:00	89.24	5870	89.24	65.7777	5870.68	5948.57	90.4346	5949.26	1
21	1395/06/15 20:00:00	82.98	5711	82.98	68.8238	5711.6	6143.54	89.2648	6144.19	1
22	1395/06/15 21:00:00	75.74	6789	75.74	89.6356	6789.42	7351.59	82.0164	7352.05	1
23	1395/06/15 22:00:00	84.42	5815	84.42	68.8818	5815.61	6147.2	89.2428	6147.85	1
24	1395/06/15 23:00:00	89.19	4564	89.19	51.1717	4564.87	4937.97	96.4982	4938.91	1
1	1395/06/16 00:00:00	92.66	3437	92.66	37.0926	3438.25	3826.69	103.166	3828.08	1
2	1395/06/16 01:00:00	94.7	2097	94.7	22.1436	2099.14	2465.34	111.334	2467.85	1
3	1395/06/16 02:00:00	97.45	1057	97.45	10.8466	1061.48	1284.45	118.419	1289.89	1
4	1395/06/16 03:00:00	99.23	647	99.23	6.52021	654.565	791.407	121.378	800.66	1
5	1395/06/16 04:00:00	97.95	780	97.95	7.96325	786.126	958.572	120.375	966.101	1
6	1395/06/16 05:00:00	97.78	1322	97.78	13.5201	1325.61	1577.29	116.662	1581.6	1
7	1395/06/16 06:00:00	98.15	4189	98.15	42.6796	4190.15	4285.57	100.413	4286.74	1
9	1395/06/16 08:00:00	87.33	5141	87.33	58.8687	5141.74	5486.85	93.2049	5487.64	1
20	1395/06/16 19:00:00	89.04	6018	89.04	67.5876	6018.66	6065.03	89.7358	6065.69	1
21	1395/06/16 20:00:00	80.17	6175	80.17	77.0238	6175.52	6644.16	86.2611	6644.72	1
22	1395/06/16 21:00:00	82.74	6148	82.74	74.3051	6148.56	6481.95	87.2343	6482.54	1
23	1395/06/16 22:00:00	87.51	5170	87.51	59.079	5170.74	5501.32	93.1181	5502.11	1
24	1395/06/16 23:00:00	89.96	4335	89.96	48.1881	4335.93	4714.63	97.8382	4715.65	1
1	1395/06/17 00:00:00	92.31	3550	92.31	38.4574	3551.2	3941.09	102.479	3942.42	1
2	1395/06/17 01:00:00	95.4	2232	95.4	23.3962	2234.04	2587.63	110.6	2589.99	1
3	1395/06/17 02:00:00	97.68	1146	97.68	11.7322	1150.16	1382.42	117.831	1387.43	1
4	1395/06/17 03:00:00	97.94	752	97.94	7.67817	758.351	925.768	120.571	933.586	1
5	1395/06/17 04:00:00	99.65	944	99.65	9.47316	949.245	1130.55	119.343	1136.83	1
6	1395/06/17 05:00:00	97.05	1673	97.05	17.2385	1675.81	1970.42	114.303	1973.74	1
7	1395/06/17 06:00:00	92.33	4600	92.33	49.8213	4600.93	4837.65	97.1001	4838.63	1
8	1395/06/17 07:00:00	87.75	5643	87.75	64.3077	5643.68	5852.65	91.0101	5853.36	1
9	1395/06/17 08:00:00	84.75	5336	84.75	62.9617	5336.67	5763.74	91.5436	5764.46	1
20	1395/06/17 19:00:00	89.66	5815	89.66	64.8561	5815.69	5888.58	90.7945	5889.28	1
21	1395/06/17 20:00:00	79.97	5954	79.97	74.4529	5954.54	6490.87	87.1808	6491.45	1
22	1395/06/17 21:00:00	79.94	6088	79.94	76.1571	6088.52	6592.84	86.5689	6593.41	1
23	1395/06/17 22:00:00	84.15	5508	84.15	65.4545	5508.64	5927.59	90.5604	5928.28	1
24	1395/06/17 23:00:00	85.19	5032	85.19	59.068	5032.72	5500.56	93.1226	5501.35	1
1	1395/06/18 00:00:00	89.88	3996	89.88	44.4593	3997.01	4426.64	99.5662	4427.76	1
2	1395/06/18 01:00:00	93.6	2718	93.6	29.0385	2719.61	3119.07	107.412	3120.92	1
3	1395/06/18 02:00:00	97.15	1478	97.15	15.2136	1481.19	1758.33	115.576	1762.12	1
4	1395/06/18 03:00:00	97.51	1052	97.51	10.7886	1056.51	1278	118.458	1283.48	1
5	1395/06/18 04:00:00	98.83	1547	98.83	15.6531	1550.15	1804.77	115.297	1808.45	1
6	1395/06/18 05:00:00	96.04	2362	96.04	24.5939	2363.95	2703.06	109.908	2705.29	1
7	1395/06/18 06:00:00	93.65	4542	93.65	48.4997	4542.97	4738.25	97.6965	4739.26	1
8	1395/06/18 07:00:00	89.21	5930	89.21	66.4724	5930.67	5993.49	90.1651	5994.16	1
9	1395/06/18 08:00:00	85.84	5339	85.84	62.1971	5339.69	5712.77	91.8494	5713.51	1
20	1395/06/18 19:00:00	94.73	5109	94.73	53.9322	5109.88	5139.23	95.2906	5140.12	1
21	1395/06/18 20:00:00	84.23	5222	84.23	61.9969	5222.68	5699.36	91.9298	5700.11	1
22	1395/06/18 21:00:00	85.74	5344	85.74	62.328	5344.69	5721.51	91.7969	5722.25	1
23	1395/06/18 22:00:00	84.18	5530	84.18	65.6926	5530.64	5943.05	90.4677	5943.74	1
24	1395/06/18 23:00:00	85.47	5454	85.47	63.8119	5454.67	5820.02	91.2059	5820.73	1
1	1395/06/19 00:00:00	86.96	5027	86.96	57.8082	5027.75	5413.46	93.6452	5414.27	1
2	1395/06/19 01:00:00	91.14	3575	91.14	39.2254	3576.16	4004.8	102.097	4006.1	1
3	1395/06/19 02:00:00	96.07	1892	96.07	19.694	1894.44	2221.43	112.797	2224.29	1
4	1395/06/19 03:00:00	95.75	1257	95.75	13.1279	1260.64	1534.88	116.917	1539.32	1
5	1395/06/19 04:00:00	97.58	1340	97.58	13.7323	1343.55	1600.16	116.525	1604.4	1
6	1395/06/19 05:00:00	95.89	1748	95.89	18.2292	1750.63	2072.5	113.691	2075.61	1
7	1395/06/19 06:00:00	97.32	3245	97.32	33.3436	3246.46	3504.4	105.1	3505.98	1
8	1395/06/19 07:00:00	92.53	3713	92.53	40.1275	3714.15	4079.03	101.652	4080.3	1
9	1395/06/19 08:00:00	93.31	3849	93.31	41.2496	3850.13	4170.47	101.103	4171.69	1
10	1395/06/19 09:00:00	98.45	4585	98.45	46.5719	4586.06	4591.04	98.5797	4592.1	1
20	1395/06/19 19:00:00	93.25	5129	93.25	55.0027	5129.85	5215.93	94.8304	5216.79	1
21	1395/06/19 20:00:00	84.2	5073	84.2	60.2494	5073.7	5581.37	92.6378	5582.14	1
22	1395/06/19 21:00:00	88.44	4577	88.44	51.7526	4577.85	4980.75	96.2415	4981.68	1
23	1395/06/19 22:00:00	88.47	4798	88.47	54.2331	4798.82	5160.86	95.1608	5161.74	1
24	1395/06/19 23:00:00	86.96	5291	86.96	60.8441	5291.71	5621.73	92.3956	5622.49	1
1	1395/06/20 00:00:00	89	4760	89	53.4831	4760.83	5106.84	95.485	5107.73	1
2	1395/06/20 01:00:00	95.41	2674	95.41	28.0264	2675.7	3026.01	107.97	3027.94	1
3	1395/06/20 02:00:00	97.57	1304	97.57	13.3648	1307.65	1560.51	116.763	1564.87	1
4	1395/06/20 03:00:00	98.75	797	98.75	8.07089	803.094	970.931	120.3	978.355	1
5	1395/06/20 04:00:00	98.27	924	98.27	9.40267	929.211	1122.59	119.39	1128.92	1
6	1395/06/20 05:00:00	98.01	1361	98.01	13.8863	1364.52	1616.73	116.426	1620.91	1
7	1395/06/20 06:00:00	93.53	4094	93.53	43.7721	4095.07	4372.45	99.8913	4373.59	1
8	1395/06/20 07:00:00	88.57	5974	88.57	67.4495	5974.66	6056.21	89.7888	6056.87	1
9	1395/06/20 08:00:00	85.67	5153	85.67	60.1494	5153.71	5574.56	92.6786	5575.33	1
20	1395/06/20 19:00:00	88.48	6054	88.48	68.4222	6054.65	6118.13	89.4172	6118.78	1
21	1395/06/20 20:00:00	82.06	5773	82.06	70.351	5773.58	6239.4	88.6896	6240.03	1
22	1395/06/20 21:00:00	83.06	5771	83.06	69.4799	5771.6	6184.87	89.0168	6185.52	1
23	1395/06/20 22:00:00	90.96	4580	90.96	50.3518	4580.9	4877.21	96.8627	4878.17	1
24	1395/06/20 23:00:00	89.36	4275	89.36	47.8402	4275.93	4688.19	97.9969	4689.21	1
1	1395/06/21 00:00:00	92.04	3274	92.04	35.5715	3275.29	3697.37	103.942	3698.83	1
2	1395/06/21 01:00:00	94.53	2063	94.53	21.8238	2065.16	2433.85	111.523	2436.4	1
3	1395/06/21 02:00:00	97.51	1149	97.51	11.7834	1153.13	1388.06	117.798	1393.05	1
4	1395/06/21 03:00:00	97.75	713	97.75	7.29412	719.669	881.404	120.838	889.648	1
5	1395/06/21 04:00:00	97.74	919	97.74	9.4025	924.183	1122.57	119.391	1128.9	1
6	1395/06/21 05:00:00	97.27	1478	97.27	15.1948	1481.2	1756.34	115.588	1760.14	1
7	1395/06/21 06:00:00	95.04	4069	95.04	42.8136	4070.11	4296.27	100.348	4297.44	1
8	1395/06/21 07:00:00	88.82	5444	88.82	61.2925	5444.72	5652.02	92.2139	5652.77	1
9	1395/06/21 08:00:00	87.07	4952	87.07	56.8738	4952.77	5348.22	94.0367	5349.05	1
18	1395/06/21 17:00:00	90.29	5607	90.29	62.0999	5607.73	5706.26	91.8884	5707	1
20	1395/06/21 19:00:00	91.1	5301	91.1	58.1888	5301.78	5439.88	93.4867	5440.68	1
21	1395/06/21 20:00:00	76.11	6396	76.11	84.0363	6396.45	7046.29	83.8482	7046.79	1
22	1395/06/21 21:00:00	77.89	6516	77.89	83.6564	6516.47	7025.09	83.9755	7025.59	1
23	1395/06/21 22:00:00	81.6	5814	81.6	71.25	5814.57	6295.26	88.3545	6295.88	1
24	1395/06/21 23:00:00	83.11	5258	83.11	63.2656	5258.66	5783.9	91.4226	5784.62	1
1	1395/06/22 00:00:00	88.65	4642	88.65	52.3632	4642.85	5025.47	95.9732	5026.38	1
2	1395/06/22 01:00:00	94.41	3303	94.41	34.9857	3304.35	3647.04	104.244	3648.53	1
3	1395/06/22 02:00:00	97.67	1867	97.67	19.1154	1869.55	2162.88	113.149	2165.84	1
4	1395/06/22 03:00:00	98.46	1235	98.46	12.5432	1238.92	1471.29	117.298	1475.96	1
5	1395/06/22 04:00:00	97.94	1455	97.94	14.856	1458.29	1720.38	115.804	1724.28	1
6	1395/06/22 05:00:00	96.75	1909	96.75	19.7313	1911.45	2225.19	112.775	2228.05	1
7	1395/06/22 06:00:00	97.08	3277	97.08	33.7557	3278.44	3540.41	104.884	3541.97	1
8	1395/06/22 07:00:00	92.74	3578	92.74	38.581	3579.2	3951.38	102.418	3952.7	1
9	1395/06/22 08:00:00	95.39	3561	95.39	37.331	3562.28	3846.78	103.045	3848.16	1
20	1395/06/22 19:00:00	92.98	5018	92.98	53.9686	5018.86	5141.85	95.2749	5142.73	1
21	1395/06/22 20:00:00	85.39	4931	85.39	57.7468	4931.74	5409.19	93.6708	5410	1
22	1395/06/22 21:00:00	89.74	4354	89.74	48.5179	4354.92	4739.63	97.6882	4740.64	1
23	1395/06/22 22:00:00	88.19	4643	88.19	52.6477	4643.84	5046.21	95.8487	5047.12	1
24	1395/06/22 23:00:00	81.39	5678	81.39	69.7629	5678.58	6202.63	88.9102	6203.27	1
1	1395/06/23 00:00:00	86.42	4965	86.42	57.452	4965.75	5388.65	93.7941	5389.47	1
2	1395/06/23 01:00:00	93.56	2933	93.56	31.3489	2934.49	3327.94	106.158	3329.64	1
3	1395/06/23 02:00:00	95.91	1211	95.91	12.6264	1214.79	1480.37	117.244	1485	1
4	1395/06/23 03:00:00	98.95	700	98.95	7.07428	706.959	855.921	120.99	864.43	1
5	1395/06/23 04:00:00	98.19	888	98.19	9.04369	893.412	1081.94	119.634	1088.53	1
6	1395/06/23 05:00:00	97.59	1414	97.59	14.4892	1417.36	1681.3	116.038	1685.3	1
7	1395/06/23 06:00:00	92.69	4147	92.69	44.7405	4148.04	4448.72	99.4337	4449.83	1
8	1395/06/23 07:00:00	84.08	5794	84.08	68.9106	5794.61	6149.02	89.2319	6149.67	1
9	1395/06/23 08:00:00	85.02	5038	85.02	59.2566	5038.72	5513.53	93.0448	5514.31	1
19	1395/06/23 18:00:00	79.59	6401	79.59	80.4247	6401.49	6842.03	85.0738	6842.56	1
20	1395/06/23 19:00:00	82.7	5839	82.7	70.6046	5839.59	6255.2	88.5948	6255.83	1
21	1395/06/23 20:00:00	78.98	6426	78.98	81.3624	6426.49	6895.64	84.7522	6896.16	1
22	1395/06/23 21:00:00	83.65	5955	83.65	71.1895	5955.59	6291.51	88.3769	6292.13	1
23	1395/06/23 22:00:00	89.72	4759	89.72	53.0428	4759.85	5074.94	95.6764	5075.84	1
24	1395/06/23 23:00:00	88.96	4258	88.96	47.8642	4258.93	4690.02	97.9859	4691.04	1
1	1395/06/24 00:00:00	93.85	3272	93.85	34.8641	3273.35	3636.56	104.307	3638.06	1
2	1395/06/24 01:00:00	95.57	2200	95.57	23.0198	2202.07	2551.05	110.82	2553.45	1
3	1395/06/24 02:00:00	96.57	1123	96.57	11.6289	1127.14	1371.04	117.9	1376.1	1
4	1395/06/24 03:00:00	97.99	723	97.99	7.3783	729.61	891.145	120.779	899.293	1
5	1395/06/24 04:00:00	98.02	985	98.02	10.049	989.865	1195.36	118.954	1201.27	1
6	1395/06/24 05:00:00	97.19	1475	97.19	15.1765	1478.2	1754.39	115.6	1758.2	1
7	1395/06/24 06:00:00	94.09	4204	94.09	44.6806	4205.05	4444.02	99.4619	4445.13	1
8	1395/06/24 07:00:00	86.91	5527	86.91	63.5945	5527.68	5805.67	91.292	5806.39	1
9	1395/06/24 08:00:00	85.83	5019	85.83	58.4761	5019.73	5459.76	93.3674	5460.56	1
20	1395/06/24 19:00:00	89.5	5680	89.5	63.4637	5680.71	5797.02	91.3439	5797.74	1
21	1395/06/24 20:00:00	80.49	6144	80.49	76.3325	6144.53	6603.25	86.5065	6603.82	1
22	1395/06/24 21:00:00	82.24	6138	82.24	74.6352	6138.55	6501.84	87.1149	6502.43	1
23	1395/06/24 22:00:00	87.49	5274	87.49	60.2812	5274.73	5583.53	92.6248	5584.3	1
24	1395/06/24 23:00:00	86.39	4823	86.39	55.8282	4823.77	5274.57	94.4786	5275.42	1
1	1395/06/25 00:00:00	90.95	3990	90.95	43.8703	3991.04	4380.21	99.8447	4381.35	1
2	1395/06/25 01:00:00	94.1	2614	94.1	27.779	2615.69	3003.11	108.107	3005.05	1
3	1395/06/25 02:00:00	96	1420	96	14.7917	1423.24	1713.54	115.845	1717.45	1
4	1395/06/25 03:00:00	98.74	957	98.74	9.69212	962.08	1155.25	119.195	1161.38	1
5	1395/06/25 04:00:00	97.5	1184	97.5	12.1436	1188.01	1427.6	117.56	1432.44	1
6	1395/06/25 05:00:00	98.26	1768	98.26	17.9931	1770.73	2048.27	113.836	2051.43	1
7	1395/06/25 06:00:00	95.7	3928	95.7	41.0449	3929.17	4153.86	101.203	4155.1	1
8	1395/06/25 07:00:00	94.61	4446	94.61	46.9929	4447.01	4623.42	98.3855	4624.47	1
9	1395/06/25 08:00:00	87.91	4593	87.91	52.2466	4593.84	5016.95	96.0243	5017.86	1
20	1395/06/25 19:00:00	90.83	5238	90.83	57.6682	5238.79	5403.72	93.7037	5404.53	1
21	1395/06/25 20:00:00	84.41	5380	84.41	63.7365	5380.66	5815.05	91.2357	5815.76	1
22	1395/06/25 21:00:00	86.93	4905	86.93	56.4247	4905.77	5316.67	94.226	5317.51	1
23	1395/06/25 22:00:00	87.45	4970	87.45	56.8325	4970.77	5345.32	94.0541	5346.15	1
24	1395/06/25 23:00:00	82.97	5446	82.97	65.6382	5446.63	5939.52	90.4889	5940.21	1
1	1395/06/26 00:00:00	86.96	5080	86.96	58.4177	5080.74	5455.72	93.3917	5456.52	1
2	1395/06/26 01:00:00	92.14	3747	92.14	40.6664	3748.13	4123.07	101.388	4124.31	1
3	1395/06/26 02:00:00	95.97	1948	95.97	20.298	1950.36	2282.17	112.433	2284.93	1
4	1395/06/26 03:00:00	97.12	1070	97.12	11.0173	1074.4	1303.41	118.306	1308.77	1
5	1395/06/26 04:00:00	97.97	1090	97.97	11.1259	1094.39	1315.45	118.233	1320.75	1
6	1395/06/26 05:00:00	97.73	1263	97.73	12.9234	1266.78	1512.68	117.05	1517.2	1
7	1395/06/26 06:00:00	99.97	2389	99.97	23.8972	2391.09	2636.08	110.309	2638.39	1
8	1395/06/26 07:00:00	94.46	2902	94.46	30.722	2903.54	3271.75	106.495	3273.49	1
9	1395/06/26 08:00:00	93.8	3438	93.8	36.6525	3439.28	3789.47	103.389	3790.88	1
10	1395/06/26 09:00:00	100.43	4138	100.43	41.2028	4139.22	4166.68	101.126	4167.9	1
20	1395/06/26 19:00:00	94	4303	94	45.7766	4304.03	4529.54	98.9488	4530.62	1
21	1395/06/26 20:00:00	84.5	4731	84.5	55.9882	4731.75	5285.88	94.4107	5286.73	1
22	1395/06/26 21:00:00	89.97	4116	89.97	45.7486	4116.98	4527.36	98.9618	4528.44	1
23	1395/06/26 22:00:00	90.2	4356	90.2	48.2927	4356.93	4722.57	97.7906	4723.58	1
24	1395/06/26 23:00:00	85.36	5143	85.36	60.2507	5143.71	5581.46	92.6372	5582.23	1
1	1395/06/27 00:00:00	90.84	4270	90.84	47.0057	4270.97	4624.4	98.3796	4625.45	1
2	1395/06/27 01:00:00	95.67	2628	95.67	27.4694	2629.74	2974.38	108.28	2976.35	1
3	1395/06/27 02:00:00	98.17	1218	98.17	12.407	1221.95	1456.43	117.387	1461.15	1
4	1395/06/27 03:00:00	98.71	731	98.71	7.40553	737.635	894.294	120.76	902.41	1
5	1395/06/27 04:00:00	99.32	788	99.32	7.93395	794.235	955.206	120.395	962.764	1
6	1395/06/27 05:00:00	98	1270	98	12.9592	1273.78	1516.57	117.027	1521.08	1
7	1395/06/27 06:00:00	93.56	3862	93.56	41.2783	3863.13	4172.79	101.089	4174.02	1
8	1395/06/27 07:00:00	86.75	5917	86.75	68.2075	5917.64	6104.5	89.499	6105.16	1
9	1395/06/27 08:00:00	82.12	5145	82.12	62.6522	5145.66	5743.15	91.6671	5743.88	1
20	1395/06/27 19:00:00	88.99	5388	88.99	60.5461	5388.73	5601.53	92.5168	5602.3	1
21	1395/06/27 20:00:00	74.99	6500	74.99	86.6782	6500.43	7192.03	82.9738	7192.5	1
22	1395/06/27 21:00:00	83.94	5731	83.94	68.275	5731.61	6108.79	89.4733	6109.44	1
23	1395/06/27 22:00:00	91.23	4500	91.23	49.3259	4500.92	4800.53	97.3228	4801.52	1
24	1395/06/27 23:00:00	90.46	4069	90.46	44.9812	4070.01	4467.56	99.3206	4468.67	1
1	1395/06/28 00:00:00	93.54	3127	93.54	33.4295	3128.4	3511.92	105.054	3513.49	1
2	1395/06/28 01:00:00	95.48	1847	95.48	19.3444	1849.47	2186.1	113.009	2189.01	1
3	1395/06/28 02:00:00	97.4	1001	97.4	10.2772	1005.73	1220.94	118.8	1226.7	1
4	1395/06/28 03:00:00	95.97	635	95.97	6.61665	642.211	802.666	121.31	811.781	1
5	1395/06/28 04:00:00	97.28	729	97.28	7.49383	735.462	904.498	120.699	912.516	1
6	1395/06/28 05:00:00	98.19	1233	98.19	12.5573	1236.9	1472.83	117.289	1477.49	1
7	1395/06/28 06:00:00	94.53	3740	94.53	39.5642	3741.19	4032.75	101.929	4034.04	1
8	1395/06/28 07:00:00	89.38	4968	89.38	55.5829	4968.8	5257.19	94.5829	5258.04	1
9	1395/06/28 08:00:00	87.86	4462	87.86	50.7853	4462.86	4909.4	96.6696	4910.35	1
20	1395/06/28 19:00:00	86.28	5883	86.28	68.185	5883.63	6103.07	89.5076	6103.73	1
21	1395/06/28 20:00:00	77.3	6489	77.3	83.9457	6489.46	7041.24	83.8786	7041.74	1
22	1395/06/28 21:00:00	81	6356	81	78.4691	6356.52	6728.92	85.7525	6729.47	1
23	1395/06/29 22:00:00	81.47	5986	81.47	73.4749	5986.55	6431.69	87.5359	6432.28	1
24	1395/06/29 23:00:00	84.73	5440	84.73	64.2039	5440.66	5845.83	91.051	5846.54	1
